# Supplementary material for: Magnetospheric Control of Ionospheric TEC Perturbations via Whistler‐Mode and ULF Waves
Source: PubMed Central journal article supplement (PMC11600791; doi:10.1029/2024av001302), 2024-11-25

1                    **Magnetospheric control of ionospheric TEC**  
2                    **perturbations via whistler-mode and ULF waves**

3                    **Yangyang Shen<sup>1</sup>, Olga P. Verkhoglyadova<sup>2</sup>, Anton Artemyev<sup>1</sup>, Michael D.**  
4                    **Hartinger<sup>3,1</sup>, Vassilis Angelopoulos<sup>1</sup>, Xueling Shi<sup>4</sup>, Ying Zou<sup>5</sup>**

5                    <sup>1</sup>Department of Earth, Planetary, and Space Sciences, University of California, Los Angeles, CA, USA

6                    <sup>2</sup>Jet Propulsion Laboratory, California Institute of Technology, Pasadena, CA, USA

7                    <sup>3</sup>Space Science Institute, Center for Space Plasma Physics, Boulder, CO, USA

8                    <sup>4</sup>Department of Electrical and Computer Engineering, Virginia Tech, Blacksburg, VA, USA

9                    <sup>5</sup>Johns Hopkins University Applied Physics Laboratory, Laurel, MD, USA

10                    **Key Points:**

- 11                    • Space-ground conjugate observations point to magnetospheric whistler-mode waves  
12                    as the driver of ionospheric TEC perturbations (dTEC)
- 13                    • The amplitude spectra of dTEC and whistlers are consistent and the cross-correlation  
14                    between modeled and observed dTEC reaches 0.8
- 15                    • Whistler-mode wave amplitudes and dTEC are modulated by ULF waves, which  
16                    exhibit concurrent compressional and poloidal mode variations

**Abstract**

The weakly ionized plasma in the Earth's ionosphere is controlled by a complex interplay between solar and magnetospheric inputs from above, atmospheric processes from below, and plasma electrodynamics from within. This interaction results in ionosphere structuring and variability that pose major challenges for accurate ionosphere prediction for global navigation satellite system (GNSS) related applications and space weather research. The ionospheric structuring and variability are often probed using the total electron content (TEC) and its relative perturbations (dTEC). Among dTEC variations observed at high latitudes, a unique modulation pattern has been linked to magnetospheric ultra-low-frequency (ULF) waves, yet its underlying mechanisms remain unclear. Here using magnetically-conjugate observations from the THEMIS spacecraft and a ground-based GPS receiver at Fairbanks, Alaska, we provide direct evidence that these dTEC modulations are driven by magnetospheric electron precipitation induced by ULF-modulated whistler-mode waves. We observed peak-to-peak dTEC amplitudes reaching  $\sim 0.5$  TECU (1 TECU is equal to  $10^6$  electrons/m<sup>2</sup>) with modulations spanning scales of  $\sim 5$ –100 km. The cross-correlation between our modeled and observed dTEC reached  $\sim 0.8$  during the conjugacy period but decreased outside of it. The spectra of whistler-mode waves and dTEC also matched closely at ULF frequencies during the conjugacy period but diverged outside of it. Our findings elucidate the high-latitude dTEC generation from magnetospheric wave-induced precipitation, addressing a significant gap in current physics-based dTEC modeling. These results thus improve ionospheric dTEC prediction and enhance our understanding of magnetosphere-ionosphere coupling via ULF waves.

**Plain Language Summary**

Radio signals are refracted or diffracted as they traverse the ionosphere filled with free electrons. The ionosphere TEC, which is the total number of electrons along the ray-path from the satellite to a receiver, helps to correct refractive errors in the signal, while its relative perturbations dTEC can be used to probe diffractive fluctuations known as ionosphere scintillation. Refractive error degrades GNSS positioning service accuracy while scintillation leads to signal reception failures and disrupts navigation and communication. Thus, an accurate understanding and modeling of TEC and dTEC is vital for space weather monitoring and GNSS-related applications. This study analyzes conjugate observations of ionospheric dTEC from a ground-based GPS receiver and magnetospheric

whistler-mode waves (a distinct type of very-low-frequency electromagnetic waves) from the THEMIS spacecraft, which were well-aligned both in time and space. We find a good cross-correlation ( $\sim 0.8$ ) between observed and modeled dTEC, driven by whistler-induced magnetospheric electron precipitation. These results point to whistler-mode waves as the driver of the observed dTEC. Both dTEC and whistler-mode wave amplitudes were modulated by ULF waves. These findings enhance physics-based ionospheric TEC prediction and our understanding of magnetosphere-ionosphere coupling.

## 1 Introduction

The Earth’s ionosphere contains weakly ionized plasma in the atmosphere between approximately 80 km and 1000 km altitude. The state of ionospheric plasma is controlled by a complex interplay between solar and magnetospheric inputs from above, neutral atmospheric processes from below, and plasma electrodynamics from within. The resulting structuring and variability of ionospheric plasma have a major, adverse impact on the global navigation satellite system (GNSS) radio signals as they propagate through the ionosphere and experience varying degrees of refraction and diffraction (Morton et al., 2020). Refraction causes signal group delay and phase advance, leading to dominant errors in GNSS position, velocity, and time solutions, while diffraction causes stochastic intensity and phase fluctuations at the receiver, commonly known as ionospheric scintillation (Yeh & Liu, 1982; Rino, 2011). Scintillation leads to increased GNSS receiver measurement noise and errors and, in extreme cases, phase-tracking loss of lock or signal reception failures (Kintner et al., 2007). Thus, these ionospheric effects pose real threats to the reliability, continuity, and accuracy of GNSS operations and applications (Morton et al., 2020; Coster & Yizengaw, 2021). Understanding the causes for ionospheric structuring and variability is critical for forecasting their impacts on GNSS applications—a long-standing challenge for space weather research (Hey et al., 1946; Jakowski et al., 2011; Morton et al., 2020). The importance of this ionosphere forecasting has recently gained increased attention as the solar maximum unfolds and concerns over space weather events such as geomagnetic storms loom large (e.g., Kintner et al., 2007; Pulkkinen et al., 2017; Hapgood et al., 2022).

Ionospheric refraction is typically quantified by the total electron content (TEC), which is the total number of electrons within a unit cross section along the raypath extending from the receiver to the satellite. For dual-frequency GNSS or Global Position-

81 ing System (GPS) receivers, the TEC is estimated from differential group delays and carrier-  
82 phase advances (Mannucci et al., 1998; Ciraolo et al., 2007; McCaffrey & Jayachandran,  
83 2017). Global TEC maps, constructed from networks of GNSS receivers on the ground  
84 and in orbit, can be used not only to correct ionospheric effects in GNSS-related appli-  
85 cations but also to monitor large- and meso-scale traveling ionospheric disturbances, typ-  
86 ically exceeding 100 km in horizontal wavelength (Hunsucker, 1982; Themens et al., 2022;  
87 S.-R. Zhang et al., 2022). Travelling ionospheric disturbances may result from internal  
88 ionospheric dynamics or from atmospheric effects from below linked to natural hazards,  
89 such as tsunamis, earthquakes, explosions, and volcanic eruptions (Komjathy et al., 2016;  
90 Astafyeva, 2019). High-resolution TEC from individual receivers and its relative pertur-  
91 bations dTEC and rate of changes (ROTI) are often used for detecting small-scale iono-  
92 spheric irregularities and scintillation events (Pi et al., 1997; Cherniak et al., 2014; Mc-  
93 Caffrey & Jayachandran, 2019; Makarevich et al., 2021; Nishimura et al., 2023).

94 While empirical and climatological TEC models exist (Rideout & Coster, 2006; Jakowski  
95 et al., 2011), physics-based modeling of TEC perturbations remains challenging. One of  
96 the main challenges in physical modeling of dTEC and space weather prediction is the  
97 complex structuring and variability of ionosphere plasma. Rapid (<a few minutes) and  
98 small-scale (<~100 km) dTEC are observed at both low and high latitudes but gener-  
99 ated by distinct mechanisms and drivers (Pi et al., 1997; Basu et al., 2002; Kintner et  
100 al., 2007; Spogli et al., 2009; Moen et al., 2013; Pilipenko et al., 2014; Jin et al., 2015;  
101 Prikryl et al., 2015; Watson, Jayachandran, Singer, et al., 2016; Fæhn Follestad et al.,  
102 2020). Near equatorial latitudes, these small-scale dTEC result from plasma bubbles or  
103 density depletions formed around post-sunset, primarily driven by the Rayleigh-Taylor  
104 instability associated with lower atmosphere-ionosphere coupling processes (C.-S. Huang  
105 & Kelley, 1996; Kelley, 2009; Xiong et al., 2010; Aa et al., 2020; Jin et al., 2020). At high  
106 latitudes, dTEC are associated with plasma irregularities in the auroral, cusp, and po-  
107 lar cap regions, spanning a few meters to hundreds of kilometers in spatial scale (e.g.,  
108 Basu et al., 1990; Moen et al., 2013; Spicher et al., 2017). These irregularities are pri-  
109 marily driven by solar-magnetosphere-ionosphere coupling, which involves a complex in-  
110 terplay and synergy among solar extreme-ultraviolet radiation, plasma  $\vec{E} \times \vec{B}$  drifts, charged-  
111 particle precipitation into the atmosphere, magnetic field-aligned currents, and various  
112 ionospheric plasma instabilities (Kelley, 2009; Moen et al., 2013; Spicher et al., 2015; Fæhn  
113 Follestad et al., 2020).

114 Among dTEC variations observed near the auroral latitudes, a unique modulation  
115 pattern has been linked to magnetospheric ultra low frequency (ULF) waves (Davies &  
116 Hartmann, 1976; Okuzawa & Davies, 1981; Skone, 2009; Pilipenko et al., 2014; Watson  
117 et al., 2015; Watson, Jayachandran, Singer, et al., 2016; Zhai et al., 2021). These ULF  
118 waves feature broadband or quasi-monochromatic geomagnetic pulsations with periods  
119 from about 0.2 to 600 s (Jacobs et al., 1964) and are considered to be crucial for energy  
120 and plasma transport throughout the solar-magnetosphere-ionosphere-thermosphere sys-  
121 tem (e.g., Southwood & Kivelson, 1981; M. K. Hudson et al., 2000, 2008; Hartinger et  
122 al., 2015, 2022; Zong et al., 2017). Skone (2009) noted that average power of ground-based  
123 ULF waves and dTEC exhibited similar temporal variations in the Pc3 band ( $\sim 22$ – $100$   
124 mHz). Pilipenko et al. (2014) observed a high coherence ( $\sim 0.9$ ) between dTEC and global  
125 Pc5 pulsations in a few mHz during a geomagnetic storm. Watson, Jayachandran, Singer,  
126 et al. (2016) also reported a high coherence and common power between dTEC and ULF  
127 radial magnetic field variations in the Pc4 band (6.7–22 mHz). Fully understanding ULF-  
128 induced ionospheric dTEC not only enhances the ionosphere forecasting during space  
129 weather events but also elucidates the critical pathways of geospace energy coupling and  
130 dissipation via ULF waves.

131 To date, despite numerous proposals for direct dTEC modulation mechanisms by  
132 ULF waves (Pilipenko et al., 2014), no mechanism has yet been conclusively established.  
133 Recently, Wang et al. (2020) have reported a storm-time event where duskside ionospheric  
134 density was modulated by ULF waves in the Pc5 range. Pc5-modulated density varia-  
135 tions observed from radar data were used to infer modulated precipitating electrons over  
136 an energy range of  $\sim 1$ – $500$  keV and an altitude range of  $\sim 80$ – $200$  km. Higher-energy pre-  
137 cipitating electrons deposit their energy and induce impact ionization at lower altitudes,  
138 whereas lower-energy electrons do so at higher altitudes. The authors postulated that  
139 the precipitation and density perturbations are likely due to electron pitch-angle scat-  
140 tered into the loss cone by ULF-modulated very low frequency whistler-mode waves.

141 This postulation of whistler-driven dTEC is supported by extensive observations  
142 and models that demonstrate that ULF waves often coexist with and modulate whistler-  
143 mode waves (Coroniti & Kennel, 1970; W. Li, Thorne, et al., 2011; W. Li, Bortnik, Thorne,  
144 Nishimura, et al., 2011; Watt et al., 2011; Jaynes et al., 2015; Xia et al., 2016, 2020; X.-  
145 J. Zhang et al., 2019; X. J. Zhang et al., 2020; X. Shi et al., 2022; L. Li et al., 2022, 2023).  
146 The modulation of the whistler-mode wave growth is potentially attributed to compression-

147 induced ambient thermal or resonant hot electron density variations (W. Li, Bortnik, Thorne,  
148 Nishimura, et al., 2011; Xia et al., 2016, 2020; X.-J. Zhang et al., 2019; X. J. Zhang et  
149 al., 2020), resonant electron anisotropy variations (W. Li, Thorne, et al., 2011; Watt et  
150 al., 2011), and nonlinear resonant effects from periodic magnetic field configuration vari-  
151 ations (L. Li et al., 2022, 2023). The periodic excitation of whistler-mode waves at ULF  
152 wave frequencies leads to periodic electron precipitation, which drives pulsating auro-  
153 ras (e.g., Miyoshi et al., 2010; Nishimura et al., 2010; Jaynes et al., 2015) and potentially  
154 explains many previously reported dTEC modulations at ULF frequencies (Pilipenko et  
155 al., 2014; Watson, Jayachandran, Singer, et al., 2016; Zhai et al., 2021).

156 However, it is challenging to establish a direct link between magnetospheric drivers  
157 and ionospheric dTEC during ULF modulation events due to several complicating fac-  
158 tors: (1) the path-integrated nature of dTEC, which strongly depend on the satellite-  
159 to-receiver raypath elevation (e.g., Jakowski et al., 1996; Komjathy, 1997), (2) inherent  
160 phase shifts due to coexisting propagation and modulation effects (Watson et al., 2015),  
161 particularly when conjugate observations are misaligned or not synchronized, and (3) the  
162 dynamic and turbulent nature of the auroral ionosphere (Kelley, 2009). Direct evidence  
163 linking dTEC to magnetospheric drivers is yet to be identified.

164 In this study, conjugate observations from the THEMIS spacecraft and the GPS  
165 receiver at Fairbanks, Alaska (FAIR) allow us to identify the driver of GPS dTEC as mag-  
166 netospheric electron precipitation induced by ULF-modulated whistler-mode waves. Fig-  
167 ure 1 illustrates the physical picture emerging from these magnetically-conjugate mag-  
168 netospheric and ionospheric observations of ULF waves, modulated whistler-mode waves,  
169 electron precipitation, and dTEC.

170 In what follows, Section 2 describes datasets and models employed to estimate whistler-  
171 driven precipitation and resulting dTEC. Section 3 presents a detailed analysis and cross-  
172 correlation between observed and modeled dTEC. Section 4 discusses the geophysical  
173 implications and applications of our results, which are followed by the main conclusions.

## 174 **2 Data and Methodology**

175 We derive 1-s TEC measurements from phase and pseudorange data collected by  
176 the GPS receiver at FAIR during 15:06–16:36 UT on July 3, 2013, processed at the Jet  
177 Propulsion Laboratory using the GipsyX and Global Ionospheric Mapping software (Komjathy

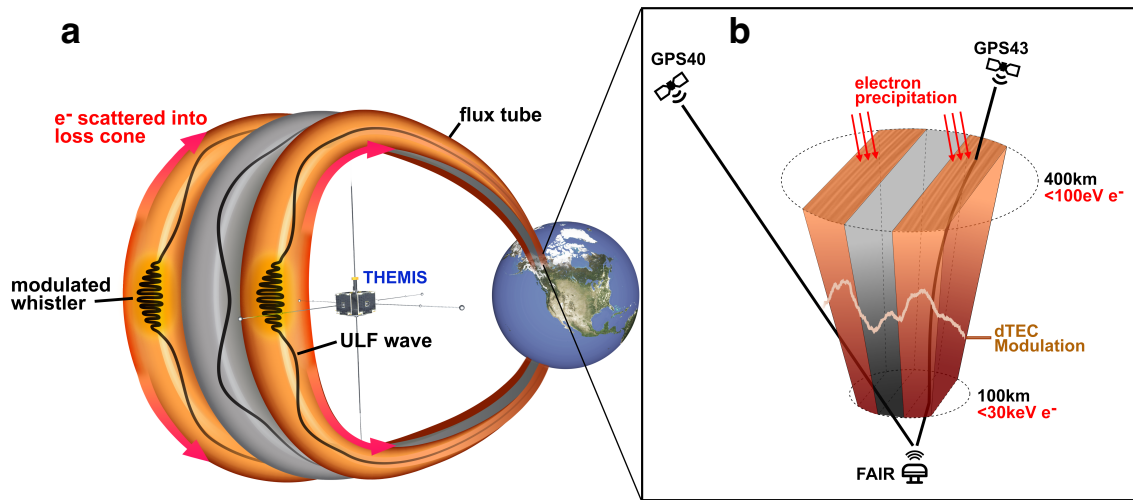

**Figure 1.** Schematic diagram showing coordinated observations from THEMIS and FAIR of (a) modulation of whistler-mode waves near the magnetic equator by ULF waves, electron pitch-angle scattering into the loss cone, and precipitation into the ionosphere (red arrows) induced by modulated whistler-mode waves; and (b) the modulated electron precipitation with energies of  $\sim 0.1\text{--}30\text{ keV}$  deposits their energies at altitudes between  $\sim 100\text{--}400\text{ km}$  and induces modulated impact ionization and dTEC having amplitudes as large as  $\sim 0.5\text{ TECU}$  and spanning scales of  $\sim 5\text{--}100\text{ km}$ . This dTEC modulation was captured by the signal from GPS43, which has a high elevation, but was overlooked by the signal from GPS40, which has a relatively lower elevation.

178 et al., 2005; Bertiger et al., 2020). Phase-based TEC measurements are leveled using pseu-  
179 dorange delays for each phase-connected data collection. We focus on links between FAIR  
180 and GPS satellites with pseudo random noise numbers 40, 43, and 60, referred to as GPS40,  
181 GPS43, and GPS60, whose ionospheric pierce points at 300 km altitude are within 200  
182 km proximity to FAIR, or pierce points at 150 km within 100 km proximity to FAIR,  
183 to ensure relatively high elevation angles and thus better observation geometry to resolve  
184 dTEC.

185 The pierce point of 300 km altitude is selected based on the measured F2-region  
186 peak density height hmF2 from the ground-based ionosonde located at the Eielson sta-  
187 tion (64.66°N, 212.03°E) in Supporting Information. While the background density peaks  
188 at  $\sim 300$  km in the F2 region, the modulation of dTEC may be located at lower altitudes.  
189 Thus, we also present results using an ionosphere pierce point at 150 km altitude. The  
190 obtained TEC is expressed in TEC units (TECU), i.e.,  $10^{16}$  electrons/m<sup>2</sup>. The slant TEC  
191 is converted to VTEC using the standard mapping function (e.g., Mannucci et al., 1998).  
192 Measurements with elevation angles less than 30° are excluded to reduce multipath ef-  
193 fects (Jakowski et al., 1996). The VTEC data are then detrended to get dTEC using a  
194 fourth-order Butterworth lowpass filter. The low pass filter has a cutoff period of 25 min,  
195 to focus on ULF-related perturbations and reduce contributions from medium- and large-  
196 scale travelling ionosphere disturbances (Hunsucker, 1982).

197 We use the following datasets from THEMIS E (Angelopoulos, 2008): electron en-  
198 ergy and pitch-angle distributions measured by the Electrostatic Analyzers instrument  
199 in the energy range of several eV up to 30 keV (McFadden et al., 2008), DC vector mag-  
200 netic field at spin resolution ( $\sim 3$  s) measured by the Fluxgate Magnetometers (Auster  
201 et al., 2008), electric and magnetic field wave spectra within 1 Hz–4 kHz, measured ev-  
202 ery  $\sim 8$  s by the Digital Fields Board, the Electric Field Instrument, and the search coil  
203 magnetometer (Le Contel et al., 2008; Bonnell et al., 2008; Cully, Ergun, et al., 2008).  
204 Background electron densities are inferred from spacecraft potentials (Bonnell et al., 2008;  
205 Nishimura et al., 2013). We also use ground-based magnetometer measurements every  
206 1 s from the College (CMO) site operated by the United States Geological Survey Ge-  
207 omagnetism Program and from the Fort Yukon (FYKN) site operated by the Geophys-  
208 ical Institute at the University of Alaska.



209 THEMIS observations of electron distributions and wave spectra allow us to cal-  
 210 culate the precipitating flux of electrons scattered into the loss cone by whistler-mode  
 211 waves using quasilinear diffusion theory (Kennel & Engelmann, 1966; Lyons, 1974). For  
 212 whistler-mode wave normals  $\theta < 45^\circ$ , we use a validated analytical formula of bounce-  
 213 averaged electron diffusion coefficients from Artemyev et al. (2013). For small pitch an-  
 214 gle  $\alpha_{eq}$  approaching the loss cone  $\alpha_{LC}$ , the first-order cyclotron resonance provides the  
 215 main contribution to the bounce-averaged diffusion rate:

$$\langle D_{\alpha_{eq}\alpha_{eq}} \rangle \simeq \frac{\pi B_w^2 \Omega_{ceq} \omega_m}{4\gamma B_{eq}^2 \Delta\omega (p\epsilon_{meq})^{13/9} T(\alpha_{LC}) \cos^2 \alpha_{LC}} \times \frac{\Delta\lambda_{R,N} (1 + 3 \sin^2 \lambda_R)^{7/12} (1 - \bar{\omega})}{|\gamma\bar{\omega} - 2\gamma\bar{\omega}^2 + 1| |1 - \gamma\bar{\omega}|^{4/9}}, \quad (1)$$

216 with  $B_w$  indicating the wave amplitude,  $\omega_m$  the mean wave frequency,  $\Delta\omega$  the frequency  
 217 width,  $\bar{\omega} = \omega_m/\Omega_{ce}$  the normalized frequency,  $\Omega_{ce}$  and  $\Omega_{ceq}$  the local and equatorial  
 218 electron cyclotron frequency,  $\gamma$  the relativistic factor,  $p$  the electron momentum,  $\epsilon_{meq} =$   
 219  $\Omega_{pe}/\Omega_{ceq}\sqrt{\omega_m/\Omega_{ceq}}$  where  $\Omega_{pe}$  is the plasma frequency,  $T(\alpha_{eq})$  the bounce period,  $\lambda_R$   
 220 the latitude of resonance, and  $\Delta\lambda_{R,N}$  the latitudinal range of resonance (see details in  
 221 Artemyev et al. (2013)). The precipitating differential energy flux within the loss cone  
 222 can be estimated as  $x(E)J(E, \alpha_{LC})$ , where

$$x(E) = 2 \int_0^1 I_0(Z_0\tau)\tau d\tau / I_0(Z_0), \quad (2)$$

223 being the index of loss cone filling,  $J(E, \alpha_{LC})$  is the electron differential energy flux near  
 224 the loss cone,  $I_0$  is the modified Bessel function with an argument  $Z_0 \simeq \alpha_{LC} / \sqrt{\langle D_{\alpha_{eq}\alpha_{eq}} \rangle \cdot \tau_{loss}}$   
 225 (Kennel & Petschek, 1966), and  $\tau_{loss}$  is assumed to be half of the bounce period.

226 With an energy distribution of precipitating electrons within 0.1–30 keV, we es-  
 227 timate the impact ionization rate altitude profile using the parameterization model de-  
 228 veloped by Fang et al. (2010), covering isotropic electron precipitation from 100 eV up  
 229 to 1 MeV. This model, derived through fits to first-principle model results, allows effi-  
 230 cient ionization computation for arbitrary energy spectra. Atmospheric density and scale  
 231 height data were obtained from the NRLMSISE-00 model (Picone et al., 2002). We model  
 232 dTEC resulting from whistler-induced electron precipitation by integrating ionization  
 233 rates over altitude and time, adopting an 8-s integration period to align with the tem-  
 234 poral resolution of THEMIS wave spectra data. Although our analysis does not concern  
 235 equilibrium densities and omits recombination and convective effects, this has little im-  
 236 pact because we focus on relative dTEC due to short-time precipitation. It takes nearly  
 237 60 s for the background ionosphere to relax to an equilibrium density solution for 10-  
 238 keV precipitation and longer for lower energies (e.g., Kaeppler et al., 2022). Our esti-

239 mated dTEC also closely match observed dTEC values, underscoring the effectiveness  
 240 of our modeling approach despite its approximation.

### 241 3 Results

242 On July 3, 2013, from 15:06 to 16:36 UT, the THEMIS E spacecraft flew westward  
 243 over the FAIR GPS receiver station, coming within  $\sim 20$  km relative to FAIR when mapped  
 244 to 300 km altitude. The space-ground observations have a close spatial and temporal align-  
 245 ment, allowing us to link between magnetospheric and ionospheric processes along the  
 246 field line. The event occurred at  $L \sim 7$ , outside the plasmopause of  $L_{pp} \sim 5.4$  (based on  
 247 THEMIS E densities near 17:00 UT), near the magnetic local time (*MLT*) of 4.5 hr, and  
 248 during a geomagnetic quiet time with  $Kp \sim 1$  and  $AE \sim 200$  nT. Figure 2a illustrates  
 249 the trajectories of THEMIS E and the ionosphere pierce points of GPS40, GPS43, and  
 250 GPS60 near FAIR, mapped to 300 km altitude. The position of THEMIS E is mapped  
 251 along the field line to the ionosphere using the Tsyganenko T96 model (Tsyganenko, 1995)  
 252 but the GPS satellites are mapped using line of sight. Of these GPS satellites, the GPS43  
 253 pierce points, moving eastward, were nearest to both the FAIR and THEMIS E footprints,  
 254 exhibiting close longitudinal alignment. A notable conjugacy, marked by the bright red  
 255 segment from 15:37 to 16:11 UT, occurred when the footprints of THEMIS E and GPS43  
 256 pierce points were within  $\sim 100$  km to each other and FAIR (Figure 2j). In Supporting  
 257 Information, we also present the configuration when the satellites and their pierce points  
 258 are mapped to an altitude of 150 km. This adjustment does not significantly alter the  
 259 geometry of our conjunction event, but it does slightly reduce the scale of the satellite  
 260 footpaths near FAIR.

261 Figures 2b–2d present THEMIS observations of whistler-mode waves. The observed  
 262 wave frequencies were in the whistler lower band, spanning  $\sim 0.2$ – $0.5\Omega_{ce}$ , with a mean  
 263 frequency  $\omega_m \sim 0.35\Omega_{ce}$ , and  $\Delta\omega \sim 0.15\Omega_{ce}$ , where the electron cyclotron frequency  $f_{ce} \sim$   
 264  $\Omega_{ce}/2\pi \sim 2.15$  kHz. Figure 2d shows that whistler-mode wave amplitudes  $B_w$  range from  
 265 several pT to over 100 pT, measured at 8-s cadence (black curve) and smoothed with  
 266 2-min moving averages (red curve). Short-term oscillations in  $B_w$  on the order of tens  
 267 of seconds were observed atop more gradual variations of several minutes. We use smoothed  
 268 or averaged  $B_w$  to estimate electron precipitation. Although direct waveform data for  
 269 resolving whistler-mode wave normals were absent, we can infer wave normals based on  
 270 the measured whistler spectra properties of  $E/cB \ll 1$  (see Supporting Information) as

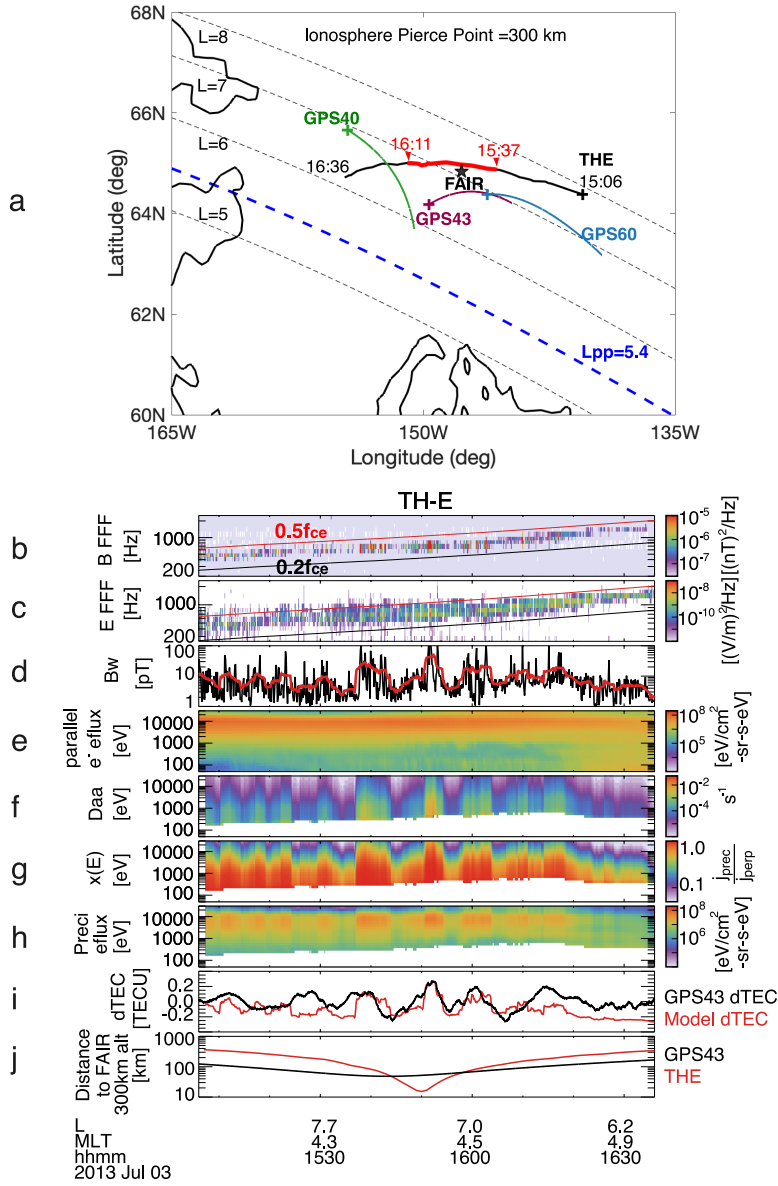

**Figure 2.** (a) Configuration of THEMIS E (black curve), GPS40, GPS43, and GPS60 satellites (green, purple, and blue curves), and the FAIR receiver (black star) in geographic coordinates, with THEMIS and GPS mapped onto 300 km altitude using T96 field tracing (THEMIS) or line of sight projection (GPS). The plus symbol indicates the start of the footpath. (b–e) THEMIS E magnetic field spectrogram, electric field spectrogram, whistler-mode wave amplitudes, and field-aligned ( $0^{\circ}$ – $22.5^{\circ}$ ) electron energy spectrogram. (f) Bounce-averaged electron diffusion rates. (g) Index of loss cone filling. (h) Whistler-driven precipitating electron energy spectrogram. (i) Comparison of whistler-driven model dTEC (red curve) and GPS43-observed dTEC (black curve). (j) Great-circle distances between THEMIS-E footpath (red curve) and GPS43 raypath (black curve) at IPP of 300 km relative to the FAIR station.

271 well as from previous statistical whistler observations in the nightside equatorial plasma  
 272 sheet (W. Li, Bortnik, Thorne, & Angelopoulos, 2011; Agapitov et al., 2013; Meredith  
 273 et al., 2021). The whistlers propagate quasi-parallel to the magnetic field, with an as-  
 274 sumed Gaussian wave normal width of  $\Delta\theta \sim 30^\circ$  and a latitudinal distribution within  
 275  $\pm 30^\circ$ .

276 Figures 2e–2h display the measured plasma sheet field-aligned ( $\alpha \sim [0^\circ, 22.5^\circ]$ ) elec-  
 277 trons from 50 eV up to 25 keV, calculated diffusion rates  $\langle D_{\alpha_{eq}\alpha_{eq}} \rangle$ , estimated loss cone  
 278 filling  $x(E)$ , and precipitating electron energy fluxes. Although  $\langle D_{\alpha_{eq}\alpha_{eq}} \rangle$  and  $x(E)$  in-  
 279 crease at lower energies, the precipitating energy fluxes peak between 1–10 keV, exhibit-  
 280 ing similar modulations as seen in the smoothed whistler-mode wave amplitude  $B_w$ . Elec-  
 281 tron precipitation fluxes below  $\sim 200$  eV are absent due to an energy threshold for elec-  
 282 tron cyclotron resonance interaction, with the lower limit primarily determined by the  
 283 ratio  $\Omega_{pe}/\Omega_{ce}$  ( $\sim 3$  in our case).

284 Figure 2i compares modeled (red) and directly measured dTEC (black) from the  
 285 GPS43 signal, revealing a nearly one-to-one phase correlation from 15:37 to 16:11 UT.  
 286 This period of close correlation coincides with the conjunction of THEMIS E, GPS43,  
 287 and FAIR, where their relative distances were within  $\sim 100$  km (Figure 2j). Outside this  
 288 conjugacy period and further away from the FAIR station, the correlation decreases. Ob-  
 289 served peak-to-peak amplitudes of dTEC reached  $\sim 0.5$  TECU, which is typical, though  
 290 not extreme, for the nightside auroral region. This particular event occurred during quiet  
 291 conditions; other events during storms may have much larger dTEC modulation ampli-  
 292 tudes (e.g., Watson et al., 2015), though more challenging to have such reliable conjunc-  
 293 tion, especially given uncertainties in magnetic field mapping during storms (e.g., C.-L. Huang  
 294 et al., 2008).

295 Figure 3 underscores the critical role of observation geometry and timing in detect-  
 296 ing phase correlations between modeled and measured dTEC across three GPS satellites.  
 297 Despite all three satellites having raypath elevation angles  $> 40^\circ$ —reducing the likelihood  
 298 of multi-path effects (e.g., Jakowski et al., 1996)—only the GPS43 elevation reached  $80^\circ$   
 299 above the FAIR station zenith (Figure 3a). During the conjugacy period, the pierce points  
 300 of GPS40 and GPS60 were distanced from FAIR by more than 200 km, while GPS43’s  
 301 pierce points remained within 100 km, coming within 20 km at its closest point (Figure 3b).  
 302 Figures 3c and 3d reveal that the modeled dTEC (red curve) aligns poorly with GPS40

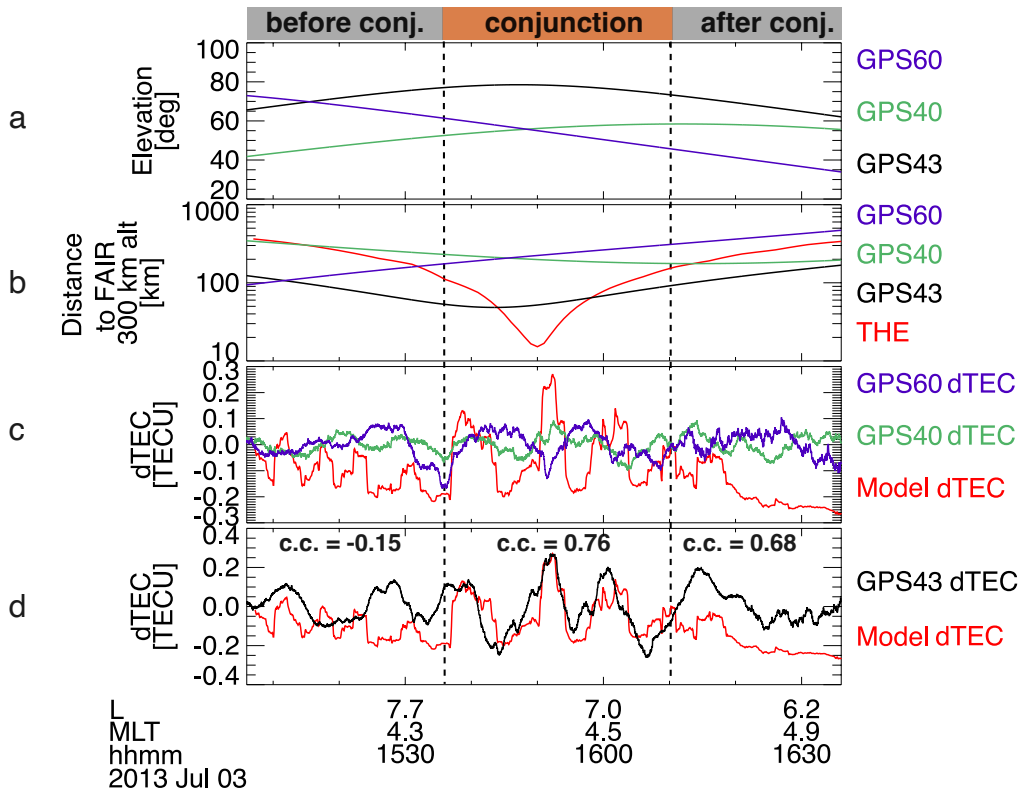

**Figure 3.** (a) Raypath elevation angles of GPS40 (green curve), GPS43 (black curve), and GPS60 (magenta curve). (b) Distances between THEMIS E footpath and GPS satellite pierce points relative to FAIR, displayed in the same format as Figure 1j. (c) Comparison between whistler-driven model dTEC and observed dTEC from GPS40 and GPS60, which were not in good conjunction with THEMIS or FAIR. (d) Comparison between whistler-driven model dTEC and GPS43-observed dTEC. The cross-correlation coefficients are -0.15, 0.76, and 0.68 during intervals before, during, and after conjunction, respectively.

303 and GPS60 dTEC (blue and magenta curves), but a significant cross-correlation ( $\sim 0.8$ )  
 304 emerges with GPS43 dTEC (black) during the conjugacy period. Before and after the  
 305 conjunction, dTEC phase shifts reduce the cross-correlation to  $-0.15$  and  $0.68$ , respec-  
 306 tively. Given the near-parallel longitudinal alignment of GPS43 pierce points and THEMIS  
 307 E footprints (Figure 2a), the measured dTEC (black) potentially reflects both tempo-  
 308 ral and spatial/longitudinal modulations. These findings suggest that to reliably iden-  
 309 tify the electron precipitation responsible for dTEC requires precise spacecraft spatial  
 310 alignment, optimal timing, and high raypath elevations.

311 The modulation of dTEC, electron precipitation, and whistler-mode wave ampli-  
 312 tudes was linked to ULF wave activities in the Pc3-5 band (1.7 mHz to 100 mHz). Fig-  
 313 ure 4a display the magnetic field perturbations measured by THEMIS E in the mean field-  
 314 aligned coordinates, in which the parallel direction ( $\parallel$ , the compressional component)  
 315 is determined by 15-minute sliding averages of the magnetic field, the azimuthal direc-  
 316 tion ( $\phi$ , the toroidal component) is along the cross product of  $z$  and the spacecraft geo-  
 317 centric position vector, and the radial direction ( $r$ , the poloidal component) completes  
 318 the triad. Magnetic perturbations are obtained by subtracting the 15-minute mean field.  
 319 During the conjunction, THEMIS E detected both compressional Pc5 waves (red curve)  
 320 and poloidal Pc3-4 waves (blue curve). Figure 4b indicates that peaks in whistler-mode  
 321 wave amplitudes approximately align with troughs of compressional ULF waves, with  
 322 fine-scale whistler amplitudes primarily modulated by poloidal Pc3-4 waves (See Sup-  
 323 porting Information). Strong Pc5 ULF waves were also recorded in the  $H$ -component  
 324 magnetic field perturbations from magnetometers located at CMO and FYKN (Figures 4g-  
 325 4h), displaying a similar pattern but with greater amplitudes at FYKN, located slightly  
 326 north of FAIR. The discrepancy between ground- and space-measured Pc5 waves poten-  
 327 tially results from the localized nature of THEMIS-E observations (X. Shi et al., 2022)  
 328 and the screening/modification effects of ULF waves traversing the ionosphere (Hughes  
 329 & Southwood, 1976; Lysak, 1991; Lessard & Knudsen, 2001; X. Shi et al., 2018). Our  
 330 observations imply that the ionospheric dTEC were linked to ULF-modulated whistler-  
 331 mode waves and the associated electron precipitation (e.g., Coroniti & Kennel, 1970; W. Li,  
 332 Thorne, et al., 2011; Xia et al., 2016; X. J. Zhang et al., 2020; L. Li et al., 2023).

333 Figures 4b-4c compare small-scale/high-frequency fluctuations of whistler-mode  
 334 wave amplitudes  $B_w$  and dTEC, which was bandpass-filtered within the frequency range  
 335 of 5-200 mHz. The small-scale dTEC fluctuations exhibit similar wave periods to  $B_w$

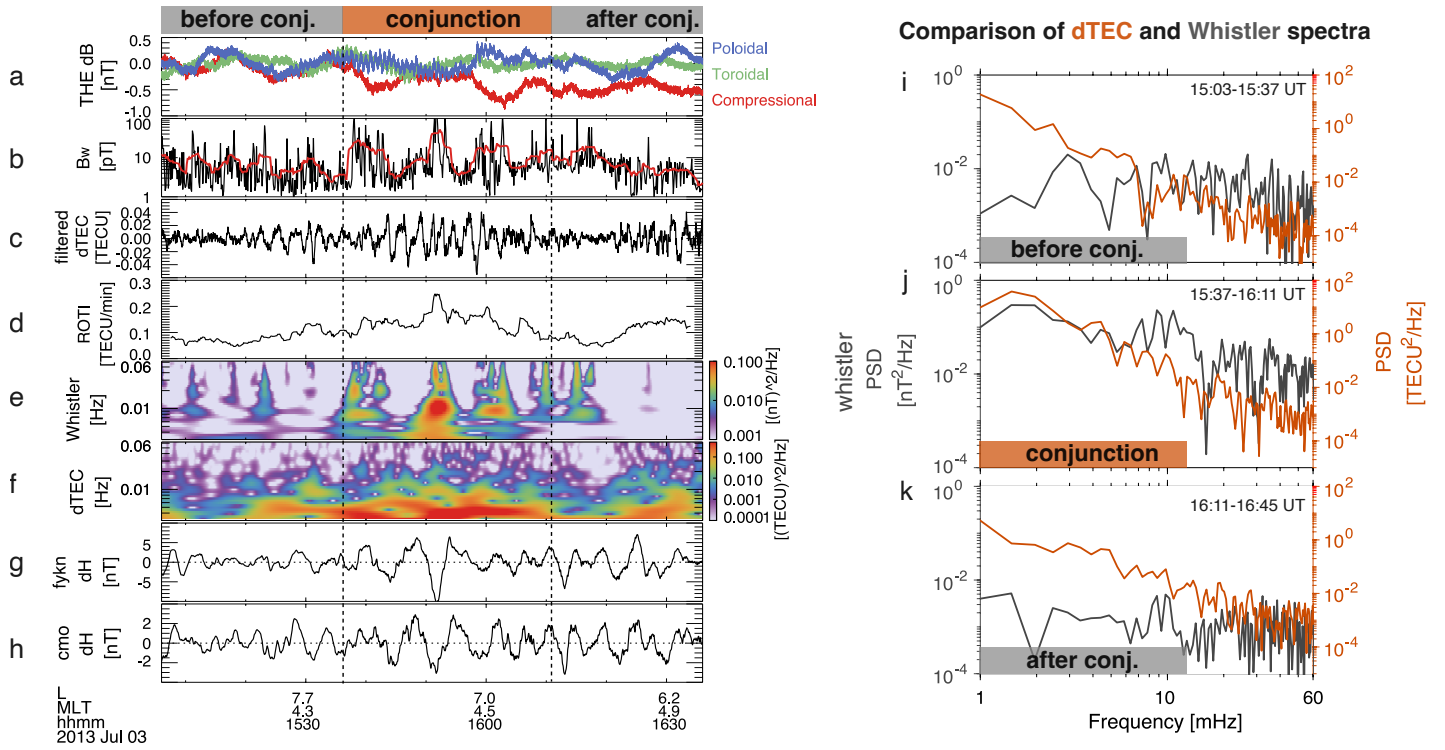

**Figure 4.** (a) THEMIS E magnetic field perturbations in the mean-field-aligned coordinates, exhibiting compressional- (red) and poloidal-mode (blue) variations. (b) THEMIS E whistler-mode wave amplitudes. The measured amplitudes are shown in black and smoothed in red. (c) dTEC bandpass filtered within 5–200 mHz. (d) ROTI from 200-s sliding window ensemble averaging. (e) Wavelet spectrogram of whistler-mode waves. (f) Wavelet spectrogram of GPS43 dTEC. (g) Ground-based magnetic field  $H$  component perturbations in 1.7–100 mHz from the Fort Yukon station. (h) Ground-based magnetic  $H$  component perturbations in 1.7–100 mHz from the College station. (i–k) Comparisons of dTEC (orange curves) and whistler-mode wave amplitude fluctuation spectra (gray curves) in 1–60 mHz measured before (i), during (j), and after (k) the conjugacy period.

336 fluctuations, evidently intensifying during the conjugacy period, yet lacking a clear phase  
 337 correlation seen with larger scale perturbations in Figure 3d. Figure 4d shows the rate  
 338 of TEC index (*ROTI*), i.e., the standard deviation of the rate of TEC (*ROT*) (Pi et al.,  
 339 1997), where  $ROT = (dTEC(t+\tau) - dTEC(t))/\tau$  with  $\tau = 10$  s,  $ROTI = \sqrt{\langle ROT^2 \rangle - \langle ROT \rangle^2}$   
 340 using 200-s sliding averages. Significant increases in *ROTI* were observed within the re-  
 341 gion of whistler-driven TEC perturbations. However, in our case the GPS signal fluc-  
 342 tuations were predominantly refractive, as negligible fluctuations were detected at fre-  
 343 quencies above 0.1 Hz (McCaffrey & Jayachandran, 2017, 2019; Nishimura et al., 2023).

344 Figures 4e–4f compare the wavelet spectrograms of whistler-mode wave  $B_w$  and dTEC,  
 345 displaying concurrent increases in wave power for both in the frequency range of  $\sim 3$  mHz  
 346 up to tens of mHz. Figures 4i–4k present a more detailed amplitude spectra compari-  
 347 son before, during, and after conjunction. Notably, only during the conjunction, whistler-  
 348 mode wave amplitudes and dTEC share similar power spectral density distributions in  
 349 the 1– $\sim 30$  mHz range. The peaks in whistler spectra were slightly and consistently larger  
 350 than those in dTEC spectra within 3–20 mHz by factors of 1.05–1.2 with an average of  
 351 1.15, aligning with expected Doppler shift effects on ionospheric TEC measurements. The  
 352 Doppler shift results from relative motion of GPS raypath (with pierce point velocities  
 353 of  $\sim 46$  m/s at 300 km altitude in our case) and propagating TEC structures (typically  
 354 with velocities of several hundred m/s) (Watson, Jayachandran, & MacDougall, 2016):  
 355  $f_{cor} = f_{obs} (1 + \frac{\mathbf{v}_{ipp} \cdot \mathbf{v}_{struct}}{|\mathbf{v}_{struct}|^2})$ , where  $f_{cor}$  is the frequency corrected for relative motion.  
 356 Watson, Jayachandran, and MacDougall (2016) found that 89% of their statistical events  
 357 required a correction factor of 1.2 or less for the Doppler shift, consistent with our ob-  
 358 servations. The agreement between dTEC and whistler amplitude spectra supports that  
 359 the observed dTEC resulted from electron precipitation induced by whistler-mode waves.

360 The average Doppler shift factor of  $\sim 1.15$  obtained from Figure 4j allows us to es-  
 361 timate the plasma drift velocity from  $\vec{v}_{struct} \sim \vec{v}_{ipp}/0.15 \simeq 300$  m/s at the pierce point  
 362 of 300 km altitude or 150 m/s at 150 km altitude. The spatial scales of the small-scale  
 363 dTEC in Figure 4c can be estimated from  $ds = (|\vec{v}_{struct}| - |\vec{v}_{ipp}|)dt$ . The resulting wave-  
 364 lengths are  $\sim 10$ – $30$  km at the pierce point of 300 km altitude or  $\sim 5$ – $15$  km at 150 km  
 365 altitude. In contrast, the larger-scale dTEC shown in Figure 3d have wavelengths of  $\sim 100$   
 366 km at 300 km altitude or  $\sim 50$  km at 150 km altitude. When mapped to the magneto-  
 367 sphere, the small-scale dTEC modulations correspond to a magnetospheric source region  
 368 of  $\sim 150$ – $700$  km, while larger-scale dTEC modulations suggest a source region of  $\sim 1000$ –



369 2500 km. These scales align with prior observations of the transverse scale sizes of cho-  
 370 rus elements and their source regions (Santolík et al., 2003; Agapitov et al., 2017, 2018)  
 371 and also with the azimuthal wavelengths of high- $m$  poloidal ULF waves (Yeoman et al.,  
 372 2012; X. Shi et al., 2018; Zong et al., 2017).

373 Figure 5 indicates that the electron precipitation, induced by ULF-modulated whistler-  
 374 mode waves, can cause significant increases in ionospheric ionization rate or column den-  
 375 sity, leading to dTEC of  $\sim 0.36$  TECU with a moderate whistler amplitude of  $B_w \sim 25$   
 376 pT. Given that large-amplitude whistler-mode waves exceeding several hundred pT fre-  
 377 quently occur in the inner magnetosphere (Cattell et al., 2008; Cully, Bonnell, & Ergun,  
 378 2008; Agapitov et al., 2014; Hartley et al., 2016; R. Shi et al., 2019), we anticipate even  
 379 larger dTEC from such whistler activities. We defer a statistical study including storm  
 380 time events and the potential connection with scintillation (e.g., McCaffrey & Jayachan-  
 381 dran, 2019; Nishimura et al., 2023) for the future. In addition, the primary energy range  
 382 of precipitation spans from  $\sim 100$  eV to  $\sim 30$  keV, contributing to density variations be-  
 383 tween  $\sim 90$ – $\sim 400$  km (Fang et al., 2010; Katoh et al., 2023; Berland et al., 2023).

#### 384 4 Discussion

385 Various mechanisms have been proposed that link ULF waves to dTEC and iono-  
 386 spheric disturbances in general (Pilipenko et al., 2014). Although dTEC might arise from  
 387 direct ULF wave effects through convective and divergent flows, MHD Alfvén-mode waves  
 388 do not directly alter plasma density. Furthermore, mode-converted compressional waves,  
 389 if present due to Hall currents, are evanescent in the ionosphere (Lessard & Knudsen,  
 390 2001), resulting in negligible TEC perturbations (Pilipenko et al., 2014).

391 The vertical component of the  $\vec{E} \times \vec{B}$  drift associated with ULF waves can induce  
 392 vertical bulk motion of ionospheric plasma with a drift velocity  $v_z = E_y \cos I / B_0$ , where  
 393  $I$  is the local magnetic inclination. This vertical transport can alter the altitude-dependent  
 394 recombination rate, thereby contributing to electron density or TEC modulations (Poole  
 395 & Sutcliffe, 1987; Pilipenko et al., 2014). These effects are potentially important in mid-  
 396 latitude and equatorial regions (Yizengaw et al., 2018; Zou et al., 2017) but are expected  
 397 to be less significant at high latitudes where the magnetic inclination is large. In our case,  
 398 the magnetic inclination angle is such that  $\cos I \sim 0.2$ , and the magnetic perturbations  
 399 are only a few nT, resulting in electric field perturbations  $E_y < 1$  mV/m (Yizengaw et

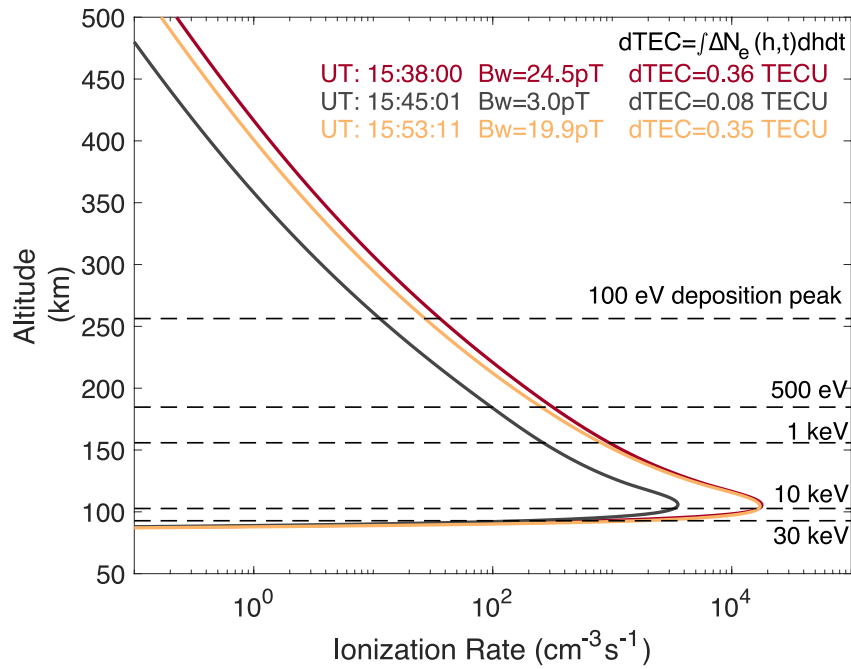

**Figure 5.** Ionization rate altitude profiles calculated at three time stamps of 15:38:00, 15:45:01, and 15:53:11 UT, corresponding to whistler-mode wave amplitudes of  $B_w = 24.5$  pT (red curve), 3.0 pT (gray curve), and 19.9 pT (orange curve). The dTEC were calculated by integrating ionization rates over altitude and time (8s). The dashed lines mark the peak deposition altitudes of 100 eV, 500 eV, 1 keV, 10 keV, and 30 keV precipitating monoenergetic electrons.

400 al., 2018). Based on similar estimations from Pilipenko et al. (2014), the resulting changes  
 401 in  $dn_e/n_e$  or  $d\text{TEC}/\text{TEC}$  are only 0.04%, corresponding to  $d\text{TEC}$  of  $<0.01$  TECU given  
 402 a background TEC of  $\sim 20$  TECU. This level of  $d\text{TEC}$  is insignificant compared with the  
 403 observed 0.5 TECU. Moreover, the timescales of TEC changes due to recombination rate  
 404 changes associated with vertical plasma motion are typically longer than 1 hour (Yizengaw  
 405 et al., 2006; Maruyama et al., 2004; Heelis et al., 2009), which are much larger than the  
 406 ULF modulation timescales of several minutes observed in our case. Therefore, the ob-  
 407 served ULF-modulated high-latitude  $d\text{TEC}$  are unlikely to be explained by vertical plasma  
 408 transport and recombination rate changes in the F region.

409 The periodic horizontal drift of ULF waves could produce noticeable TEC mod-  
 410 ulation across a horizontal density gradient, via the advection term  $\vec{v} \cdot \nabla n_e$  (Poole &  
 411 Sutcliffe, 1987; Waters & Cox, 2009; Pilipenko et al., 2014). This modulation may be  
 412 enabled by a pre-existing east-west density gradient, which was suggested to produce TEC  
 413 modulation of  $\sim 2\%$  with 5 nT magnetic perturbations near the terminator (Waters &  
 414 Cox, 2009). However, our event was on the nightside, away from the terminator. The  
 415 advection may arise from a latitudinal density gradient coupled with ULF  $\vec{E} \times \vec{B}$  drifts.  
 416 Pilipenko et al. (2014) estimated that this latitudinal advection could contribute to  $d\text{TEC}/\text{TEC}$   
 417 of  $\sim 0.1\%$  at auroral latitudes, corresponding to  $d\text{TEC} \sim 0.02$  TECU in our case. In gen-  
 418 eral, Poole and Sutcliffe (1987) theoretically derived the advection-induced TEC mod-  
 419 ulation as  $d\text{TEC}/\text{TEC} \sim 2E_y/\omega B_0 L$ , where  $L$  is the horizontal gradient scale. If we take  
 420  $E_y \sim 1$  mV/m,  $\omega \sim 10^{-2}$  s $^{-1}$ ,  $L \sim 30$  km, the resulting  $d\text{TEC}/\text{TEC}$  is only 0.17%. Thus,  
 421 ULF-induced horizontal transport also cannot explain our observed  $d\text{TEC}$  modulation  
 422 of  $\sim 0.5$  TECU.

423 A non-linear "feedback instability" mechanism may modify ULF wave dynamics,  
 424 causing field-aligned current striations and significant bottom-side ionospheric density  
 425 cavities and gradients (Lysak, 1991; Streltsov & Lotko, 2008). Furthermore, in the pres-  
 426 ence of pre-existing larger-scale density gradients, ULF-induced plasma flows may re-  
 427 sult in gradient drift instabilities and density striations and irregularities with scale sizes  
 428 less than  $\sim 10$  km (Keskinen & Ossakow, 1983; Basu et al., 1990; Gondarenko & Guz-  
 429 dar, 2004; Kelley, 2009; Spicher et al., 2015; Nishimura et al., 2021). Additionally, elec-  
 430 tron precipitation and Joule heating are important factors to consider in the auroral re-  
 431 gion (e.g., Deng & Ridley, 2007; Sheng et al., 2020; Meng et al., 2022).

432 Detecting one-to-one phase correlation between ground-based ULF waves and dTEC  
433 may be challenging, largely due to ionospheric screening effects on ULF waves (Hughes  
434 & Southwood, 1976), with only a few exceptions noted during storm times (Pilipenko  
435 et al., 2014; Wang et al., 2020). However, this correlation has been frequently observed  
436 with spacecraft measurements of ULF waves (Watson et al., 2015; Watson, Jayachan-  
437 dran, Singer, et al., 2016; Zhai et al., 2021), indicating that magnetospheric processes  
438 may play an important role in driving ionospheric dTEC. Our findings support that mag-  
439 netospheric whistler-mode waves, modulated by ULF waves in the Pc3–5 band, are re-  
440 sponsible for these periodic dTEC through associated electron precipitation.

441 These results enhance our understanding of dTEC modulation by ULF waves, a  
442 topic widely discussed in the literature (Skone, 2009; Pilipenko et al., 2014; Watson et  
443 al., 2015; Watson, Jayachandran, Singer, et al., 2016; Wang et al., 2020; Zhai et al., 2021),  
444 and facilitates the integration of effects of magnetospheric whistler-mode waves into au-  
445 roral dTEC models. Statistical modeling of whistler-mode and ULF waves has been im-  
446 proving for several decades (e.g., Tsurutani & Smith, 1974; McPherron, 1972; Southwood  
447 & Hughes, 1983; Takahashi & Anderson, 1992; M. Hudson et al., 2004; Claudepierre et  
448 al., 2010; W. Li, Bortnik, Thorne, & Angelopoulos, 2011; Agapitov et al., 2013; Arte-  
449 myev et al., 2016; Tyler et al., 2019; Zong et al., 2017; Ma et al., 2020; X. J. Zhang et  
450 al., 2020; Shen et al., 2021; Sandhu et al., 2021; Hartinger et al., 2015, 2022, 2023). Lever-  
451 aging these wave effects and the associated electron precipitation can enhance physics-  
452 based modeling of ionospheric dTEC by providing better specifications of high-latitude  
453 drivers (Schunk et al., 2004; Ridley et al., 2006; Zettergren & Snively, 2015; Meng et al.,  
454 2016, 2020; Sheng et al., 2020; Verkhoglyadova et al., 2020; Huba & Drob, 2017). This  
455 wave-driven precipitation provides the dominant energy input to the ionosphere among  
456 all types of auroral precipitation (e.g., Newell et al., 2009), thus critically contributing  
457 to dTEC at high latitudes. As such, incorporating these magnetospheric phenomena is  
458 important for improving the accuracy of ionospheric dTEC models. This incorporation  
459 potentially benefits both GNSS-based applications and magnetosphere and ionosphere  
460 coupling science.

## 461 5 Conclusions

462 We present a detailed case study of ionospheric dTEC, using magnetically-conjugate  
463 observations from the THEMIS spacecraft and the GPS receiver at Fairbanks, Alaska.

464 This conjunction setup allows us to identify the magnetospheric driver of the observed  
465 dTEC. Our key findings are summarized below:

- 466 • Combining in-situ wave and electron observations and quasilinear theory, we have  
467 modeled the electron precipitation induced by observed whistler-mode waves and  
468 deduced ionospheric dTEC based on impact ionization prediction. The cross-correlation  
469 between our modeled and observed dTEC reached  $\sim 0.8$  during the conjugacy pe-  
470 riod of  $\sim 30$  min but decreased outside of it.
- 471 • Observed peak-to-peak dTEC amplitudes reached  $\sim 0.5$  TECU, exhibiting mod-  
472 ulations spanning scales of  $\sim 5$ – $100$  km. Within the modulated dTEC, enhance-  
473 ments in the rate of TEC index were measured to be  $\sim 0.2$  TECU/min.
- 474 • The whistler-mode waves and dTEC modulations were linked to ULF waves in the  
475 Pc3-5 band, featuring concurrent compressional and poloidal mode fluctuations.  
476 The amplitude spectra of whistler-mode waves and dTEC also agreed from 1 MHz  
477 to tens of MHz during the conjugacy period but diverged outside of it.

478 Thus, our results provide direct evidence that ULF-modulated whistler-mode waves  
479 in the magnetosphere drive electron precipitation leading to ionospheric dTEC modu-  
480 lations. Our observations also indicate that to reliably identify the electron precipita-  
481 tion responsible for dTEC requires precise spacecraft spatial alignment, optimal timing,  
482 and high raypath elevations. Our findings elucidate the high-latitude dTEC generation  
483 from magnetospheric wave-induced precipitation, which has not been adequately addressed  
484 in physics-based TEC models. Consequently, these results improve ionospheric dTEC  
485 prediction and enhance our understanding of magnetosphere-ionosphere coupling via ULF  
486 waves.

## 487 **Acknowledgments**

488 This work has been supported by NASA projects 80NSSC23K0413, 80NSSC24K0138,  
489 and 80NSSC23K1038. Portions of the research were carried out at the Jet Propulsion  
490 Laboratory, California Institute of Technology, under a contract with NASA. O.P.V., M.D.H.,  
491 and X.S. were supported by NASA project 80NSSC21K1683. O.P.V would like to thank  
492 A.W. Moore (JPL) for data processing discussions. We are indebted to Emmanuel Ma-  
493 songsong for help with the schematic figure.

## 494 Conflict of Interest

495 The authors declare no conflict of interest relevant to this study.

## 496 Open Research

497 THEMIS data are available at <http://themis.ssl.berkeley.edu/data/themis/the/12/>. GPS RINEX data are publicly available from the NASA CDDIS archive of space  
 498 geodesy data ([https://cddis.nasa.gov/Data\\_and\\_Derived\\_Products/GNSS/high-rate\\_data.html](https://cddis.nasa.gov/Data_and_Derived_Products/GNSS/high-rate_data.html)). TEC data derived for this study is available at [https://doi.org/10.48577/](https://doi.org/10.48577/jpl.LGI5JS)  
 499 [jpl.LGI5JS](https://doi.org/10.48577/jpl.LGI5JS) (Verkhoglyadova, 2024). The access and processing of THEMIS and ground-  
 500 based magnetic field data from CMO and FYKN was done using SPEDAS V4.1, see Angelopoulos  
 501 et al. (2019). The original CMO data are provided by the USGS Geomagnetism Program  
 502 (<http://geomag.usgs.gov>) but can be accessed through [http://themis.ssl.berkeley](http://themis.ssl.berkeley.edu/data/themis/thg/12/mag/cmo/2013/)  
 503 [.edu/data/themis/thg/12/mag/cmo/2013/](http://themis.ssl.berkeley.edu/data/themis/thg/12/mag/cmo/2013/). FYKN data are part of the Geophysical  
 504 Institute Magnetometer Array operated by the Geophysical Institute, University of Alaska  
 505 (<https://www.gi.alaska.edu/monitors/magnetometer/archive>). The ionosonde data  
 506 from the Eielson station is available from <https://giro.uml.edu/ionoweb/>.  
 507  
 508

## 509 Materials and Methods

510 Y. Shen acknowledges the use of the tool of ChatGPT4 to assist with text editing  
 511 for some sentences of the Introduction and Results.

## 512 References

- 513 Aa, E., Zou, S., Eastes, R., Karan, D. K., Zhang, S.-R., Erickson, P. J., & Coster,  
 514 A. J. (2020, January). Coordinated Ground-Based and Space-Based Observa-  
 515 tions of Equatorial Plasma Bubbles. *Journal of Geophysical Research (Space*  
 516 *Physics)*, *125*(1), e27569. doi: 10.1029/2019JA027569
- 517 Agapitov, O. V., Artemyev, A., Krasnoselskikh, V., Khotyaintsev, Y. V., Mouren-  
 518 as, D., Breuillard, H., ... Rolland, G. (2013, June). Statistics of whistler  
 519 mode waves in the outer radiation belt: Cluster STAFF-SA measurements. *J.*  
 520 *Geophys. Res.*, *118*, 3407-3420. doi: 10.1002/jgra.50312
- 521 Agapitov, O. V., Artemyev, A., Mourenas, D., Krasnoselskikh, V., Bonnell, J., Le

- 522 Contel, O., . . . Angelopoulos, V. (2014). The quasi-electrostatic mode of  
 523 chorus waves and electron nonlinear acceleration. *J. Geophys. Res.*, *119*,  
 524 1606–1626. doi: 10.1002/2013JA019223
- 525 Agapitov, O. V., Blum, L. W., Mozer, F. S., Bonnell, J. W., & Wygant, J. (2017,  
 526 March). Chorus whistler wave source scales as determined from multipoint  
 527 Van Allen Probe measurements. *Geophys. Res. Lett.*, *44*, 2634-2642. doi:  
 528 10.1002/2017GL072701
- 529 Agapitov, O. V., Mourenas, D., Artemyev, A., Mozer, F. S., Bonnell, J. W., An-  
 530 gelopoulos, V., . . . Krasnoselskikh, V. (2018, October). Spatial Extent and  
 531 Temporal Correlation of Chorus and Hiss: Statistical Results From Multipoint  
 532 THEMIS Observations. *Journal of Geophysical Research (Space Physics)*,  
 533 *123*(10), 8317-8330. doi: 10.1029/2018JA025725
- 534 Angelopoulos, V. (2008, December). The THEMIS Mission. *Space Sci. Rev.*, *141*, 5-  
 535 34. doi: 10.1007/s11214-008-9336-1
- 536 Angelopoulos, V., Cruce, P., Drozdov, A., Grimes, E. W., Hatzigeorgiu, N., King,  
 537 D. A., . . . Schroeder, P. (2019, January). The Space Physics Environ-  
 538 ment Data Analysis System (SPEDAS). *Space Sci. Rev.*, *215*, 9. doi:  
 539 10.1007/s11214-018-0576-4
- 540 Artemyev, A. V., Agapitov, O., Mourenas, D., Krasnoselskikh, V., Shastun, V., &  
 541 Mozer, F. (2016, April). Oblique Whistler-Mode Waves in the Earth’s Inner  
 542 Magnetosphere: Energy Distribution, Origins, and Role in Radiation Belt Dy-  
 543 namics. *Space Sci. Rev.*, *200*(1-4), 261-355. doi: 10.1007/s11214-016-0252-5
- 544 Artemyev, A. V., Mourenas, D., Agapitov, O. V., & Krasnoselskikh, V. V. (2013,  
 545 April). Parametric validations of analytical lifetime estimates for radiation belt  
 546 electron diffusion by whistler waves. *Annales Geophysicae*, *31*, 599-624. doi:  
 547 10.5194/angeo-31-599-2013
- 548 Astafyeva, E. (2019, December). Ionospheric Detection of Natural Hazards. *Reviews*  
 549 *of Geophysics*, *57*(4), 1265-1288. doi: 10.1029/2019RG000668
- 550 Auster, H. U., Glassmeier, K. H., Magnes, W., Aydogar, O., Baumjohann,  
 551 W., Constantinescu, D., . . . Wiedemann, M. (2008, December). The  
 552 THEMIS Fluxgate Magnetometer. *Space Sci. Rev.*, *141*, 235-264. doi:  
 553 10.1007/s11214-008-9365-9
- 554 Basu, S., Groves, K. M., Basu, S., & Sultan, P. J. (2002, November). Specification

- 555 and forecasting of scintillations in communication/navigation links: current  
 556 status and future plans. *Journal of Atmospheric and Solar-Terrestrial Physics*,  
 557 *64*(16), 1745-1754. doi: 10.1016/S1364-6826(02)00124-4
- 558 Basu, S., MacKenzie, E., Basu, S., Coley, W. R., Sharber, J. R., & Hoegy, W. R.  
 559 (1990, June). Plasma structuring by the gradient drift instability at high lati-  
 560 tudes and comparison with velocity shear driven processes. *J. Geophys. Res.*,  
 561 *95*(A6), 7799-7818. doi: 10.1029/JA095iA06p07799
- 562 Berland, G. D., Marshall, R. A., Capannolo, L., McCarthy, M. P., & Zheng, L.  
 563 (2023, November). Kinetic Modeling of Radiation Belt Electrons With Geant4  
 564 to Study Energetic Particle Precipitation in Earth's Atmosphere. *Earth and*  
 565 *Space Science*, *10*(11), e2023EA002987. doi: 10.1029/2023EA002987
- 566 Bertiger, W., Bar-Sever, Y., Dorsey, A., Haines, B., Harvey, N., Hemberger, D., ...  
 567 Willis, P. (2020, August). GipsyX/RTGx, a new tool set for space geodetic  
 568 operations and research. *Advances in Space Research*, *66*(3), 469-489. doi:  
 569 10.1016/j.asr.2020.04.015
- 570 Bonnell, J. W., Mozer, F. S., Delory, G. T., Hull, A. J., Ergun, R. E., Cully, C. M.,  
 571 ... Harvey, P. R. (2008, December). The Electric Field Instrument (EFI) for  
 572 THEMIS. *Space Sci. Rev.*, *141*, 303-341. doi: 10.1007/s11214-008-9469-2
- 573 Cattell, C., Wygant, J. R., Goetz, K., Kersten, K., Kellogg, P. J., von Rosenvinge,  
 574 T., ... Russell, C. T. (2008, January). Discovery of very large amplitude  
 575 whistler-mode waves in Earth's radiation belts. *Geophys. Res. Lett.*, *35*, 1105.  
 576 doi: 10.1029/2007GL032009
- 577 Cherniak, I., Krankowski, A., & Zakharenkova, I. (2014, August). Observation of  
 578 the ionospheric irregularities over the Northern Hemisphere: Methodology and  
 579 service. *Radio Science*, *49*(8), 653-662. doi: 10.1002/2014RS005433
- 580 Ciruolo, L., Azpilicueta, F., Brunini, C., Meza, A., & Radicella, S. M. (2007). Cali-  
 581 bration errors on experimental slant total electron content (TEC) determined  
 582 with GPS. *Journal of Geodesy*, *81*, 111-120.
- 583 Claudepierre, S. G., Hudson, M. K., Lotko, W., Lyon, J. G., & Denton, R. E. (2010,  
 584 November). Solar wind driving of magnetospheric ULF waves: Field line res-  
 585 onances driven by dynamic pressure fluctuations. *Journal of Geophysical Re-*  
 586 *search (Space Physics)*, *115*(A11), A11202. doi: 10.1029/2010JA015399
- 587 Coroniti, F. V., & Kennel, C. F. (1970, March). Electron precipitation pulsations.



- 588 *J. Geophys. Res.*, 75(7), 1279-1289. doi: 10.1029/JA075i007p01279
- 589 Coster, A. J., & Yizengaw, E. (2021). Gnss/gps degradation from space weather.  
590 In *Space weather effects and applications* (p. 165-181). American Geophysical  
591 Union (AGU). doi: <https://doi.org/10.1002/9781119815570.ch8>
- 592 Cully, C. M., Bonnell, J. W., & Ergun, R. E. (2008, June). THEMIS observations  
593 of long-lived regions of large-amplitude whistler waves in the inner magneto-  
594 sphere. *Geophys. Res. Lett.*, 35, 17. doi: 10.1029/2008GL033643
- 595 Cully, C. M., Ergun, R. E., Stevens, K., Nammari, A., & Westfall, J. (2008, Decem-  
596 ber). The THEMIS Digital Fields Board. *Space Sci. Rev.*, 141, 343-355. doi:  
597 10.1007/s11214-008-9417-1
- 598 Davies, K., & Hartmann, G. K. (1976, July). Short-period fluctuations in total  
599 columnar electron content. *J. Geophys. Res.*, 81(19), 3431. doi: 10.1029/  
600 JA081i019p03431
- 601 Deng, Y., & Ridley, A. J. (2007, September). Possible reasons for underestimat-  
602 ing Joule heating in global models: E field variability, spatial resolution, and  
603 vertical velocity. *Journal of Geophysical Research (Space Physics)*, 112(A9),  
604 A09308. doi: 10.1029/2006JA012006
- 605 Fæhn Follestad, A., Herlingshaw, K., Ghadjari, H., Knudsen, D. J., McWilliams,  
606 K. A., Moen, J. I., ... Oksavik, K. (2020, June). Dayside Field-Aligned  
607 Current Impacts on Ionospheric Irregularities. *Geophys. Res. Lett.*, 47(11),  
608 e86722. doi: 10.1029/2019GL086722
- 609 Fang, X., Randall, C. E., Lummerzheim, D., Wang, W., Lu, G., Solomon, S. C.,  
610 & Frahm, R. A. (2010, November). Parameterization of monoenergetic  
611 electron impact ionization. *Geophys. Res. Lett.*, 37(22), L22106. doi:  
612 10.1029/2010GL045406
- 613 Gondarenko, N. A., & Guzdar, P. N. (2004, September). Plasma patch structuring  
614 by the nonlinear evolution of the gradient drift instability in the high-latitude  
615 ionosphere. *Journal of Geophysical Research (Space Physics)*, 109(A9),  
616 A09301. doi: 10.1029/2004JA010504
- 617 Hapgood, M., Liu, H., & Lugaz, N. (2022, March). SpaceX—Sailing Close  
618 to the Space Weather? *Space Weather*, 20(3), e2022SW003074. doi:  
619 10.1029/2022SW00307410.1002/essoar.10510636.1
- 620 Hartinger, M. D., Elsdén, T., Archer, M. O., Takahashi, K., Wright, A. N., Arte-

- 621 myev, A., ... Angelopoulos, V. (2023, December). Properties of Magne-  
 622 tohydrodynamic Normal Modes in the Earth's Magnetosphere. *Journal*  
 623 *of Geophysical Research (Space Physics)*, 128(12), e2023JA031987. doi:  
 624 10.1029/2023JA031987
- 625 Hartinger, M. D., Moldwin, M. B., Zou, S., Bonnell, J. W., & Angelopoulos, V.  
 626 (2015, January). ULF wave electromagnetic energy flux into the ionosphere:  
 627 Joule heating implications. *Journal of Geophysical Research (Space Physics)*,  
 628 120(1), 494-510. doi: 10.1002/2014JA020129
- 629 Hartinger, M. D., Takahashi, K., Drozdov, A. Y., Shi, X., Usanova, M. E., & Kress,  
 630 B. (2022, April). ULF Wave Modeling, Effects, and Applications: Accom-  
 631 plishments, Recent Advances, and Future. *Frontiers in Astronomy and Space*  
 632 *Sciences*, 9, 867394. doi: 10.3389/fspas.2022.867394
- 633 Hartley, D. P., Kletzing, C. A., Kurth, W. S., Bounds, S. R., Averkamp, T. F.,  
 634 Hospodarsky, G. B., ... Watt, C. E. J. (2016, May). Using the cold plasma  
 635 dispersion relation and whistler mode waves to quantify the antenna sheath  
 636 impedance of the Van Allen Probes EFW instrument. *Journal of Geophysical*  
 637 *Research (Space Physics)*, 121(5), 4590-4606. doi: 10.1002/2016JA022501
- 638 Heelis, R. A., Sojka, J. J., David, M., & Schunk, R. W. (2009, March). Storm  
 639 time density enhancements in the middle-latitude dayside ionosphere.  
 640 *Journal of Geophysical Research (Space Physics)*, 114(A3), A03315. doi:  
 641 10.1029/2008JA013690
- 642 Hey, J. S., Parsons, S. J., & Phillips, J. W. (1946, August). Fluctuations in Cos-  
 643 mic Radiation at Radio-Frequencies. *Nature*, 158(4007), 234. doi: 10.1038/  
 644 158234a0
- 645 Huang, C.-L., Spence, H. E., Singer, H. J., & Tsyganenko, N. A. (2008, April).  
 646 A quantitative assessment of empirical magnetic field models at geosyn-  
 647 chronous orbit during magnetic storms. *Journal of Geophysical Research*  
 648 *(Space Physics)*, 113(A4), A04208. doi: 10.1029/2007JA012623
- 649 Huang, C.-S., & Kelley, M. C. (1996, January). Nonlinear evolution of equatorial  
 650 spread F. 2. Gravity wave seeding of Rayleigh-Taylor instability. *J. Geophys.*  
 651 *Res.*, 101(A1), 293-302. doi: 10.1029/95JA02210
- 652 Huba, J. D., & Drob, D. (2017, June). SAMI3 prediction of the impact of the 21  
 653 August 2017 total solar eclipse on the ionosphere/plasmasphere system. *Geo-*

- 654 *phys. Res. Lett.*, *44*(12), 5928-5935. doi: 10.1002/2017GL073549
- 655 Hudson, M., Denton, R., Lessard, M., Miftakhova, E., & Anderson, R. (2004, Jan-  
656 uary). A study of Pc-5 ULF oscillations. *Annales Geophysicae*, *22*(1), 289-302.  
657 doi: 10.5194/angeo-22-289-2004
- 658 Hudson, M. K., Elkington, S. R., Lyon, J. G., & Goodrich, C. C. (2000, Jan-  
659 uary). Increase in Relativistic Electron Flux in the Inner Magnetosphere:  
660 ULF Wave Mode Structure. *Advances in Space Research*, *25*(12), 2327-2337.  
661 doi: 10.1016/S0273-1177(99)00518-9
- 662 Hudson, M. K., Kress, B. T., Mueller, H.-R., Zastrow, J. A., & Bernard Blake, J.  
663 (2008, March). Relationship of the Van Allen radiation belts to solar wind  
664 drivers. *Journal of Atmospheric and Solar-Terrestrial Physics*, *70*, 708-729.  
665 doi: 10.1016/j.jastp.2007.11.003
- 666 Hughes, W. J., & Southwood, D. J. (1976, July). The screening of micropulsation  
667 signals by the atmosphere and ionosphere. *J. Geophys. Res.*, *81*(19), 3234.  
668 doi: 10.1029/JA081i019p03234
- 669 Hunsucker, R. D. (1982, May). Atmospheric Gravity Waves Generated in the High-  
670 Latitude Ionosphere: A Review (Paper 1R1822). *Reviews of Geophysics and*  
671 *Space Physics*, *20*, 293. doi: 10.1029/RG020i002p00293
- 672 Jacobs, J. A., Kato, Y., Matsushita, S., & Troitskaya, V. A. (1964, January). Classi-  
673 fication of Geomagnetic Micropulsations. *J. Geophys. Res.*, *69*, 180-181. doi:  
674 10.1029/JZ069i001p00180
- 675 Jakowski, N., Mayer, C., Hoque, M., & Wilken, V. (2011). Total electron content  
676 models and their use in ionosphere monitoring. *Radio Science*, *46*(06), 1-11.
- 677 Jakowski, N., Sardon, E., Engler, E., Jungstand, A., & Klähn, D. (1996, De-  
678 cember). Relationships between GPS-signal propagation errors and  
679 EISCAT observations. *Annales Geophysicae*, *14*(12), 1429-1436. doi:  
680 10.1007/s00585-996-1429-0
- 681 Jaynes, A. N., Lessard, M. R., Takahashi, K., Ali, A. F., Malaspina, D. M., Michell,  
682 R. G., ... Wygant, J. R. (2015, October). Correlated Pc4-5 ULF waves,  
683 whistler-mode chorus, and pulsating aurora observed by the Van Allen  
684 Probes and ground-based systems. *J. Geophys. Res.*, *120*, 8749-8761. doi:  
685 10.1002/2015JA021380
- 686 Jin, Y., Moen, J. I., & Miloch, W. J. (2015). On the collocation of the cusp au-

- 687 rora and the GPS phase scintillation: A statistical study. *Journal of Geophysical*  
 688 *Research: Space Physics*, 120(10), 9176–9191.
- 689 Jin, Y., Xiong, C., Clausen, L., Spicher, A., Kotova, D., Brask, S., . . . Miloch, W.  
 690 (2020, July). Ionospheric Plasma Irregularities Based on In Situ Measurements  
 691 From the Swarm Satellites. *Journal of Geophysical Research (Space Physics)*,  
 692 125(7), e28103. doi: 10.1029/2020JA028103
- 693 Kaeppeler, S. R., Marshall, R., Sanchez, E. R., Juarez Madera, D. H., Troyer, R., &  
 694 Jaynes, A. N. (2022, December). pyGPI5: A python D- and E-region chem-  
 695 istry and ionization model. *Frontiers in Astronomy and Space Sciences*, 9,  
 696 338. doi: 10.3389/fspas.2022.1028042
- 697 Katoh, Y., Rosendahl, P. S., Ogawa, Y., Hiraki, Y., & Tadokoro, H. (2023, Decem-  
 698 ber). Effect of the mirror force on the collision rate due to energetic electron  
 699 precipitation: Monte Carlo simulations. *Earth, Planets and Space*, 75(1), 117.  
 700 doi: 10.1186/s40623-023-01871-y
- 701 Kelley, M. C. (2009). *The Earth’s ionosphere: Plasma physics and electrodynamics*.  
 702 Academic press.
- 703 Kennel, C. F., & Engelmann, F. (1966, November). Velocity Space Diffusion from  
 704 Weak Plasma Turbulence in a Magnetic Field. *Physics of Fluids*, 9, 2377-2388.  
 705 doi: 10.1063/1.1761629
- 706 Kennel, C. F., & Petschek, H. E. (1966, January). Limit on Stably Trapped Particle  
 707 Fluxes. *J. Geophys. Res.*, 71, 1-28.
- 708 Keskinen, M. J., & Ossakow, S. L. (1983, January). Nonlinear evolution of convect-  
 709 ing plasma enhancements in the auroral ionosphere, 2. Small scale irregulari-  
 710 ties. *J. Geophys. Res.*, 88(A1), 474-482. doi: 10.1029/JA088iA01p00474
- 711 Kintner, P. M., Ledvina, B. M., & de Paula, E. R. (2007, September). GPS  
 712 and ionospheric scintillations. *Space Weather*, 5(9), 09003. doi: 10.1029/  
 713 2006SW000260
- 714 Komjathy, A. (1997). *Global ionospheric total electron content mapping using the*  
 715 *global positioning system* (Unpublished doctoral dissertation). University of  
 716 New Brunswick, Canada.
- 717 Komjathy, A., Sparks, L., Wilson, B. D., & Mannucci, A. J. (2005, December).  
 718 Automated daily processing of more than 1000 ground-based GPS receivers  
 719 for studying intense ionospheric storms. *Radio Science*, 40(6), RS6006. doi:

- 720 10.1029/2005RS003279
- 721 Komjathy, A., Yang, Y.-M., Meng, X., Verkhoglyadova, O., Mannucci, A. J.,  
722 & Langley, R. B. (2016, July). Review and perspectives: Understand-  
723 ing natural-hazards-generated ionospheric perturbations using GPS mea-  
724 surements and coupled modeling. *Radio Science*, *51*(7), 951-961. doi:  
725 10.1002/2015RS005910
- 726 Le Contel, O., Roux, A., Robert, P., Coillot, C., Bouabdellah, A., de La Porte,  
727 B., ... Larson, D. (2008, December). First Results of the THEMIS  
728 Search Coil Magnetometers. *Space Sci. Rev.*, *141*, 509-534. doi: 10.1007/  
729 s11214-008-9371-y
- 730 Lessard, M. R., & Knudsen, D. J. (2001, October). Ionospheric reflection of small-  
731 scale Alfvén waves. *Geophys. Res. Lett.*, *28*(18), 3573-3576. doi: 10.1029/  
732 2000GL012529
- 733 Li, L., Omura, Y., Zhou, X.-Z., Zong, Q.-G., Rankin, R., Yue, C., & Fu, S.-  
734 Y. (2022, May). Nonlinear Wave Growth Analysis of Chorus Emissions  
735 Modulated by ULF Waves. *Geophys. Res. Lett.*, *49*(10), e97978. doi:  
736 10.1029/2022GL097978
- 737 Li, L., Omura, Y., Zhou, X.-Z., Zong, Q.-G., Rankin, R., Yue, C., ... Ren, J. (2023,  
738 February). Chorus Wave Generation Modulated by Field Line Resonance and  
739 Mirror-Mode ULF Waves. *Journal of Geophysical Research (Space Physics)*,  
740 *128*(2), e2022JA031127. doi: 10.1029/2022JA031127
- 741 Li, W., Bortnik, J., Thorne, R. M., & Angelopoulos, V. (2011, December). Global  
742 distribution of wave amplitudes and wave normal angles of chorus waves  
743 using THEMIS wave observations. *J. Geophys. Res.*, *116*, 12205. doi:  
744 10.1029/2011JA017035
- 745 Li, W., Bortnik, J., Thorne, R. M., Nishimura, Y., Angelopoulos, V., & Chen, L.  
746 (2011, June). Modulation of whistler mode chorus waves: 2. Role of density  
747 variations. *J. Geophys. Res.*, *116*, A06206. doi: 10.1029/2010JA016313
- 748 Li, W., Thorne, R. M., Bortnik, J., Nishimura, Y., & Angelopoulos, V. (2011, June).  
749 Modulation of whistler mode chorus waves: 1. Role of compressional Pc4-5  
750 pulsations. *J. Geophys. Res.*, *116*, A06205. doi: 10.1029/2010JA016312
- 751 Lyons, L. R. (1974, December). Pitch angle and energy diffusion coefficients from  
752 resonant interactions with ion-cyclotron and whistler waves. *Journal of Plasma*

- 753            *Physics*, 12, 417-432. doi: 10.1017/S002237780002537X
- 754    Lysak, R. L. (1991, February). Feedback instability of the ionospheric resonant cav-  
755            ity. *J. Geophys. Res.*, 96(A2), 1553-1568. doi: 10.1029/90JA02154
- 756    Ma, Q., Connor, H. K., Zhang, X. J., Li, W., Shen, X. C., Gillespie, D., ... Spence,  
757            H. E. (2020, August). Global Survey of Plasma Sheet Electron Precipitation  
758            due to Whistler Mode Chorus Waves in Earth's Magnetosphere. *Geophys.*  
759            *Res. Lett.*, 47(15), e88798. doi: 10.1029/2020GL088798
- 760    Makarevich, R. A., Crowley, G., Azeem, I., Ngwira, C., & Forsythe, V. V. (2021,  
761            May). Auroral E Region as a Source Region for Ionospheric Scintillation.  
762            *Journal of Geophysical Research (Space Physics)*, 126(5), e29212. doi:  
763            10.1029/2021JA029212
- 764    Mannucci, A. J., Wilson, B. D., Yuan, D. N., Ho, C. H., Lindqwister, U. J., &  
765            Runge, T. F. (1998, May). A global mapping technique for GPS-derived  
766            ionospheric total electron content measurements. *Radio Science*, 33(3), 565-  
767            582. doi: 10.1029/97RS02707
- 768    Maruyama, T., Ma, G., & Nakamura, M. (2004, October). Signature of TEC storm  
769            on 6 November 2001 derived from dense GPS receiver network and ionosonde  
770            chain over Japan. *Journal of Geophysical Research (Space Physics)*, 109(A10),  
771            A10302. doi: 10.1029/2004JA010451
- 772    McCaffrey, A. M., & Jayachandran, P. T. (2017, June). Observation of subsecond  
773            variations in auroral region total electron content using 100 Hz sampling of  
774            GPS observables. *Journal of Geophysical Research (Space Physics)*, 122(6),  
775            6892-6900. doi: 10.1002/2017JA024255
- 776    McCaffrey, A. M., & Jayachandran, P. T. (2019, February). Determination of the  
777            Refractive Contribution to GPS Phase "Scintillation". *Journal of Geophysical*  
778            *Research (Space Physics)*, 124(2), 1454-1469. doi: 10.1029/2018JA025759
- 779    McFadden, J. P., Carlson, C. W., Larson, D., Ludlam, M., Abiad, R., Elliott, B.,  
780            ... Angelopoulos, V. (2008, December). The THEMIS ESA Plasma In-  
781            strument and In-flight Calibration. *Space Sci. Rev.*, 141, 277-302. doi:  
782            10.1007/s11214-008-9440-2
- 783    McPherron, R. L. (1972, September). Substorm related changes in the geomagnetic  
784            tail: The growth phase. *Planetary Space Science*, 20, 1521-1539. doi: 10.1016/  
785            0032-0633(72)90054-2

- 786 Meng, X., Mannucci, A. J., Verkhoglyadova, O. P., & Tsurutani, B. T. (2016, April).  
 787 On forecasting ionospheric total electron content responses to high-speed solar  
 788 wind streams. *Journal of Space Weather and Space Climate*, *6*, A19. doi:  
 789 10.1051/swsc/2016014
- 790 Meng, X., Mannucci, A. J., Verkhoglyadova, O. P., Tsurutani, B. T., Ridley, A. J.,  
 791 & Shim, J.-S. (2020, February). Thermosphere-Ionosphere Modeling With  
 792 Forecastable Inputs: Case Study of the June 2012 High-Speed Stream Geo-  
 793 magnetic Storm. *Space Weather*, *18*(2), e02352. doi: 10.1029/2019SW002352
- 794 Meng, X., Ozturk, D. S., Verkhoglyadova, O. P., Varney, R. H., Reimer, A. S., Seme-  
 795 ter, J. L., ... Zhan, W. (2022, December). Energy Deposition by Mesoscale  
 796 High-Latitude Electric Fields Into the Thermosphere During the 26 October  
 797 2019 Geomagnetic Storm. *Journal of Geophysical Research (Space Physics)*,  
 798 *127*(12), e2022JA030716. doi: 10.1029/2022JA030716
- 799 Meredith, N. P., Bortnik, J., Horne, R. B., Li, W., & Shen, X.-C. (2021). Statisti-  
 800 cal investigation of the frequency dependence of the chorus source mechanism  
 801 of plasmaspheric hiss. *Geophysical Research Letters*, *48*(6), e2021GL092725.  
 802 Retrieved from [https://agupubs.onlinelibrary.wiley.com/doi/abs/](https://agupubs.onlinelibrary.wiley.com/doi/abs/10.1029/2021GL092725)  
 803 [10.1029/2021GL092725](https://doi.org/10.1029/2021GL092725) (e2021GL092725 2021GL092725) doi: [https://](https://doi.org/10.1029/2021GL092725)  
 804 [doi.org/10.1029/2021GL092725](https://doi.org/10.1029/2021GL092725)
- 805 Miyoshi, Y., Katoh, Y., Nishiyama, T., Sakanoi, T., Asamura, K., & Hirahara, M.  
 806 (2010, October). Time of flight analysis of pulsating aurora electrons, consid-  
 807 ering wave-particle interactions with propagating whistler mode waves. *J.*  
 808 *Geophys. Res.*, *115*, A10312. doi: 10.1029/2009JA015127
- 809 Moen, J., Oksavik, K., Alfonsi, L., Daabakk, Y., Romano, V., & Spogli, L. (2013,  
 810 January). Space weather challenges of the polar cap ionosphere. *Journal of*  
 811 *Space Weather and Space Climate*, *3*, A02. doi: 10.1051/swsc/2013025
- 812 Morton, Y. J., Yang, Z., Breitsch, B., Bourne, H., & Rino, C. (2020). Ionospheric ef-  
 813 fects, monitoring, and mitigation techniques. In *Position, navigation, and tim-*  
 814 *ing technologies in the 21st century* (p. 879-937). John Wiley Sons, Ltd. doi:  
 815 <https://doi.org/10.1002/9781119458449.ch31>
- 816 Newell, P. T., Sotirelis, T., & Wing, S. (2009, September). Diffuse, monoenergetic,  
 817 and broadband aurora: The global precipitation budget. *J. Geophys. Res.*,  
 818 *114*, A09207. doi: 10.1029/2009JA014326

- 819 Nishimura, Y., Bortnik, J., Li, W., Thorne, R. M., Lyons, L. R., Angelopoulos, V.,  
 820 ... Auster, U. (2010, October). Identifying the Driver of Pulsating Aurora.  
 821 *Science*, *330*, 81-84. doi: 10.1126/science.1193186
- 822 Nishimura, Y., Bortnik, J., Li, W., Thorne, R. M., Ni, B., Lyons, L. R., ... Auster,  
 823 U. (2013, Feb). Structures of dayside whistler-mode waves deduced from  
 824 conjugate diffuse aurora. *Journal of Geophysical Research (Space Physics)*,  
 825 *118*(2), 664-673. doi: 10.1029/2012JA018242
- 826 Nishimura, Y., Kelly, T., Jayachandran, P. T., Mrak, S., Semeter, J. L., Dono-  
 827 van, E. F., ... Nishitani, N. (2023, August). Nightside High-Latitude  
 828 Phase and Amplitude Scintillation During a Substorm Using 1-Second Scin-  
 829 tillation Indices. *Journal of Geophysical Research (Space Physics)*, *128*(8),  
 830 e2023JA031402. doi: 10.1029/2023JA031402
- 831 Nishimura, Y., Mrak, S., Semeter, J. L., Coster, A. J., Jayachandran, P. T., Groves,  
 832 K. M., ... Ruohoniemi, J. M. (2021, June). Evolution of Mid-latitude Density  
 833 Irregularities and Scintillation in North America During the 7-8 September  
 834 2017 Storm. *Journal of Geophysical Research (Space Physics)*, *126*(6), e29192.  
 835 doi: 10.1029/2021JA029192
- 836 Okuzawa, T., & Davies, K. (1981, March). Pulsations in total columnar elec-  
 837 tron content. *J. Geophys. Res.*, *86*(A3), 1355-1364. doi: 10.1029/  
 838 JA086iA03p01355
- 839 Pi, X., Mannucci, A. J., Lindqwister, U. J., & Ho, C. M. (1997, September). Mon-  
 840 itoring of global ionospheric irregularities using the Worldwide GPS Network.  
 841 *Geophys. Res. Lett.*, *24*(18), 2283-2286. doi: 10.1029/97GL02273
- 842 Picone, J. M., Hedin, A. E., Drob, D. P., & Aikin, A. C. (2002, December).  
 843 NRLMSISE-00 empirical model of the atmosphere: Statistical comparisons and  
 844 scientific issues. *Journal of Geophysical Research (Space Physics)*, *107*(A12),  
 845 1468. doi: 10.1029/2002JA009430
- 846 Pilipenko, V., Belakhovsky, V., Murr, D., Fedorov, E., & Engebretson, M. (2014,  
 847 June). Modulation of total electron content by ULF Pc5 waves. *Jour-  
 848 nal of Geophysical Research (Space Physics)*, *119*(6), 4358-4369. doi:  
 849 10.1002/2013JA019594
- 850 Poole, A. W. V., & Sutcliffe, P. R. (1987, March). Mechanisms for observed total  
 851 electron content pulsations at midlatitudes. *Journal of Atmospheric and Ter-*



- 852 *restrial Physics*, *49*, 231-236. doi: 10.1016/0021-9169(87)90058-4
- 853 Prikryl, P., Jayachandran, P. T., Chadwick, R., & Kelly, T. D. (2015, May).  
 854 Climatology of GPS phase scintillation at northern high latitudes for the  
 855 period from 2008 to 2013. *Annales Geophysicae*, *33*(5), 531-545. doi:  
 856 10.5194/angeo-33-531-2015
- 857 Pulkkinen, A., Bernabeu, E., Thomson, A., Viljanen, A., Pirjola, R., Boteler, D.,  
 858 ... MacAlester, M. (2017, Jul). Geomagnetically induced currents: Science,  
 859 engineering, and applications readiness. *Space Weather*, *15*(7), 828-856. doi:  
 860 10.1002/2016SW001501
- 861 Rideout, W., & Coster, A. (2006, May). Automated GPS processing for global to-  
 862 tal electron content data. *GPS Solutions*, *10*, 219-228. doi: 10.1007/s10291-006  
 863 -0029-5
- 864 Ridley, A. J., Deng, Y., & Tóth, G. (2006, May). The global ionosphere thermo-  
 865 sphere model. *Journal of Atmospheric and Solar-Terrestrial Physics*, *68*(8),  
 866 839-864. doi: 10.1016/j.jastp.2006.01.008
- 867 Rino, C. (2011). *The theory of scintillation with applications in remote sensing*.  
 868 John Wiley & Sons.
- 869 Sandhu, J. K., Rae, I. J., Staples, F. A., Hartley, D. P., Walach, M. T., Elsdén, T.,  
 870 & Murphy, K. R. (2021, July). The Roles of the Magnetopause and Plasma-  
 871 pause in Storm-Time ULF Wave Power Enhancements. *Journal of Geophysical*  
 872 *Research (Space Physics)*, *126*(7), e29337. doi: 10.1029/2021JA029337
- 873 Santolík, O., Gurnett, D. A., Pickett, J. S., Parrot, M., & Cornilleau-Wehrin, N.  
 874 (2003, July). Spatio-temporal structure of storm-time chorus. *J. Geophys.*  
 875 *Res.*, *108*, 1278. doi: 10.1029/2002JA009791
- 876 Schunk, R. W., Scherliess, L., Sojka, J. J., Thompson, D. C., Anderson, D. N.,  
 877 Codrescu, M., ... Howe, B. M. (2004, February). Global Assimilation of  
 878 Ionospheric Measurements (GAIM). *Radio Science*, *39*(1), RS1S02. doi:  
 879 10.1029/2002RS002794
- 880 Shen, Y., Chen, L., Zhang, X.-J., Artemyev, A., Angelopoulos, V., Cully, C. M., ...  
 881 Horne, R. B. (2021, December). Conjugate Observation of Magnetospheric  
 882 Chorus Propagating to the Ionosphere by Ducting. *Geophys. Res. Lett.*,  
 883 *48*(23), e95933. doi: 10.1029/2021GL095933
- 884 Sheng, C., Deng, Y., Zhang, S.-R., Nishimura, Y., & Lyons, L. R. (2020, Febru-

- 885 ary). Relative Contributions of Ion Convection and Particle Precipitation  
 886 to Exciting Large-Scale Traveling Atmospheric and Ionospheric Distur-  
 887 bances. *Journal of Geophysical Research (Space Physics)*, 125(2), e27342.  
 888 doi: 10.1029/2019JA027342
- 889 Shi, R., Li, W., Ma, Q., Green, A., Kletzing, C. A., Kurth, W. S., ... Reeves, G. D.  
 890 (2019, February). Properties of Whistler Mode Waves in Earth's Plasmas-  
 891 sphere and Plumes. *Journal of Geophysical Research (Space Physics)*, 124(2),  
 892 1035-1051. doi: 10.1029/2018JA026041
- 893 Shi, X., Baker, J. B. H., Ruohoniemi, J. M., Hartinger, M. D., Murphy, K. R., Ro-  
 894 driguez, J. V., ... Angelopoulos, V. (2018, October). Long-Lasting Poloidal  
 895 ULF Waves Observed by Multiple Satellites and High-Latitude SuperDARN  
 896 Radars. *Journal of Geophysical Research (Space Physics)*, 123(10), 8422-8438.  
 897 doi: 10.1029/2018JA026003
- 898 Shi, X., Zhang, X.-J., Artemyev, A., Angelopoulos, V., Hartinger, M. D., Tsai,  
 899 E., & Wilkins, C. (2022, December). On the Role of ULF Waves in the  
 900 Spatial and Temporal Periodicity of Energetic Electron Precipitation. *Jour-  
 901 nal of Geophysical Research (Space Physics)*, 127(12), e2022JA030932. doi:  
 902 10.1029/2022JA030932
- 903 Skone, S. (2009, February). Using GPS TEC measurements to detect geomagnetic  
 904 Pc 3 pulsations. *Radio Science*, 44(19), RS0A27. doi: 10.1029/2008RS004106
- 905 Southwood, D., & Hughes, W. (1983). Theory of hydromagnetic waves in the mag-  
 906 netosphere. *Space Science Reviews*, 35(4), 301-366.
- 907 Southwood, D. J., & Kivelson, M. G. (1981, Jul). Charged particle behavior in  
 908 low-frequency geomagnetic pulsations 1. Transverse waves. *J. Geophys. Res.*,  
 909 86(A7), 5643-5655. doi: 10.1029/JA086iA07p05643
- 910 Spicher, A., Cameron, T., Grono, E. M., Yakymenko, K. N., Buchert, S. C., Clausen,  
 911 L. B. N., ... Moen, J. I. (2015, January). Observation of polar cap patches  
 912 and calculation of gradient drift instability growth times: A Swarm case study.  
 913 *Geophys. Res. Lett.*, 42(2), 201-206. doi: 10.1002/2014GL062590
- 914 Spicher, A., Clausen, L. B. N., Miloch, W. J., Lofstad, V., Jin, Y., & Moen, J. I.  
 915 (2017, March). Interhemispheric study of polar cap patch occurrence based on  
 916 Swarm in situ data. *Journal of Geophysical Research (Space Physics)*, 122(3),  
 917 3837-3851. doi: 10.1002/2016JA023750

- 918 Spogli, L., Alfonsi, L., de Franceschi, G., Romano, V., Aquino, M. H. O., & Dodson,  
 919 A. (2009, September). Climatology of GPS ionospheric scintillations over high  
 920 and mid-latitude European regions. *Annales Geophysicae*, *27*(9), 3429-3437.  
 921 doi: 10.5194/angeo-27-3429-2009
- 922 Streltsov, A. V., & Lotko, W. (2008, May). Coupling between density struc-  
 923 tures, electromagnetic waves and ionospheric feedback in the auroral zone.  
 924 *Journal of Geophysical Research (Space Physics)*, *113*(A5), A05212. doi:  
 925 10.1029/2007JA012594
- 926 Takahashi, K., & Anderson, B. J. (1992, July). Distribution of ULF energy  
 927 ( $f \approx 80$  mHz) in the inner magnetosphere: A statistical analysis of AMPTE  
 928 CCE magnetic field data. *J. Geophys. Res.*, *97*(A7), 10751-10773. doi:  
 929 10.1029/92JA00328
- 930 Themens, D. R., Watson, C., Žagar, N., Vasylykevych, S., Elvidge, S., McCaffrey, A.,  
 931 ... Jayachandran, P. T. (2022, April). Global Propagation of Ionospheric Dis-  
 932 turbances Associated With the 2022 Tonga Volcanic Eruption. *Geophys. Res.*  
 933 *Lett.*, *49*(7), e98158. doi: 10.1029/2022GL09815810.1002/essoar.10510350.1
- 934 Tsurutani, B. T., & Smith, E. J. (1974, January). Postmidnight chorus: A substorm  
 935 phenomenon. *J. Geophys. Res.*, *79*, 118-127. doi: 10.1029/JA079i001p00118
- 936 Tsyganenko, N. A. (1995, April). Modeling the Earth's magnetospheric magnetic  
 937 field confined within a realistic magnetopause. *J. Geophys. Res.*, *100*, 5599-  
 938 5612. doi: 10.1029/94JA03193
- 939 Tyler, E., Breneman, A., Cattell, C., Wygant, J., Thaller, S., & Malaspina, D.  
 940 (2019, Mar). Statistical Occurrence and Distribution of High-Amplitude  
 941 Whistler Mode Waves in the Outer Radiation Belt. *Geophys. Res. Lett.*,  
 942 *46*(5), 2328-2336. doi: 10.1029/2019GL082292
- 943 Verkhoglyadova, O. (2024). *Dataset for the paper "Magnetospheric control of*  
 944 *ionospheric TEC perturbations via whistler-mode and ULF waves" paper*  
 945 *to be submitted to AGU Advances*. JPL Open Repository. Retrieved from  
 946 <https://doi.org/10.48577/jpl.LGI5JS> doi: 10.48577/jpl.LGI5JS
- 947 Verkhoglyadova, O., Meng, X., Mannucci, A. J., Shim, J. S., & McGranaghan,  
 948 R. (2020, September). Evaluation of Total Electron Content Prediction  
 949 Using Three Ionosphere-Thermosphere Models. *Space Weather*, *18*(9),  
 950 e2020SW002452. doi: 10.1029/2020SW002452

- 951 Wang, B., Nishimura, Y., Hartinger, M., Sivasdas, N., Lyons, L. L., Varney, R. H., &  
 952 Angelopoulos, V. (2020, August). Ionospheric Modulation by Storm Time Pc5  
 953 ULF Pulsations and the Structure Detected by PFISR-THEMIS Conjunction.  
 954 *Geophys. Res. Lett.*, *47*(16), e89060. doi: 10.1029/2020GL089060
- 955 Waters, C. L., & Cox, S. P. (2009, July). ULF wave effects on high frequency signal  
 956 propagation through the ionosphere. *Annales Geophysicae*, *27*(7), 2779-2788.  
 957 doi: 10.5194/angeo-27-2779-2009
- 958 Watson, C., Jayachandran, P. T., & MacDougall, J. W. (2016, May). Characteris-  
 959 tics of GPS TEC variations in the polar cap ionosphere. *Journal of Geophysi-  
 960 cal Research (Space Physics)*, *121*(5), 4748-4768. doi: 10.1002/2015JA022275
- 961 Watson, C., Jayachandran, P. T., Singer, H. J., Redmon, R. J., & Danskin, D.  
 962 (2015, September). Large-amplitude GPS TEC variations associated with  
 963 Pc5-6 magnetic field variations observed on the ground and at geosynchronous  
 964 orbit. *Journal of Geophysical Research (Space Physics)*, *120*(9), 7798-7821.  
 965 doi: 10.1002/2015JA021517
- 966 Watson, C., Jayachandran, P. T., Singer, H. J., Redmon, R. J., & Danskin, D.  
 967 (2016, February). GPS TEC response to Pc4 “giant pulsations”. *Jour-  
 968 nal of Geophysical Research (Space Physics)*, *121*(2), 1722-1735. doi:  
 969 10.1002/2015JA022253
- 970 Watt, C. E. J., Degeling, A. W., Rankin, R., Murphy, K. R., Rae, I. J., & Singer,  
 971 H. J. (2011, October). Ultralow-frequency modulation of whistler-mode wave  
 972 growth. *Journal of Geophysical Research (Space Physics)*, *116*(A10), A10209.  
 973 doi: 10.1029/2011JA016730
- 974 Xia, Z., Chen, L., Dai, L., Claudepierre, S. G., Chan, A. A., Soto-Chavez, A. R.,  
 975 & Reeves, G. D. (2016, September). Modulation of chorus intensity by ULF  
 976 waves deep in the inner magnetosphere. *Geophys. Res. Lett.*, *43*, 9444-9452.  
 977 doi: 10.1002/2016GL070280
- 978 Xia, Z., Chen, L., & Li, W. (2020, November). Statistical Study of Chorus Modula-  
 979 tions by Background Magnetic Field and Plasma Density. *Geophys. Res. Lett.*,  
 980 *47*(22), e89344. doi: 10.1029/2020GL089344
- 981 Xiong, C., Park, J., Lühr, H., Stolle, C., & Ma, S. Y. (2010, September). Compar-  
 982 ing plasma bubble occurrence rates at CHAMP and GRACE altitudes during  
 983 high and low solar activity. *Annales Geophysicae*, *28*(9), 1647-1658. doi:

- 984 10.5194/angeo-28-1647-2010
- 985 Yeh, K. C., & Liu, C. H. (1982, April). Radio wave scintillations in the ionosphere.  
986 *IEEE Proceedings*, 70, 324-360.
- 987 Yeoman, T. K., James, M., Mager, P. N., & Klimushkin, D. Y. (2012, June). Super-  
988 DARN observations of high-m ULF waves with curved phase fronts and their  
989 interpretation in terms of transverse resonator theory. *Journal of Geophysical*  
990 *Research (Space Physics)*, 117(A6), A06231. doi: 10.1029/2012JA017668
- 991 Yizengaw, E., Moldwin, M. B., Komjathy, A., & Mannucci, A. J. (2006, February).  
992 Unusual topside ionospheric density response to the November 2003 super-  
993 storm. *Journal of Geophysical Research (Space Physics)*, 111(A2), A02308.  
994 doi: 10.1029/2005JA011433
- 995 Yizengaw, E., Zesta, E., Moldwin, M. B., Magoun, M., Tripathi, N. K., Surus-  
996 savadee, C., & Bamba, Z. (2018, June). ULF Wave-Associated Density  
997 Irregularities and Scintillation at the Equator. *Geophys. Res. Lett.*, 45(11),  
998 5290-5298. doi: 10.1029/2018GL078163
- 999 Zettergren, M. D., & Snively, J. B. (2015, September). Ionospheric response  
1000 to infrasonic-acoustic waves generated by natural hazard events. *Jour-*  
1001 *nal of Geophysical Research (Space Physics)*, 120(9), 8002-8024. doi:  
1002 10.1002/2015JA021116
- 1003 Zhai, C., Shi, X., Wang, W., Hartinger, M. D., Yao, Y., Peng, W., . . . Baker,  
1004 J. B. H. (2021, July). Characterization of High-m ULF Wave Signa-  
1005 tures in GPS TEC Data. *Geophys. Res. Lett.*, 48(14), e94282. doi:  
1006 10.1029/2021GL094282
- 1007 Zhang, S.-R., Vierinen, J., Aa, E., Goncharenko, L. P., Erickson, P. J., Rideout,  
1008 W., . . . Spicher, A. (2022, March). 2022 Tonga Volcanic Eruption Induced  
1009 Global Propagation of Ionospheric Disturbances via Lamb Waves. *Frontiers in*  
1010 *Astronomy and Space Sciences*, 9, 871275. doi: 10.3389/fspas.2022.871275
- 1011 Zhang, X. J., Angelopoulos, V., Artemyev, A. V., Hartinger, M. D., & Bortnik, J.  
1012 (2020, October). Modulation of Whistler Waves by Ultra-Low-Frequency Per-  
1013 turbations: The Importance of Magnetopause Location. *Journal of Geophysical*  
1014 *Research (Space Physics)*, 125(10), e28334. doi: 10.1029/2020JA028334
- 1015 Zhang, X.-J., Chen, L., Artemyev, A. V., Angelopoulos, V., & Liu, X. (2019,  
1016 November). Periodic Excitation of Chorus and ECH Waves Modulated by

- 1017           Ultralow Frequency Compressions.       *Journal of Geophysical Research (Space*  
1018           *Physics)*, 124(11), 8535-8550. doi: 10.1029/2019JA027201
- 1019   Zong, Q., Rankin, R., & Zhou, X.       (2017, Dec).       The interaction of ultra-low-  
1020           frequency pc3-5 waves with charged particles in Earth's magnetosphere.   *Re-*  
1021           *views of Modern Plasma Physics*, 1(1), 10. doi: 10.1007/s41614-017-0011-4
- 1022   Zou, S., Ridley, A., Jia, X., Boyd, E., Nicolls, M., Coster, A., . . . Ruohoniemi, J. M.  
1023           (2017, February).   PFISR observation of intense ion upflow fluxes associated  
1024           with an SED during the 1 June 2013 geomagnetic storm.   *Journal of Geophysi-*  
1025           *cal Research (Space Physics)*, 122(2), 2589-2604. doi: 10.1002/2016JA023697

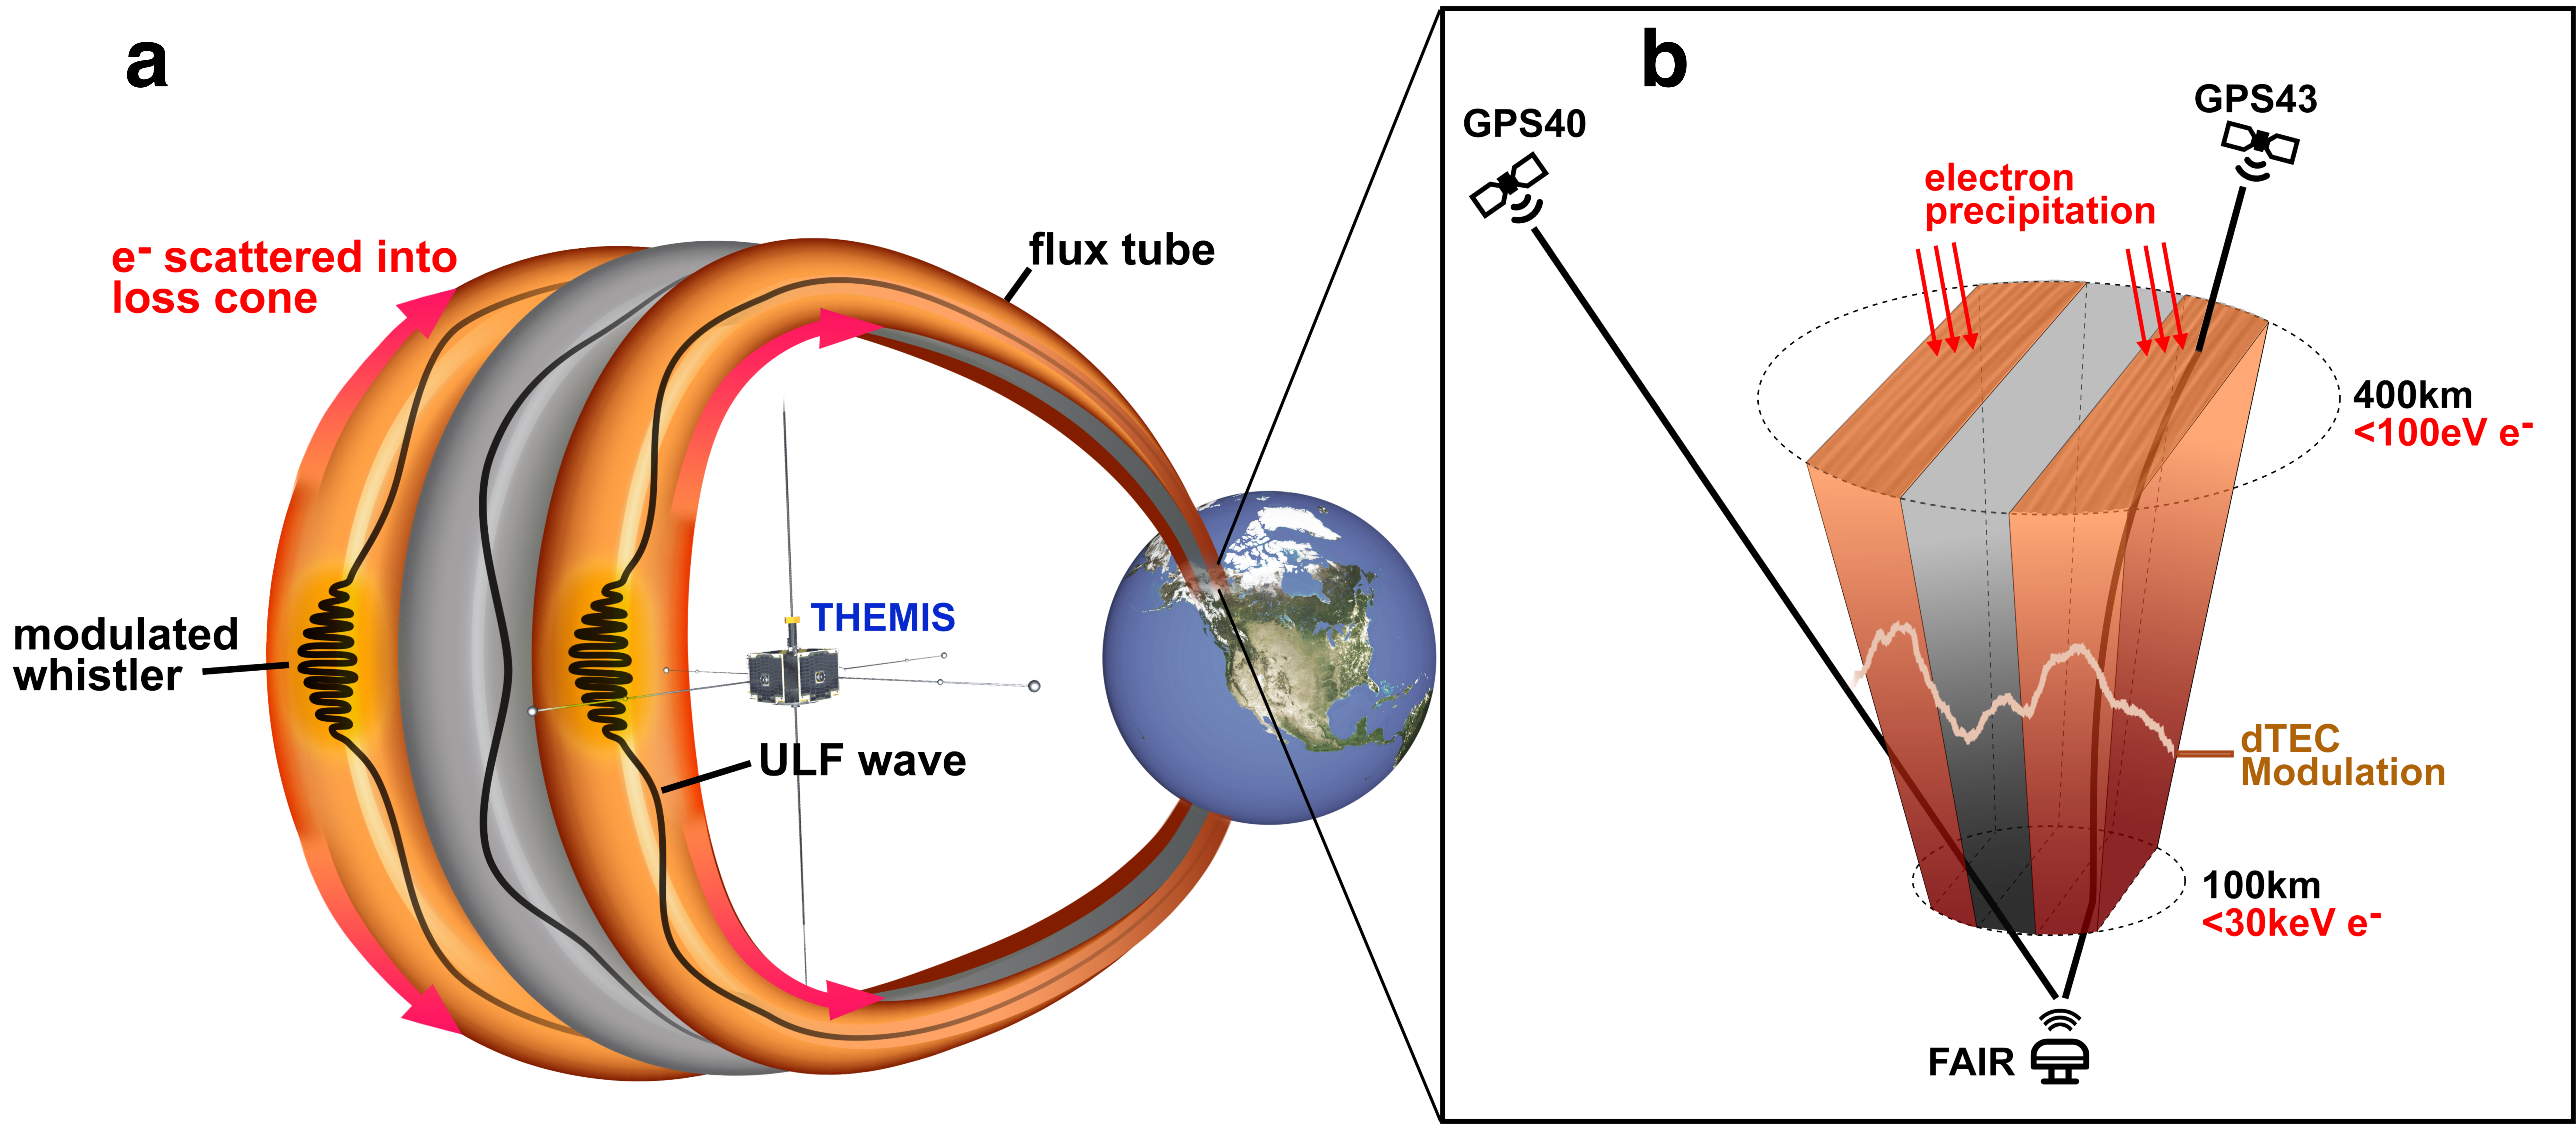

a

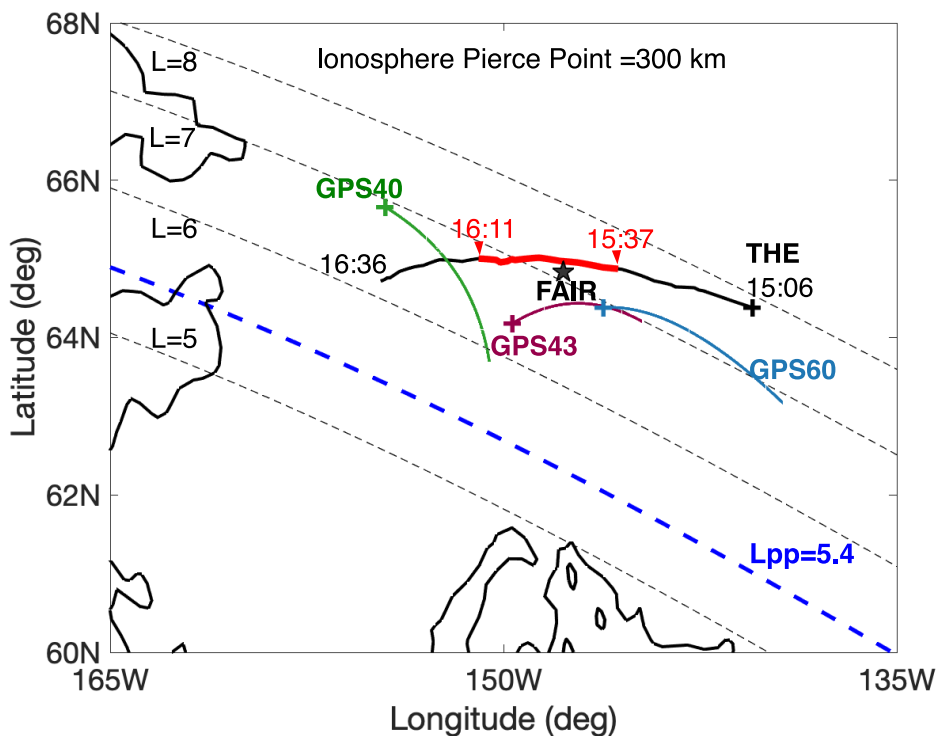

b

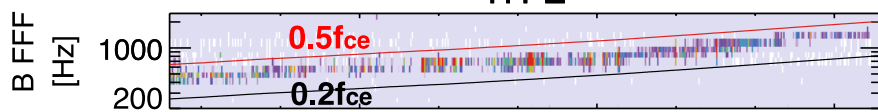

c

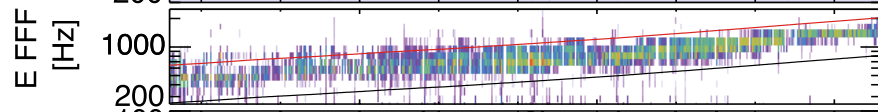

d

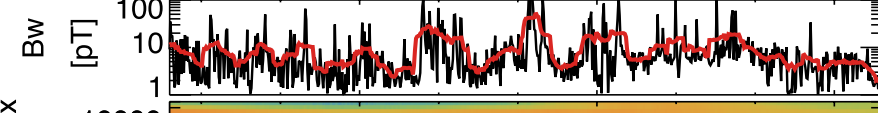

e

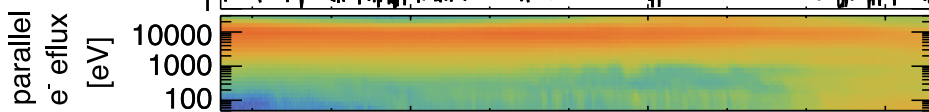

f

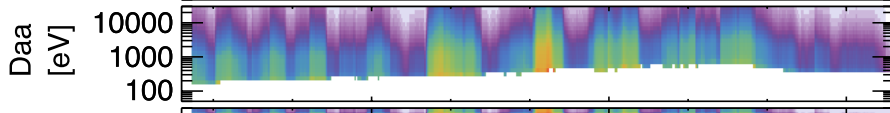

g

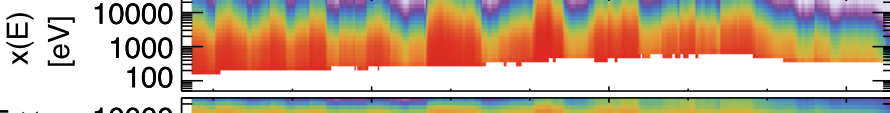

h

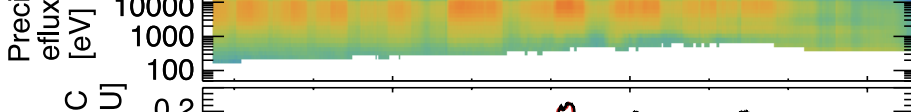

i

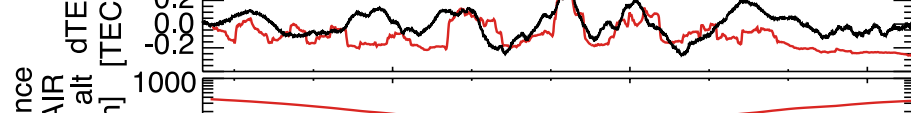

j

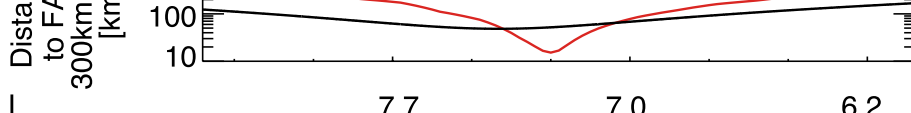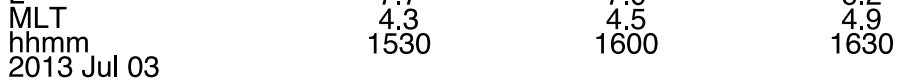



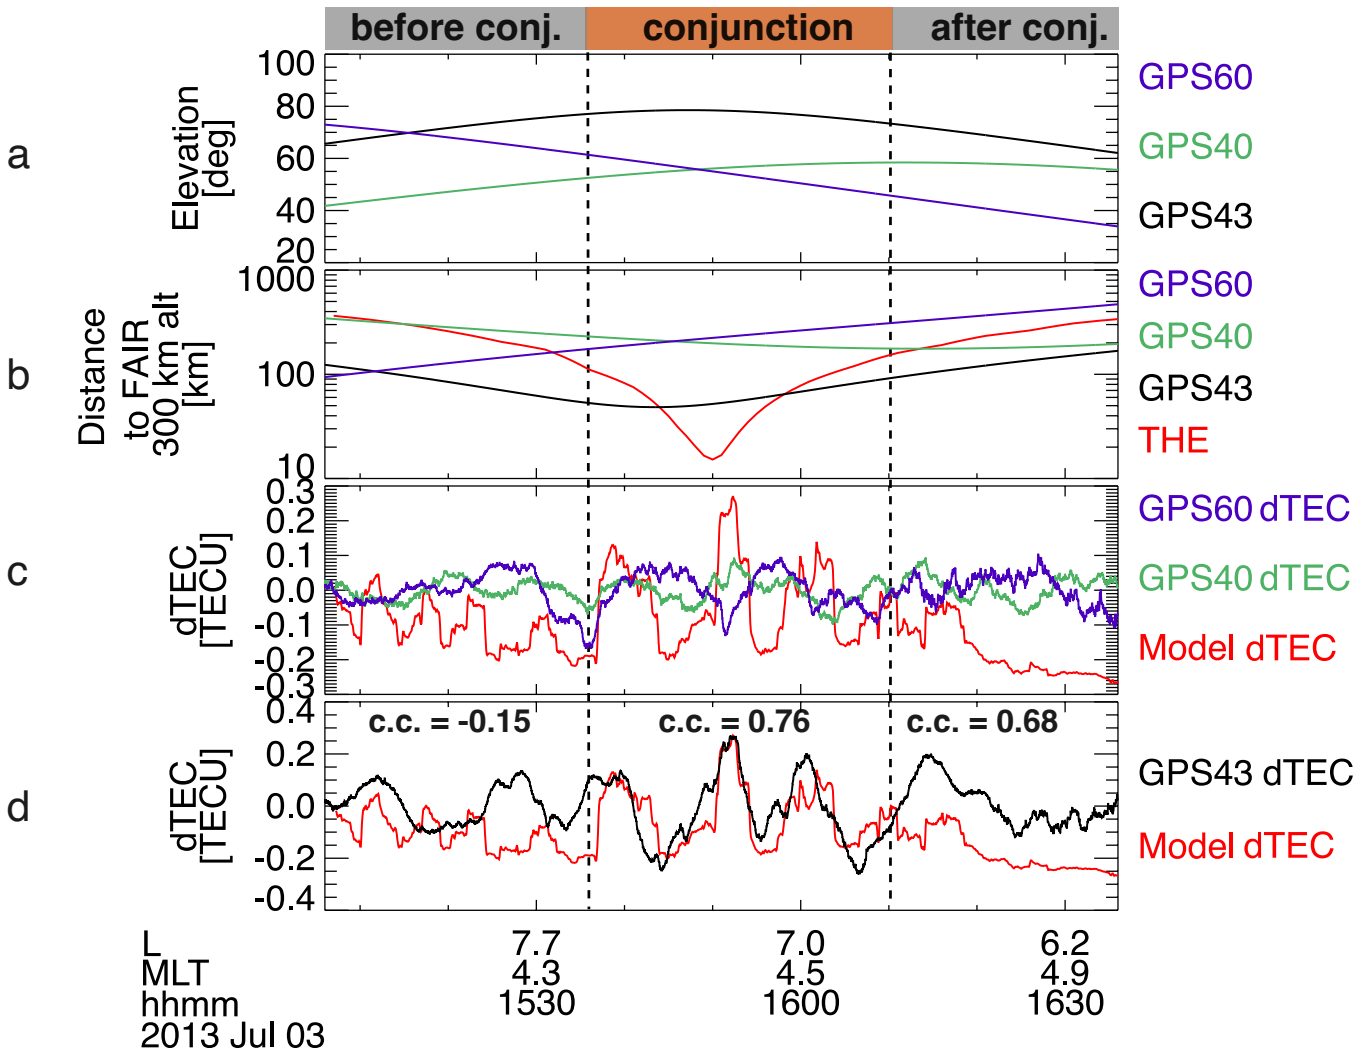

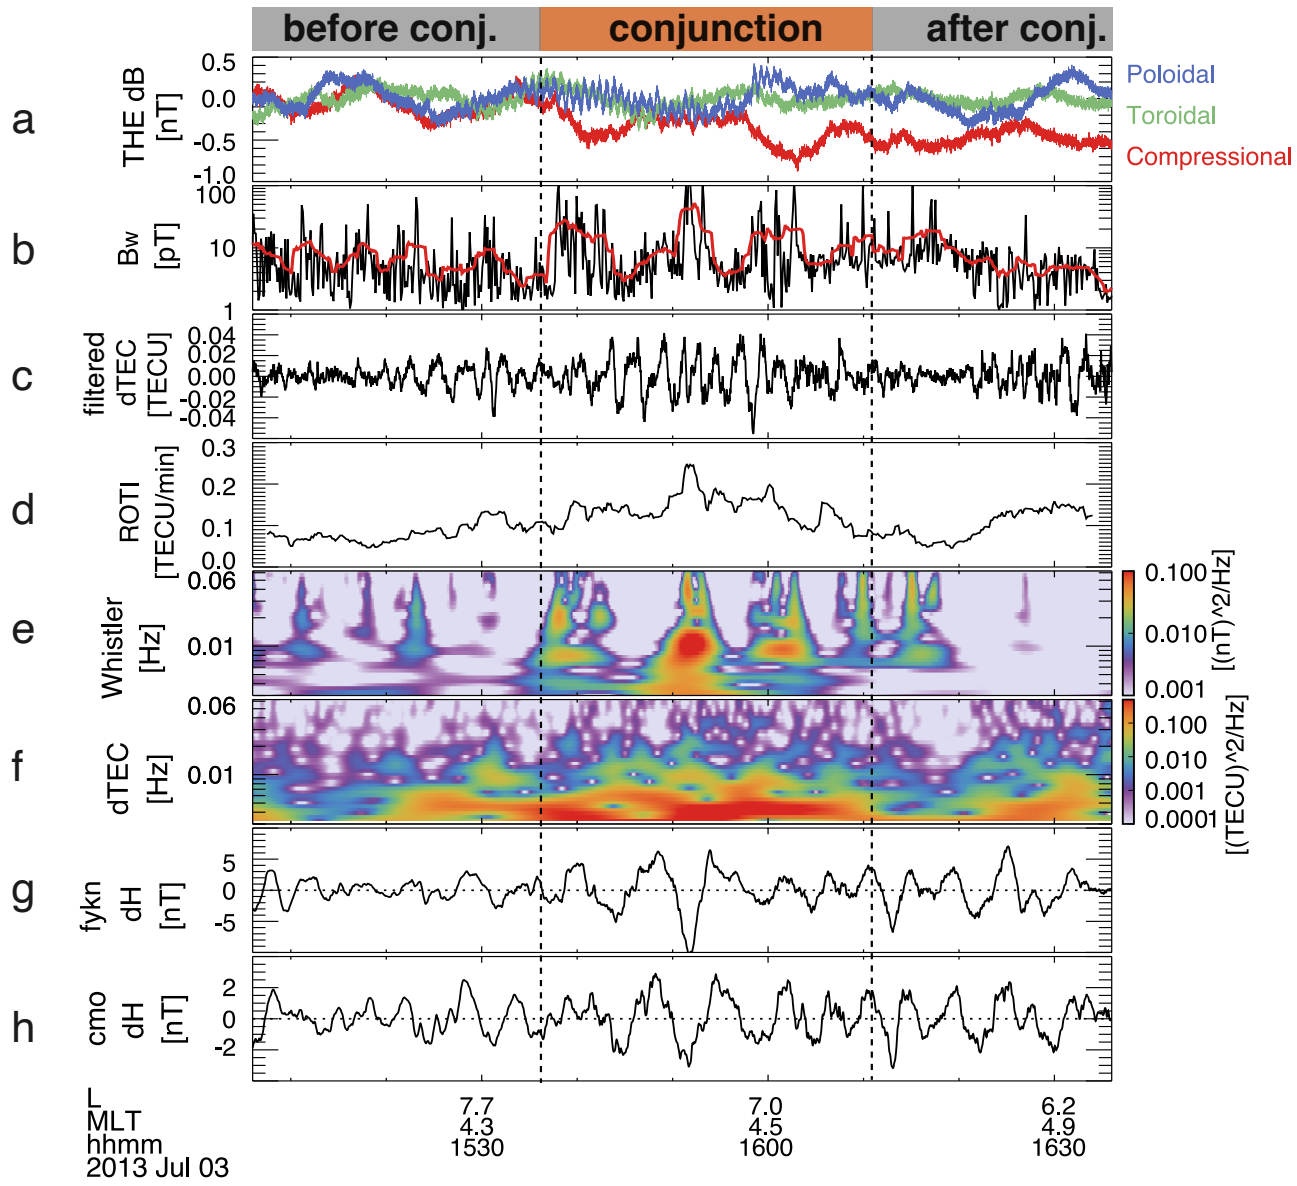

### Comparison of dTEC and Whistler spectra

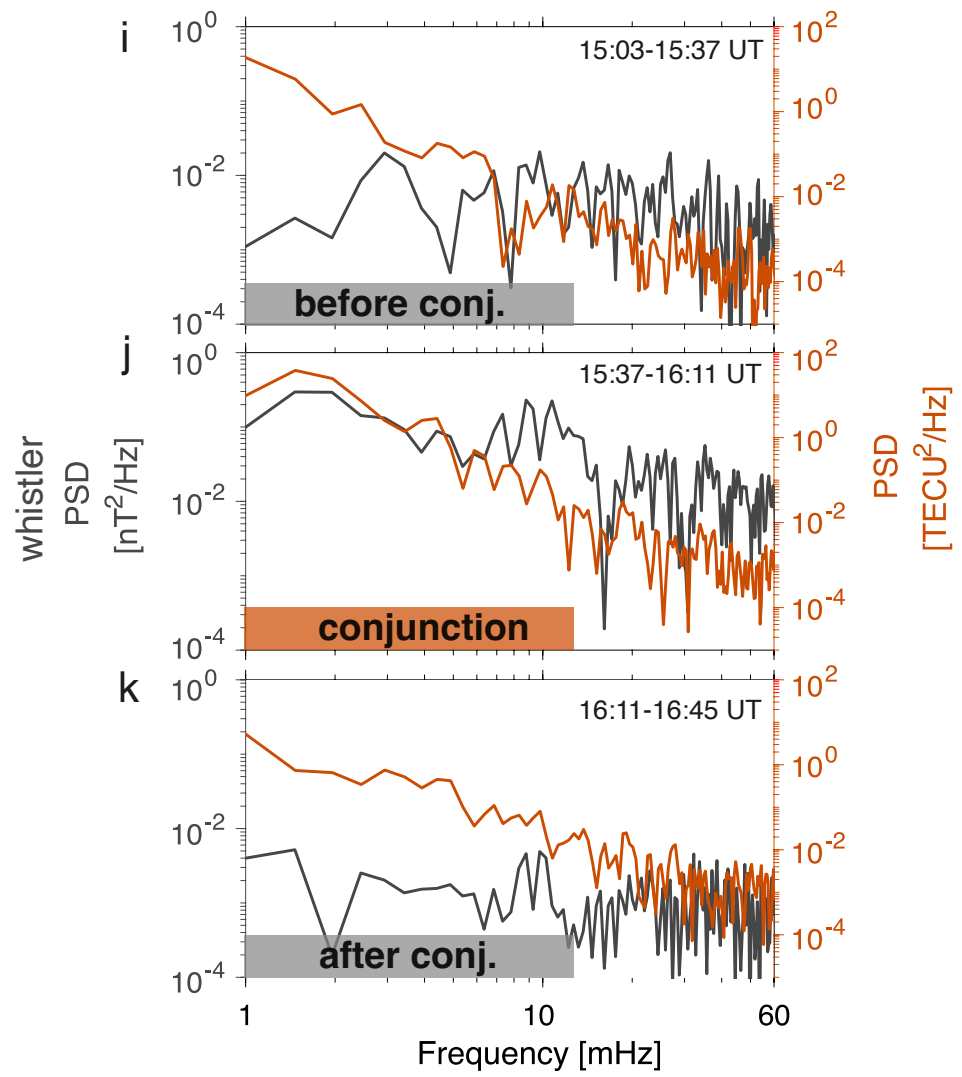

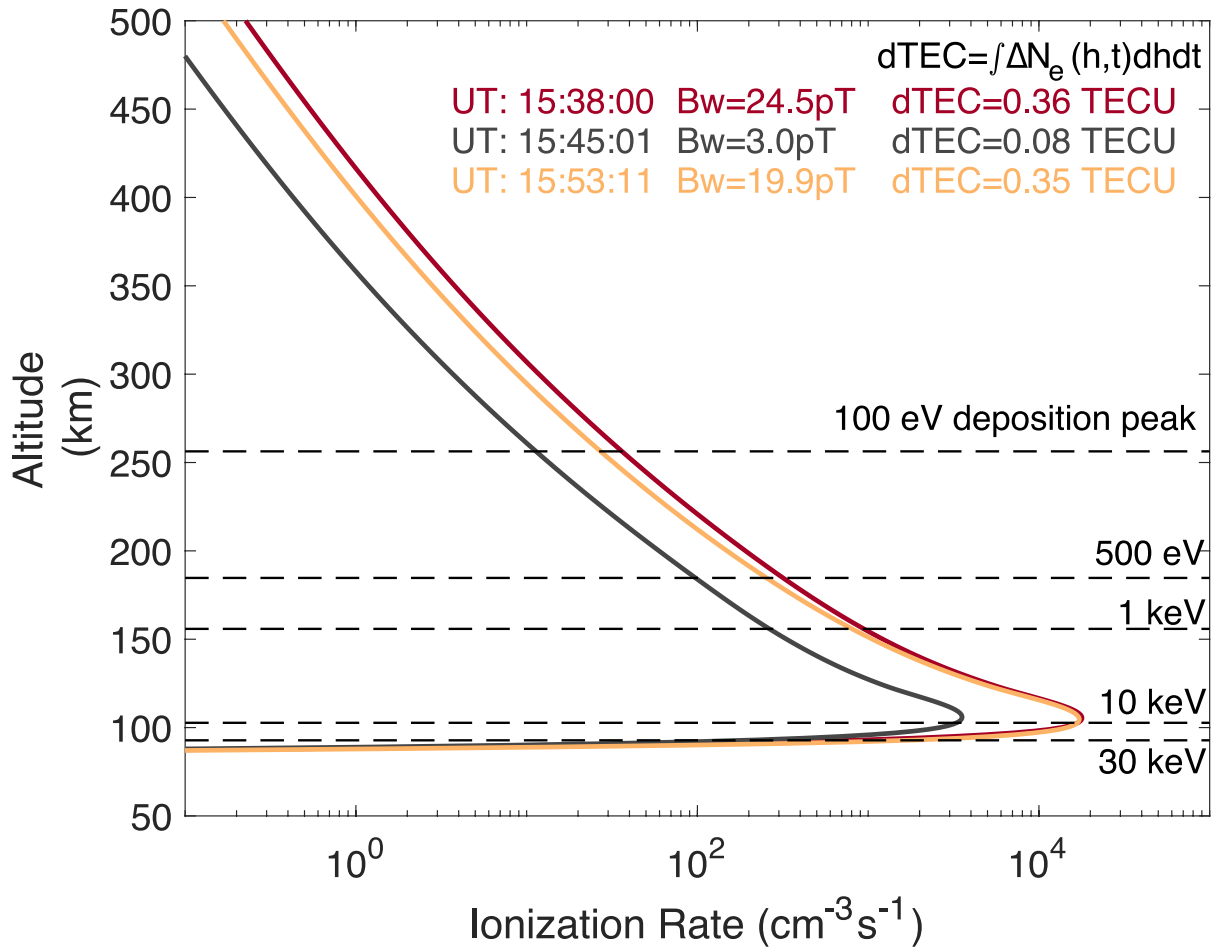

Supplement: AGA2-5-0-s003.pdf [file AGA2-5-0-s003.pdf]
