# Supplementary material for: Magnetospheric Control of Ionospheric TEC Perturbations via Whistler‐Mode and ULF Waves
Source: PubMed Central journal article supplement (PMC11600791; doi:10.1029/2024av001302), 2024-11-25

1                    **Magnetospheric control of ionospheric TEC**  
2                    **perturbations via whistler-mode and ULF waves**

3                    **Yangyang Shen<sup>1</sup>, Olga P. Verkhoglyadova<sup>2</sup>, Anton Artemyev<sup>1</sup>, Michael D.**  
4                    **Hartinger<sup>3,1</sup>, Vassilis Angelopoulos<sup>1</sup>, Xueling Shi<sup>4</sup>, Ying Zou<sup>5</sup>**

5                    <sup>1</sup>Department of Earth, Planetary, and Space Sciences, University of California, Los Angeles, CA, USA

6                    <sup>2</sup>Jet Propulsion Laboratory, California Institute of Technology, Pasadena, CA, USA

7                    <sup>3</sup>Space Science Institute, Center for Space Plasma Physics, Boulder, CO, USA

8                    <sup>4</sup>Department of Electrical and Computer Engineering, Virginia Tech, Blacksburg, VA, USA

9                    <sup>5</sup>Johns Hopkins University Applied Physics Laboratory, Laurel, MD, USA

10                    **Key Points:**

- 11                    • Space-ground conjugate observations point to magnetospheric whistler-mode waves  
12                    as the driver of ionospheric TEC perturbations (dTEC)
- 13                    • The amplitude spectra of dTEC and whistlers are consistent and the cross-correlation  
14                    between modeled and observed dTEC reaches 0.8
- 15                    • Whistler-mode wave amplitudes and dTEC are modulated by ULF waves, which  
16                    exhibit concurrent compressional and poloidal mode variations

**Abstract**

The weakly ionized plasma in the Earth's ionosphere is controlled by a complex interplay between solar and magnetospheric inputs from above, atmospheric processes from below, and plasma electrodynamics from within. This interaction results in ionosphere structuring and variability that pose major challenges for accurate ionosphere prediction for global navigation satellite system (GNSS) related applications and space weather research. The ionospheric structuring and variability are often probed using the total electron content (TEC) and its relative perturbations (dTEC). Among dTEC variations observed at high latitudes, a unique modulation pattern has been linked to magnetospheric ultra low frequency (ULF) waves, yet its underlying mechanisms remain unclear. Here using magnetically-conjugate observations from the THEMIS spacecraft and a ground-based GPS receiver at Fairbanks, Alaska, we provide direct evidence that these dTEC modulations are driven by magnetospheric electron precipitation induced by ULF-modulated whistler-mode waves. We observed peak-to-peak dTEC amplitudes reaching  $\sim 0.5$  TECU (1 TECU is equal to  $10^6$  electrons/m<sup>2</sup>) with modulations spanning scales of  $\sim 5$ –100 km. The cross-correlation between our modeled and observed dTEC reached  $\sim 0.8$  during the conjugacy period but decreased outside of it. The spectra of whistler-mode waves and dTEC also matched closely at ULF frequencies during the conjugacy period but diverged outside of it. Our findings elucidate the high-latitude dTEC generation from magnetospheric wave-induced precipitation, addressing a significant gap in current physics-based dTEC modeling. These results thus improve ionospheric dTEC prediction and enhance our understanding of magnetosphere-ionosphere coupling via ULF waves.

**Plain Language Summary**

Radio signals are refracted or diffracted as they traverse the ionosphere filled with free electrons. The ionosphere TEC, which is the total number of electrons along the ray-path from the satellite to a receiver, helps to correct refractive errors in the signal, while its relative perturbations dTEC can be used to probe diffractive fluctuations known as ionosphere scintillation. Refractive error degrades GNSS positioning service accuracy while scintillation leads to signal reception failures and disrupts navigation and communication. Thus, an accurate understanding and modeling of TEC and dTEC is vital for space weather monitoring and GNSS-related applications. This study analyzes conjugate observations of ionospheric dTEC from a ground-based GPS receiver and magnetospheric

whistler-mode waves (a distinct type of very-low-frequency electromagnetic waves) from the THEMIS spacecraft, which were well-aligned both in time and space. We find a good cross-correlation ( $\sim 0.8$ ) between observed and modeled dTEC, driven by whistler-induced magnetospheric electron precipitation. These results point to whistler-mode waves as the driver of the observed dTEC. Both dTEC and whistler-mode wave amplitudes were modulated by ULF waves. These findings enhance physics-based ionospheric TEC prediction and our understanding of magnetosphere-ionosphere coupling.

## 1 Introduction

The Earth’s ionosphere contains weakly ionized plasma in the atmosphere between approximately 80 km and 1000 km altitude. The state of ionospheric plasma is controlled by a complex interplay between solar and magnetospheric inputs from above, neutral atmospheric processes from below, and plasma electrodynamics from within. The resulting structuring and variability of ionospheric plasma have a major, adverse impact on the global navigation satellite system (GNSS) radio signals as they propagate through the ionosphere and experience varying degrees of refraction and diffraction (Morton et al., 2020). Refraction causes signal group delay and phase advance, leading to dominant errors in GNSS position, velocity, and time solutions, while diffraction causes stochastic intensity and phase fluctuations at the receiver, commonly known as ionospheric scintillation (Yeh & Liu, 1982; Rino, 2011). Scintillation leads to increased GNSS receiver measurement noise and errors and, in extreme cases, phase-tracking loss of lock or signal reception failures (Kintner et al., 2007). Thus, these ionospheric effects pose real threats to the reliability, continuity, and accuracy of GNSS operations and applications (Morton et al., 2020; Coster & Yizengaw, 2021). Understanding the causes for ionospheric structuring and variability is critical for forecasting their impacts on GNSS applications—a long-standing challenge for space weather research (Hey et al., 1946; Jakowski et al., 2011; Morton et al., 2020). The importance of this ionosphere forecasting has recently gained increased attention as the solar maximum unfolds and concerns over space weather events such as geomagnetic storms loom large (e.g., Kintner et al., 2007; Pulkkinen et al., 2017; Hapgood et al., 2022).

Ionospheric refraction is typically quantified by the total electron content (TEC), which is the total number of electrons within a unit cross section along the raypath extending from the receiver to the satellite. For dual-frequency GNSS or Global Position-

81 ing System (GPS) receivers, the TEC is estimated from differential group delays and carrier-  
82 phase advances (Mannucci et al., 1998; Ciraolo et al., 2007; McCaffrey & Jayachandran,  
83 2017). Global TEC maps, constructed from networks of GNSS receivers on the ground  
84 and in orbit, can be used not only to correct ionospheric effects in GNSS-related appli-  
85 cations but also to monitor large- and meso-scale traveling ionospheric disturbances, typ-  
86 ically exceeding 100 km in horizontal wavelength (Hunsucker, 1982; Themens et al., 2022;  
87 S.-R. Zhang et al., 2022). Travelling ionospheric disturbances may result from internal  
88 ionospheric dynamics or from atmospheric effects from below linked to natural hazards,  
89 such as tsunamis, earthquakes, explosions, and volcanic eruptions (Komjathy et al., 2016;  
90 Astafyeva, 2019). High-resolution TEC from individual receivers and its relative pertur-  
91 bations dTEC and rate of changes (ROTI) are often used for detecting small-scale iono-  
92 spheric irregularities and scintillation events (Pi et al., 1997; Cherniak et al., 2014; Mc-  
93 Caffrey & Jayachandran, 2019; Makarevich et al., 2021; Nishimura et al., 2023).

94 While empirical and climatological TEC models exist (Rideout & Coster, 2006; Jakowski  
95 et al., 2011), physics-based modeling of TEC perturbations remains challenging. One of  
96 the main challenges in physical modeling of dTEC and space weather prediction is the  
97 complex structuring and variability of ionosphere plasma. Rapid (<a few minutes) and  
98 small-scale (< $\sim 100$  km) dTEC are observed at both low and high latitudes but gener-  
99 ated by distinct mechanisms and drivers (Pi et al., 1997; Basu et al., 2002; Kintner et  
100 al., 2007; Spogli et al., 2009; Moen et al., 2013; Pilipenko et al., 2014; Jin et al., 2015;  
101 Prikryl et al., 2015; Watson, Jayachandran, Singer, et al., 2016; Fæhn Follestad et al.,  
102 2020). Near equatorial latitudes, these small-scale dTEC result from plasma bubbles or  
103 density depletions formed around post-sunset, primarily driven by the Rayleigh-Taylor  
104 instability associated with lower atmosphere-ionosphere coupling processes (C.-S. Huang  
105 & Kelley, 1996; Kelley, 2009; Xiong et al., 2010; Aa et al., 2020; Jin et al., 2020). At high  
106 latitudes, dTEC are associated with plasma irregularities in the auroral, cusp, and po-  
107 lar cap regions, spanning a few meters to hundreds of kilometers in spatial scale (e.g.,  
108 Basu et al., 1990; Moen et al., 2013; Spicher et al., 2017). These irregularities are pri-  
109 marily driven by solar-magnetosphere-ionosphere coupling, which involves a complex in-  
110 terplay and synergy among solar extreme-ultraviolet radiation, plasma  $\vec{E} \times \vec{B}$  drifts, charged-  
111 particle precipitation into the atmosphere, magnetic field-aligned currents, and various  
112 ionospheric plasma instabilities (Kelley, 2009; Moen et al., 2013; Spicher et al., 2015; Fæhn  
113 Follestad et al., 2020).

114 Among dTEC variations observed near the auroral latitudes, a unique modulation  
115 pattern has been linked to magnetospheric ultra low frequency (ULF) waves (Davies &  
116 Hartmann, 1976; Okuzawa & Davies, 1981; Skone, 2009; Pilipenko et al., 2014; Watson  
117 et al., 2015; Watson, Jayachandran, Singer, et al., 2016; Zhai et al., 2021). These ULF  
118 waves feature broadband or quasi-monochromatic geomagnetic pulsations with periods  
119 from about 0.2 to 600 s (Jacobs et al., 1964) and are considered to be crucial for energy  
120 and plasma transport throughout the solar-magnetosphere-ionosphere-thermosphere sys-  
121 tem (e.g., Southwood & Kivelson, 1981; M. K. Hudson et al., 2000, 2008; Hartinger et  
122 al., 2015, 2022; Zong et al., 2017). Skone (2009) noted that average power of ground-based  
123 ULF waves and dTEC exhibited similar temporal variations in the Pc3 band ( $\sim 22$ – $100$   
124 mHz). Pilipenko et al. (2014) observed a high coherence ( $\sim 0.9$ ) between dTEC and global  
125 Pc5 pulsations in a few mHz during a geomagnetic storm. Watson, Jayachandran, Singer,  
126 et al. (2016) also reported a high coherence and common power between dTEC and ULF  
127 radial magnetic field variations in the Pc4 band (6.7–22 mHz). Fully understanding ULF-  
128 induced ionospheric dTEC not only enhances the ionosphere forecasting during space  
129 weather events but also elucidates the critical pathways of geospace energy coupling and  
130 dissipation via ULF waves.

131 To date, despite numerous proposals for direct dTEC modulation mechanisms by  
132 ULF waves (Pilipenko et al., 2014), no mechanism has yet been conclusively established.  
133 Recently, Wang et al. (2020) have reported a storm-time event where duskside ionospheric  
134 density was modulated by ULF waves in the Pc5 range. Pc5-modulated density varia-  
135 tions observed from radar data were used to infer modulated precipitating electrons over  
136 an energy range of  $\sim 1$ – $500$  keV and an altitude range of  $\sim 80$ – $200$  km. Higher-energy pre-  
137 cipitating electrons deposit their energy and induce impact ionization at lower altitudes,  
138 whereas lower-energy electrons do so at higher altitudes. The authors postulated that  
139 the precipitation and density perturbations are likely due to electron pitch-angle scat-  
140 tered into the loss cone by ULF-modulated very low frequency whistler-mode waves.

141 This postulation of whistler-driven dTEC is supported by extensive observations  
142 and models that demonstrate that ULF waves often coexist with and modulate whistler-  
143 mode waves (Coroniti & Kennel, 1970; W. Li, Thorne, et al., 2011; W. Li, Bortnik, Thorne,  
144 Nishimura, et al., 2011; Watt et al., 2011; Jaynes et al., 2015; Xia et al., 2016, 2020; X.-  
145 J. Zhang et al., 2019; X. J. Zhang et al., 2020; X. Shi et al., 2022; L. Li et al., 2022, 2023).  
146 The modulation of the whistler-mode wave growth is potentially attributed to compression-

147 induced ambient thermal or resonant hot electron density variations (W. Li, Bortnik, Thorne,  
148 Nishimura, et al., 2011; Xia et al., 2016, 2020; X.-J. Zhang et al., 2019; X. J. Zhang et  
149 al., 2020), resonant electron anisotropy variations (W. Li, Thorne, et al., 2011; Watt et  
150 al., 2011), and nonlinear resonant effects from periodic magnetic field configuration vari-  
151 ations (L. Li et al., 2022, 2023). The periodic excitation of whistler-mode waves at ULF  
152 wave frequencies leads to periodic electron precipitation, which drives pulsating auro-  
153 ras (e.g., Miyoshi et al., 2010; Nishimura et al., 2010; Jaynes et al., 2015) and potentially  
154 explains many previously reported dTEC modulations at ULF frequencies (Pilipenko et  
155 al., 2014; Watson, Jayachandran, Singer, et al., 2016; Zhai et al., 2021).

156 However, it is challenging to establish a direct link between magnetospheric drivers  
157 and ionospheric dTEC during ULF modulation events due to several complicating fac-  
158 tors: (1) the path-integrated nature of dTEC, which strongly depend on the satellite-  
159 to-receiver raypath elevation (e.g., Jakowski et al., 1996; Komjathy, 1997), (2) inherent  
160 phase shifts due to coexisting propagation and modulation effects (Watson et al., 2015),  
161 particularly when conjugate observations are misaligned or not synchronized, and (3) the  
162 dynamic and turbulent nature of the auroral ionosphere (Kelley, 2009). Direct evidence  
163 linking dTEC to magnetospheric drivers is yet to be identified.

164 In this study, conjugate observations from the THEMIS spacecraft and the GPS  
165 receiver at Fairbanks, Alaska (FAIR) allow us to identify the driver of GPS dTEC as mag-  
166 netospheric electron precipitation induced by ULF-modulated whistler-mode waves. Fig-  
167 ure 1 illustrates the physical picture emerging from these magnetically-conjugate mag-  
168 netospheric and ionospheric observations of ULF waves, modulated whistler-mode waves,  
169 electron precipitation, and dTEC.

170 In what follows, Section 2 describes datasets and models employed to estimate whistler-  
171 driven precipitation and resulting dTEC. Section 3 presents a detailed analysis and cross-  
172 correlation between observed and modeled dTEC. Section 4 discusses the geophysical  
173 implications and applications of our results, which are followed by the main conclusions.

## 174 **2 Data and Methodology**

175 We derive 1-s TEC measurements from phase and pseudorange data collected by  
176 the GPS receiver at FAIR during 15:06–16:36 UT on July 3, 2013, processed at the Jet  
177 Propulsion Laboratory using the GipsyX and Global Ionospheric Mapping software (Komjathy

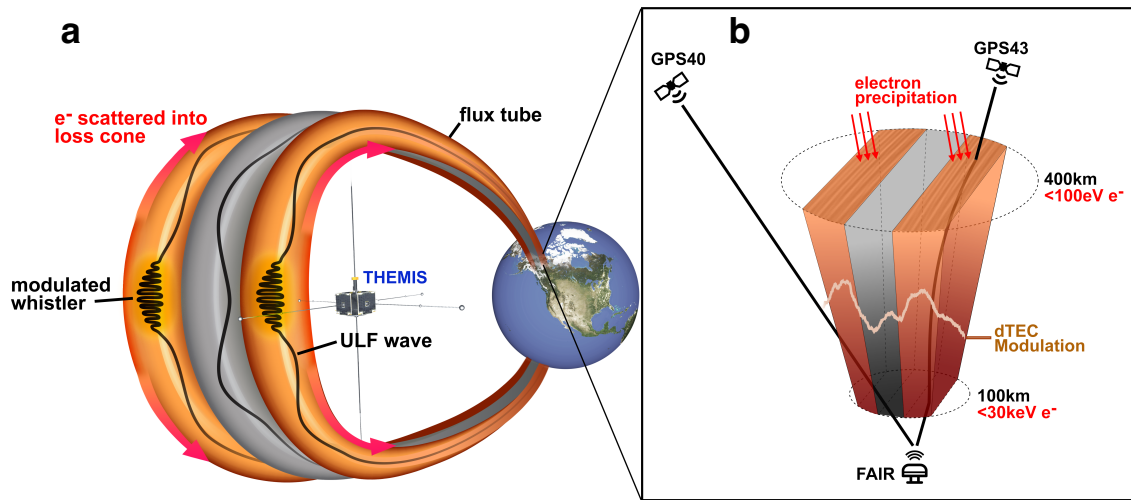

**Figure 1.** Schematic diagram showing coordinated observations from THEMIS and FAIR of (a) modulation of whistler-mode waves near the magnetic equator by ULF waves, electron pitch-angle scattering into the loss cone, and precipitation into the ionosphere (red arrows) induced by modulated whistler-mode waves; and (b) the modulated electron precipitation with energies of  $\sim 0.1\text{--}30$  keV deposits their energies at altitudes between  $\sim 100\text{--}400$  km and induces modulated impact ionization and dTEC having amplitudes as large as  $\sim 0.5$  TECU and spanning scales of  $\sim 5\text{--}100$  km. This dTEC modulation was captured by the signal from GPS43, which has a high elevation, but was overlooked by the signal from GPS40, which has a relatively lower elevation.

178 et al., 2005; Bertiger et al., 2020). Phase-based TEC measurements are leveled using pseu-  
179 dorange delays for each phase-connected data collection. We focus on links between FAIR  
180 and GPS satellites with pseudo random noise numbers 40, 43, and 60, referred to as GPS40,  
181 GPS43, and GPS60, whose ionospheric pierce points at 300 km altitude are within 200  
182 km proximity to FAIR, or pierce points at 150 km within 100 km proximity to FAIR,  
183 to ensure relatively high elevation angles and thus better observation geometry to resolve  
184 dTEC. The pierce point of 300 km altitude is selected based on the measured F2-region  
185 peak density height  $h_mF2$  from the ground-based ionosonde located at the Eielson sta-  
186 tion (64.66°N, 212.03°E) in Supporting Information. While the background density peaks  
187 at  $\sim 300$  km in the F2 region, the modulation of dTEC may be located at lower altitudes.  
188 Thus, we also present results using an ionosphere pierce point at 150 km altitude. The  
189 obtained TEC is expressed in TEC units (TECU), i.e.,  $10^{16}$  electrons/m<sup>2</sup>. The slant TEC  
190 is converted to VTEC using the standard mapping function (e.g., Mannucci et al., 1998).  
191 Measurements with elevation angles less than 30° are excluded to reduce multipath ef-  
192 fects (Jakowski et al., 1996). The VTEC data are then detrended to get dTEC using a  
193 fourth-order Butterworth lowpass filter. The low pass filter has a cutoff period of 25 min,  
194 to focus on ULF-related perturbations and reduce contributions from medium- and large-  
195 scale travelling ionosphere disturbances (Hunsucker, 1982).

196 We use the following datasets from THEMIS E (Angelopoulos, 2008): electron en-  
197 ergy and pitch-angle distributions measured by the Electrostatic Analyzers instrument  
198 in the energy range of several eV up to 30 keV (McFadden et al., 2008), DC vector mag-  
199 netic field at spin resolution ( $\sim 3$  s) measured by the Fluxgate Magnetometers (Auster  
200 et al., 2008), electric and magnetic field wave spectra within 1 Hz–4 kHz, measured ev-  
201 ery  $\sim 8$  s by the Digital Fields Board, the Electric Field Instrument, and the search coil  
202 magnetometer (Le Contel et al., 2008; Bonnell et al., 2008; Cully, Ergun, et al., 2008).  
203 Background electron densities are inferred from spacecraft potentials (Bonnell et al., 2008;  
204 Nishimura et al., 2013). We also use ground-based magnetometer measurements every  
205 1 s from the College (CMO) site operated by the United States Geological Survey Ge-  
206 omagnetism Program and from the Fort Yukon (FYKN) site operated by the Geophys-  
207 ical Institute at the University of Alaska.

208 THEMIS observations of electron distributions and wave spectra allow us to cal-  
209 culate the precipitating flux of electrons scattered into the loss cone by whistler-mode  
210 waves using quasilinear diffusion theory (Kennel & Engelmann, 1966; Lyons, 1974). For



whistler-mode wave normals  $\theta < 45^\circ$ , we use a validated analytical formula of bounce-averaged electron diffusion coefficients from Artemyev et al. (2013). For small pitch angle  $\alpha_{eq}$  approaching the loss cone  $\alpha_{LC}$ , the first-order cyclotron resonance provides the main contribution to the bounce-averaged diffusion rate:

$$\langle D_{\alpha_{eq}\alpha_{eq}} \rangle \simeq \frac{\pi B_w^2 \Omega_{ceq} \omega_m}{4\gamma B_{eq}^2 \Delta\omega (p\epsilon_{meq})^{13/9} T(\alpha_{LC}) \cos^2 \alpha_{LC}} \times \frac{\Delta\lambda_{R,N} (1 + 3 \sin^2 \lambda_R)^{7/12} (1 - \bar{\omega})}{|\gamma\bar{\omega} - 2\gamma\bar{\omega}^2 + 1| |1 - \gamma\bar{\omega}|^{4/9}}, \quad (1)$$

with  $B_w$  indicating the wave amplitude,  $\omega_m$  the mean wave frequency,  $\Delta\omega$  the frequency width,  $\bar{\omega} = \omega_m/\Omega_{ce}$  the normalized frequency,  $\Omega_{ce}$  and  $\Omega_{ceq}$  the local and equatorial electron cyclotron frequency,  $\gamma$  the relativistic factor,  $p$  the electron momentum,  $\epsilon_{meq} = \Omega_{pe}/\Omega_{ceq} \sqrt{\omega_m/\Omega_{ceq}}$  where  $\Omega_{pe}$  is the plasma frequency,  $T(\alpha_{eq})$  the bounce period,  $\lambda_R$  the latitude of resonance, and  $\Delta\lambda_{R,N}$  the latitudinal range of resonance (see details in Artemyev et al. (2013)). The precipitating differential energy flux within the loss cone can be estimated as  $x(E)J(E, \alpha_{LC})$ , where

$$x(E) = 2 \int_0^1 I_0(Z_0\tau) \tau d\tau / I_0(Z_0), \quad (2)$$

being the index of loss cone filling,  $J(E, \alpha_{LC})$  is the electron differential energy flux near the loss cone,  $I_0$  is the modified Bessel function with an argument  $Z_0 \simeq \alpha_{LC} / \sqrt{\langle D_{\alpha_{eq}\alpha_{eq}} \rangle \cdot \tau_{loss}}$  (Kennel & Petschek, 1966), and  $\tau_{loss}$  is assumed to be half of the bounce period.

With an energy distribution of precipitating electrons within 0.1–30 keV, we estimate the impact ionization rate altitude profile using the parameterization model developed by Fang et al. (2010), covering isotropic electron precipitation from 100 eV up to 1 MeV. This model, derived through fits to first-principle model results, allows efficient ionization computation for arbitrary energy spectra. Atmospheric density and scale height data were obtained from the NRLMSISE-00 model (Picone et al., 2002). We model dTEC resulting from whistler-induced electron precipitation by integrating ionization rates over altitude and time, adopting an 8-s integration period to align with the temporal resolution of THEMIS wave spectra data. Although our analysis does not concern equilibrium densities and omits recombination and convective effects, this has little impact because we focus on relative dTEC due to short-time precipitation. It takes nearly 60 s for the background ionosphere to relax to an equilibrium density solution for 10-keV precipitation and longer for lower energies (e.g., Kaeppler et al., 2022). Our estimated dTEC also closely match observed dTEC values, underscoring the effectiveness of our modeling approach despite its approximation.

### 3 Results

On July 3, 2013, from 15:06 to 16:36 UT, the THEMIS E spacecraft flew westward over the FAIR GPS receiver station, coming within  $\sim 20$  km relative to FAIR when mapped to 300 km altitude. The space-ground observations have a close spatial and temporal alignment, allowing us to link between magnetospheric and ionospheric processes along the field line. The event occurred at  $L \sim 7$ , outside the plasmopause of  $L_{pp} \sim 5.4$  (based on THEMIS E densities near 17:00 UT), near the magnetic local time (*MLT*) of 4.5 hr, and during a geomagnetic quiet time with  $Kp \sim 1$  and  $AE \sim 200$  nT. Figure 2a illustrates the trajectories of THEMIS E and the ionosphere pierce points of GPS40, GPS43, and GPS60 near FAIR, mapped to 300 km altitude. The position of THEMIS E is mapped along the field line to the ionosphere using the Tsyganenko T96 model (Tsyganenko, 1995) but the GPS satellites are mapped using line of sight. Of these GPS satellites, the GPS43 pierce points, moving eastward, were nearest to both the FAIR and THEMIS E footprints, exhibiting close longitudinal alignment. A notable conjugacy, marked by the bright red segment from 15:37 to 16:11 UT, occurred when the footprints of THEMIS E and GPS43 pierce points were within  $\sim 100$  km to each other and FAIR (Figure 2j). In Supporting Information, we also present the configuration when the satellites and their pierce points are mapped to an altitude of 150 km. This adjustment does not significantly alter the geometry of our conjunction event, but it does slightly reduce the scale of the satellite footpaths near FAIR.

Figures 2b–2d present THEMIS observations of whistler-mode waves. The observed wave frequencies were in the whistler lower band, spanning  $\sim 0.2$ – $0.5\Omega_{ce}$ , with a mean frequency  $\omega_m \sim 0.35\Omega_{ce}$ , and  $\Delta\omega \sim 0.15\Omega_{ce}$ , where the electron cyclotron frequency  $f_{ce} \sim \Omega_{ce}/2\pi \sim 2.15$  kHz. Figure 2d shows that whistler-mode wave amplitudes  $B_w$  range from several pT to over 100 pT, measured at 8-s cadence (black curve) and smoothed with 2-min moving averages (red curve). Short-term oscillations in  $B_w$  on the order of tens of seconds were observed atop more gradual variations of several minutes. We use smoothed or averaged  $B_w$  to estimate electron precipitation. Although direct waveform data for resolving whistler-mode wave normals were absent, we can infer wave normals based on the measured whistler spectra properties of  $E/cB \ll 1$  (see Supporting Information) as well as from previous statistical whistler observations in the nightside equatorial plasma sheet (W. Li, Bortnik, Thorne, & Angelopoulos, 2011; Agapitov et al., 2013; Meredith et al., 2021). The whistlers propagate quasi-parallel to the magnetic field, with an as-

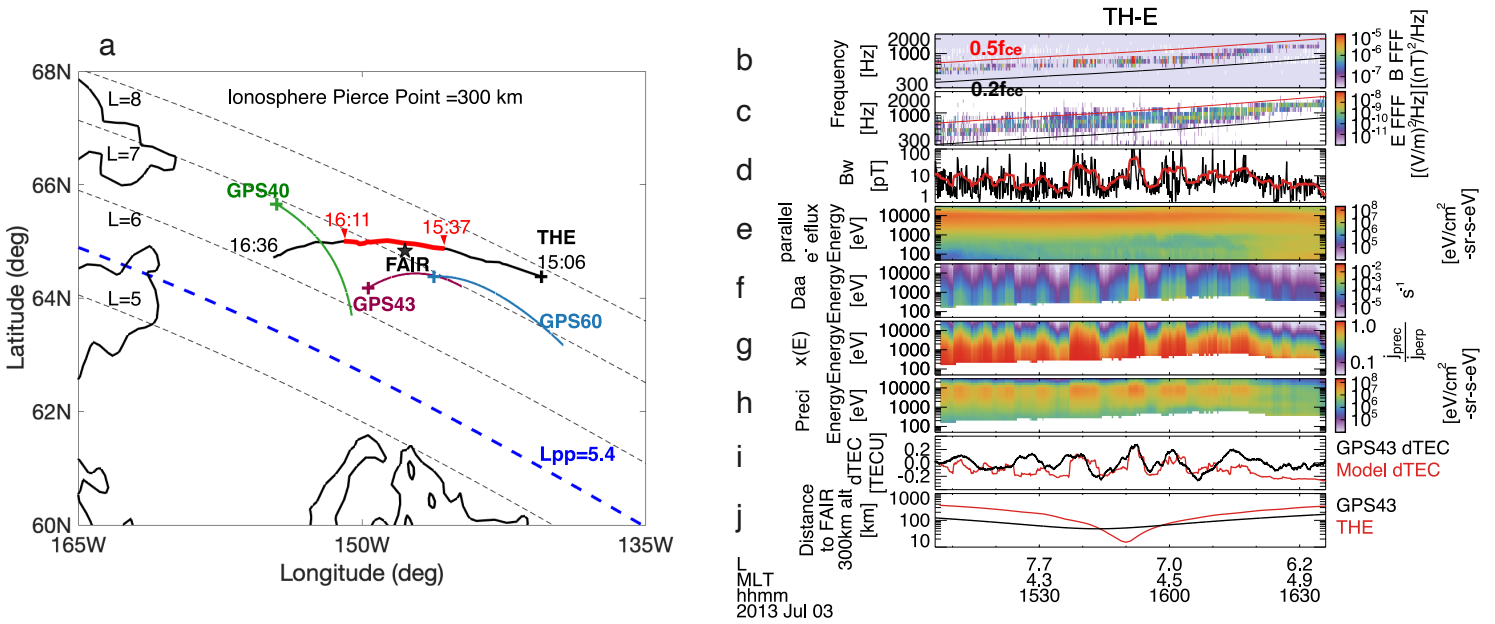

**Figure 2.** (a) Configuration of THEMIS E (black curve), GPS40, GPS43, and GPS60 satellites (green, purple, and blue curves), and the FAIR receiver (black star) in geographic coordinates, with THEMIS and GPS mapped onto 300 km altitude using T96 field tracing (THEMIS) or line of sight projection (GPS). The plus symbol indicates the start of the footpath. (b–e) THEMIS E magnetic field spectrogram, electric field spectrogram, whistler-mode wave amplitudes, and field-aligned ( $0^{\circ}$ – $22.5^{\circ}$ ) electron energy spectrogram. (f) Bounce-averaged electron diffusion rates. (g) Index of loss cone filling. (h) Whistler-driven precipitating electron energy spectrogram. (i) Comparison of whistler-driven model dTEC (red curve) and GPS43-observed dTEC (black curve). (j) Great-circle distances between THEMIS-E footpath (red curve) and GPS43 raypath (black curve) at IPP of 300 km relative to the FAIR station.

273 summed Gaussian wave normal width of  $\Delta\theta \sim 30^\circ$  and a latitudinal distribution within  
 274  $\pm 30^\circ$ .

275 Figures 2e–2h display the measured plasma sheet field-aligned ( $\alpha \sim [0^\circ, 22.5^\circ]$ ) elec-  
 276 trons from 50 eV up to 25 keV, calculated diffusion rates  $\langle D_{\alpha_{eq}\alpha_{eq}} \rangle$ , estimated loss cone  
 277 filling  $x(E)$ , and precipitating electron energy fluxes. Although  $\langle D_{\alpha_{eq}\alpha_{eq}} \rangle$  and  $x(E)$  in-  
 278 crease at lower energies, the precipitating energy fluxes peak between 1–10 keV, exhibit-  
 279 ing similar modulations as seen in the smoothed whistler-mode wave amplitude  $B_w$ . Elec-  
 280 tron precipitation fluxes below  $\sim 200$  eV are absent due to an energy threshold for elec-  
 281 tron cyclotron resonance interaction, with the lower limit primarily determined by the  
 282 ratio  $\Omega_{pe}/\Omega_{ce}$  ( $\sim 3$  in our case).

283 Figure 2i compares modeled (red) and directly measured dTEC (black) from the  
 284 GPS43 signal, revealing a nearly one-to-one phase correlation from 15:37 to 16:11 UT.  
 285 This period of close correlation coincides with the conjunction of THEMIS E, GPS43,  
 286 and FAIR, where their relative distances were within  $\sim 100$  km (Figure 2j). Outside this  
 287 conjugacy period and further away from the FAIR station, the correlation decreases. Ob-  
 288 served peak-to-peak amplitudes of dTEC reached  $\sim 0.5$  TECU, which is typical, though  
 289 not extreme, for the nightside auroral region. This particular event occurred during quiet  
 290 conditions; other events during storms may have much larger dTEC modulation ampli-  
 291 tudes (e.g., Watson et al., 2015), though more challenging to have such reliable conjunc-  
 292 tion, especially given uncertainties in magnetic field mapping during storms (e.g., C.-L. Huang  
 293 et al., 2008).

294 Figure 3 underscores the critical role of observation geometry and timing in detect-  
 295 ing phase correlations between modeled and measured dTEC across three GPS satellites.  
 296 Despite all three satellites having raypath elevation angles  $> 40^\circ$ —reducing the likelihood  
 297 of multi-path effects (e.g., Jakowski et al., 1996)—only the GPS43 elevation reached  $80^\circ$   
 298 above the FAIR station zenith (Figure 3a). During the conjugacy period, the pierce points  
 299 of GPS40 and GPS60 were distanced from FAIR by more than 200 km, while GPS43’s  
 300 pierce points remained within 100 km, coming within 20 km at its closest point (Figure 3b).  
 301 Figures 3c and 3d reveal that the modeled dTEC (red curve) aligns poorly with GPS40  
 302 and GPS60 dTEC (blue and magenta curves), but a significant cross-correlation ( $\sim 0.8$ )  
 303 emerges with GPS43 dTEC (black) during the conjugacy period. Before and after the  
 304 conjunction, dTEC phase shifts reduce the cross-correlation to  $-0.15$  and  $0.68$ , respec-

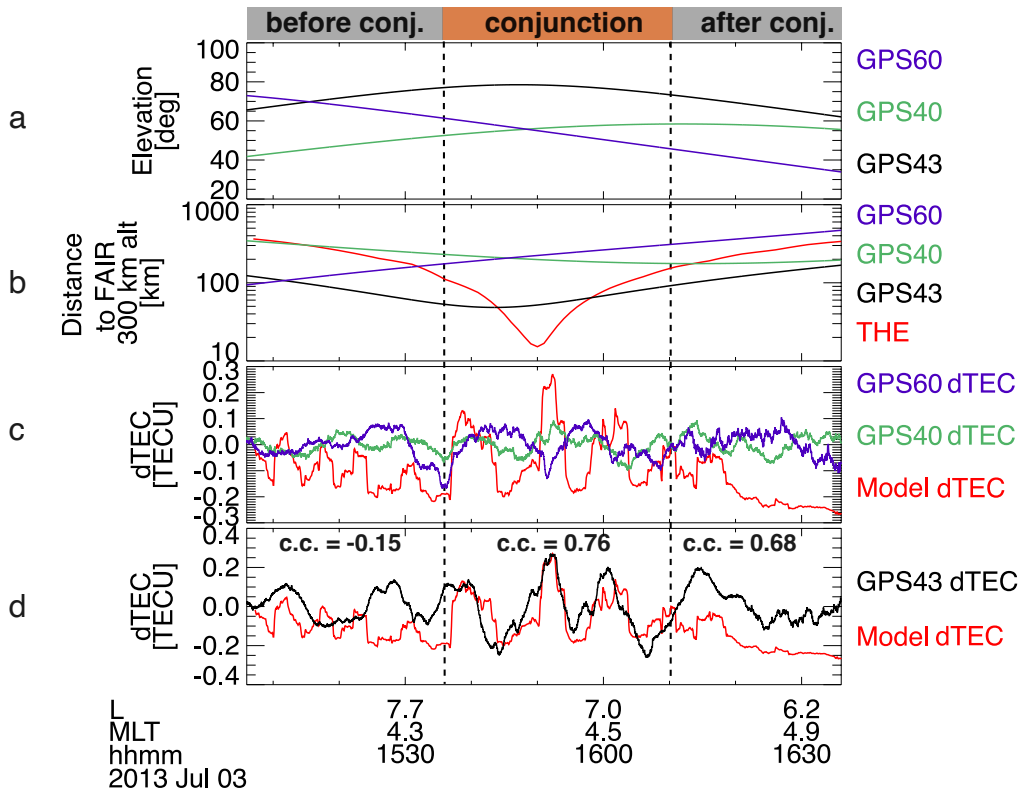

**Figure 3.** (a) Raypath elevation angles of GPS40 (green curve), GPS43 (black curve), and GPS60 (magenta curve). (b) Distances between THEMIS E footpath and GPS satellite pierce points relative to FAIR, displayed in the same format as Figure 1j. (c) Comparison between whistler-driven model dTEC and observed dTEC from GPS40 and GPS60, which were not in good conjunction with THEMIS or FAIR. (d) Comparison between whistler-driven model dTEC and GPS43-observed dTEC. The cross-correlation coefficients are -0.15, 0.76, and 0.68 during intervals before, during, and after conjunction, respectively.

305 tively. Given the near-parallel longitudinal alignment of GPS43 pierce points and THEMIS  
 306 E footprints (Figure 2a), the measured dTEC (black) potentially reflects both tempo-  
 307 ral and spatial/longitudinal modulations. These findings suggest that to reliably iden-  
 308 tify the electron precipitation responsible for dTEC requires precise spacecraft spatial  
 309 alignment, optimal timing, and high raypath elevations.

310 The modulation of dTEC, electron precipitation, and whistler-mode wave ampli-  
 311 tudes was linked to ULF wave activities in the Pc3-5 band (1.7 mHz to 100 mHz). Fig-  
 312 ure 4a display the magnetic field perturbations measured by THEMIS E in the mean field-  
 313 aligned coordinates, in which the parallel direction ( $\parallel$ , the compressional component)  
 314 is determined by 15-minute sliding averages of the magnetic field, the azimuthal direc-  
 315 tion ( $\phi$ , the toroidal component) is along the cross product of  $z$  and the spacecraft geo-  
 316 centric position vector, and the radial direction ( $r$ , the poloidal component) completes  
 317 the triad. Magnetic perturbations are obtained by subtracting the 15-minute mean field.  
 318 During the conjunction, THEMIS E detected both compressional Pc5 waves (red curve)  
 319 and poloidal Pc3-4 waves (blue curve). Figure 4b indicates that peaks in whistler-mode  
 320 wave amplitudes approximately align with troughs of compressional ULF waves, with  
 321 fine-scale whistler amplitudes primarily modulated by poloidal Pc3-4 waves (See Sup-  
 322 porting Information). Strong Pc5 ULF waves were also recorded in the  $H$ -component  
 323 magnetic field perturbations from magnetometers located at CMO and FYKN (Figures 4g-  
 324 4h), displaying a similar pattern but with greater amplitudes at FYKN, located slightly  
 325 north of FAIR. The discrepancy between ground- and space-measured Pc5 waves poten-  
 326 tially results from the localized nature of THEMIS-E observations (X. Shi et al., 2022)  
 327 and the screening/modification effects of ULF waves traversing the ionosphere (Hughes  
 328 & Southwood, 1976; Lysak, 1991; Lessard & Knudsen, 2001; X. Shi et al., 2018). Our  
 329 observations imply that the ionospheric dTEC were linked to ULF-modulated whistler-  
 330 mode waves and the associated electron precipitation (e.g., Coroniti & Kennel, 1970; W. Li,  
 331 Thorne, et al., 2011; Xia et al., 2016; X. J. Zhang et al., 2020; L. Li et al., 2023).

332 Figures 4b-4c compare small-scale/high-frequency fluctuations of whistler-mode  
 333 wave amplitudes  $B_w$  and dTEC, which was bandpass-filtered within the frequency range  
 334 of 5-200 mHz. The small-scale dTEC fluctuations exhibit similar wave periods to  $B_w$   
 335 fluctuations, evidently intensifying during the conjugacy period, yet lacking a clear phase  
 336 correlation seen with larger scale perturbations in Figure 3d. Figure 4d shows the rate  
 337 of TEC index ( $ROTI$ ), i.e., the standard deviation of the rate of TEC ( $ROT$ ) (Pi et al.,

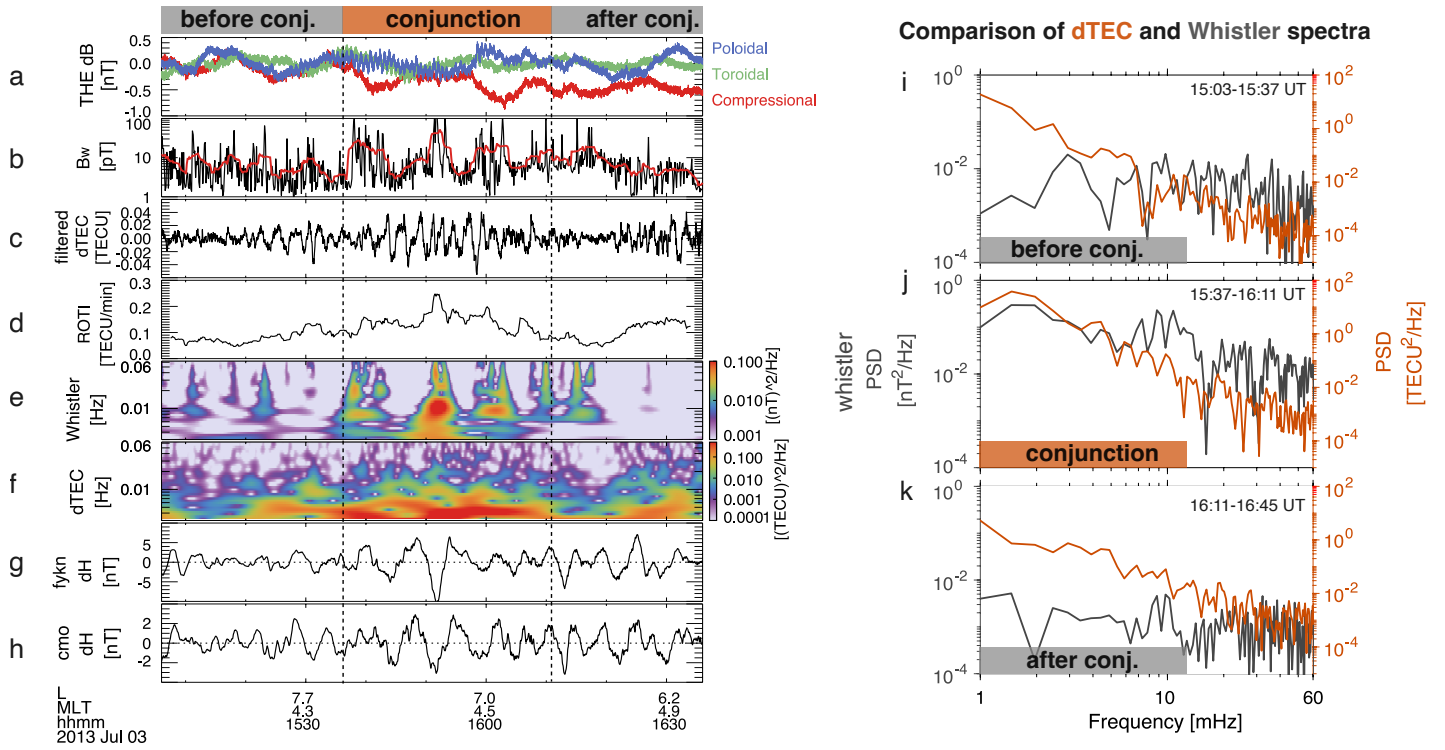

**Figure 4.** (a) THEMIS E magnetic field perturbations in the mean-field-aligned coordinates, exhibiting compressional- (red) and poloidal-mode (blue) variations. (b) THEMIS E whistler-mode wave amplitudes. The measured amplitudes are shown in black and smoothed in red. (c) dTEC bandpass filtered within 5–200 mHz. (d) *ROTI* from 200-s sliding window ensemble averaging. (e) Wavelet spectrogram of whistler-mode waves. (f) Wavelet spectrogram of GPS43 dTEC. (g) Ground-based magnetic field *H* component perturbations in 1.7–100 mHz from the Fort Yukon station. (h) Ground-based magnetic *H* component perturbations in 1.7–100 mHz from the College station. (i–k) Comparisons of dTEC (orange curves) and whistler-mode wave amplitude fluctuation spectra (gray curves) in 1–60 mHz measured before (i), during (j), and after (k) the conjugacy period.

1997), where  $ROT = (dTEC(t+\tau) - dTEC(t))/\tau$  with  $\tau = 10$  s,  $ROTI = \sqrt{\langle ROT^2 \rangle - \langle ROT \rangle^2}$  using 200-s sliding averages. Significant increases in  $ROTI$  were observed within the region of whistler-driven TEC perturbations. However, in our case the GPS signal fluctuations were predominantly refractive, as negligible fluctuations were detected at frequencies above 0.1 Hz (McCaffrey & Jayachandran, 2017, 2019; Nishimura et al., 2023).

Figures 4e–4f compare the wavelet spectrograms of whistler-mode wave  $B_w$  and dTEC, displaying concurrent increases in wave power for both in the frequency range of  $\sim 3$  mHz up to tens of mHz. Figures 4i–4k present a more detailed amplitude spectra comparison before, during, and after conjunction. Notably, only during the conjunction, whistler-mode wave amplitudes and dTEC share similar power spectral density distributions in the 1– $\sim 30$  mHz range. The peaks in whistler spectra were slightly and consistently larger than those in dTEC spectra within 3–20 mHz by factors of 1.05–1.2 with an average of 1.15, aligning with expected Doppler shift effects on ionospheric TEC measurements. The Doppler shift results from relative motion of GPS raypath (with pierce point velocities of  $\sim 46$  m/s at 300 km altitude in our case) and propagating TEC structures (typically with velocities of several hundred m/s) (Watson, Jayachandran, & MacDougall, 2016):  $f_{cor} = f_{obs}(1 + \frac{\mathbf{v}_{ipp} \cdot \mathbf{v}_{struct}}{|\mathbf{v}_{struct}|^2})$ , where  $f_{cor}$  is the frequency corrected for relative motion. Watson, Jayachandran, and MacDougall (2016) found that 89% of their statistical events required a correction factor of 1.2 or less for the Doppler shift, consistent with our observations. The agreement between dTEC and whistler amplitude spectra supports that the observed dTEC resulted from electron precipitation induced by whistler-mode waves.

The average Doppler shift factor of  $\sim 1.15$  obtained from Figure 4j allows us to estimate the plasma drift velocity from  $\vec{v}_{struct} \sim \vec{v}_{ipp}/0.15 \simeq 300$  m/s at the pierce point of 300 km altitude or 150 m/s at 150 km altitude. The spatial scales of the small-scale dTEC in Figure 4c can be estimated from  $ds = (|\vec{v}_{struct}| - |\vec{v}_{ipp}|)dt$ . The resulting wavelengths are  $\sim 10$ – $30$  km at the pierce point of 300 km altitude or  $\sim 5$ – $15$  km at 150 km altitude. In contrast, the larger-scale dTEC shown in Figure 3d have wavelengths of  $\sim 100$  km at 300 km altitude or  $\sim 50$  km at 150 km altitude. When mapped to the magnetosphere, the small-scale dTEC modulations correspond to a magnetospheric source region of  $\sim 150$ – $700$  km, while larger-scale dTEC modulations suggest a source region of  $\sim 1000$ – $2500$  km. These scales align with prior observations of the transverse scale sizes of chorus elements and their source regions (Santolík et al., 2003; Agapitov et al., 2017, 2018)



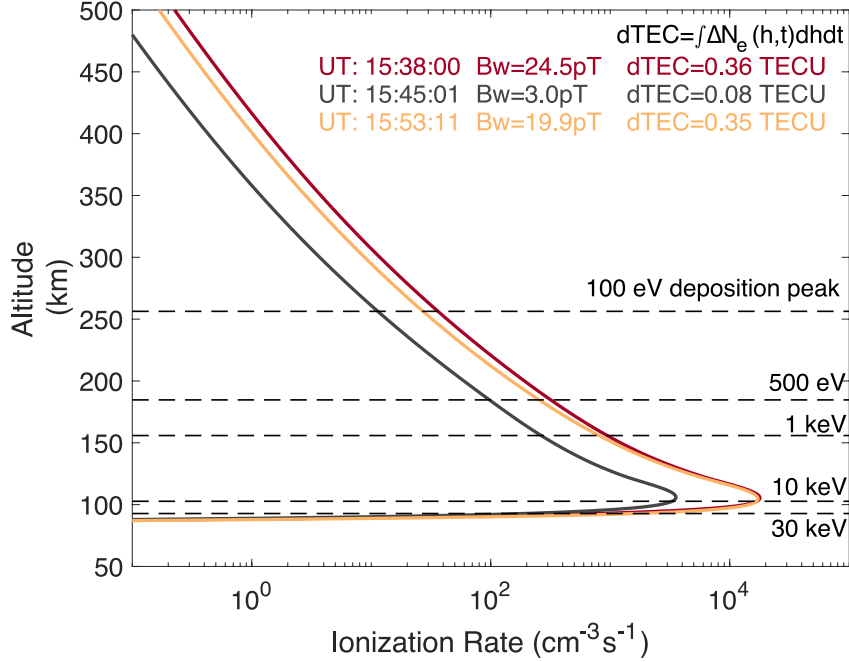

**Figure 5.** Ionization rate altitude profiles calculated at three time stamps of 15:38:00, 15:45:01, and 15:53:11 UT, corresponding to whistler-mode wave amplitudes of  $B_w = 24.5$  pT (red curve), 3.0 pT (gray curve), and 19.9 pT (orange curve). The dTEC were calculated by integrating ionization rates over altitude and time (8s). The dashed lines mark the peak deposition altitudes of 100 eV, 500 eV, 1 keV, 10 keV, and 30 keV precipitating monoenergetic electrons.

370 and also with the azimuthal wavelengths of high-m poloidal ULF waves (Yeoman et al.,  
 371 2012; X. Shi et al., 2018; Zong et al., 2017).

372 Figure 5 indicates that the electron precipitation, induced by ULF-modulated whistler-  
 373 mode waves, can cause significant increases in ionospheric ionization rate or column den-  
 374 sity, leading to dTEC of  $\sim 0.36$  TECU with a moderate whistler amplitude of  $B_w \sim 25$   
 375 pT. Given that large-amplitude whistler-mode waves exceeding several hundred pT fre-  
 376 quently occur in the inner magnetosphere (Cattell et al., 2008; Cully, Bonnell, & Ergun,  
 377 2008; Agapitov et al., 2014; Hartley et al., 2016; R. Shi et al., 2019), we anticipate even  
 378 larger dTEC from such whistler activities. We defer a statistical study including storm  
 379 time events and the potential connection with scintillation (e.g., McCaffrey & Jayachan-  
 380 dran, 2019; Nishimura et al., 2023) for the future. In addition, the primary energy range  
 381 of precipitation spans from  $\sim 100$  eV to  $\sim 30$  keV, contributing to density variations be-  
 382 tween  $\sim 90$ – $\sim 400$  km (Fang et al., 2010; Katoh et al., 2023; Berland et al., 2023).

## 4 Discussion

Various mechanisms have been proposed that link ULF waves to dTEC and ionospheric disturbances in general (Pilipenko et al., 2014). Although dTEC might arise from direct ULF wave effects through convective and divergent flows, MHD Alfvén-mode waves do not directly alter plasma density. Furthermore, mode-converted compressional waves, if present due to Hall currents, are evanescent in the ionosphere (Lessard & Knudsen, 2001), resulting in negligible TEC perturbations (Pilipenko et al., 2014).

The vertical component of the  $\vec{E} \times \vec{B}$  drift associated with ULF waves can induce vertical bulk motion of ionospheric plasma with a drift velocity  $v_z = E_y \cos I / B_0$ , where  $I$  is the local magnetic inclination. This vertical transport can alter the altitude-dependent recombination rate, thereby contributing to electron density or TEC modulations (Poole & Sutcliffe, 1987; Pilipenko et al., 2014). These effects are potentially important in mid-latitude and equatorial regions (Yizengaw et al., 2018; Zou et al., 2017) but are expected to be less significant at high latitudes where the magnetic inclination is large. In our case, the magnetic inclination angle is such that  $\cos I \sim 0.2$ , and the magnetic perturbations are only a few nT, resulting in electric field perturbations  $E_y < 1$  mV/m (Yizengaw et al., 2018). Based on similar estimations from Pilipenko et al. (2014), the resulting changes in  $dn_e/n_e$  or dTEC/TEC are only 0.04%, corresponding to dTEC of  $< 0.01$  TECU given a background TEC of  $\sim 20$  TECU. This level of dTEC is insignificant compared with the observed 0.5 TECU. Moreover, the timescales of TEC changes due to recombination rate changes associated with vertical plasma motion are typically longer than 1 hour (Yizengaw et al., 2006; Maruyama et al., 2004; Heelis et al., 2009), which are much larger than the ULF modulation timescales of several minutes observed in our case. Therefore, the observed ULF-modulated high-latitude dTEC are unlikely to be explained by vertical plasma transport and recombination rate changes in the F region.

A non-linear "feedback instability" mechanism may modify ULF wave dynamics, causing field-aligned current striations and significant bottom-side ionospheric density cavities and gradients (Lysak, 1991; Streltsov & Lotko, 2008). Furthermore, in the presence of pre-existing larger-scale density gradients, ULF-induced plasma flows may result in gradient drift instabilities and density striations and irregularities with scale sizes less than  $\sim 10$  km (Keskinen & Ossakow, 1983; Basu et al., 1990; Gondarenko & Guzdardar, 2004; Kelley, 2009; Spicher et al., 2015; Nishimura et al., 2021). Additionally, elec-

415 tron precipitation and Joule heating are important factors to consider in the auroral re-  
416 gion (e.g., Deng & Ridley, 2007; Sheng et al., 2020; Meng et al., 2022).

417 Detecting one-to-one phase correlation between ground-based ULF waves and dTEC  
418 may be challenging, largely due to ionospheric screening effects on ULF waves (Hughes  
419 & Southwood, 1976), with only a few exceptions noted during storm times (Pilipenko  
420 et al., 2014; Wang et al., 2020). However, this correlation has been frequently observed  
421 with spacecraft measurements of ULF waves (Watson et al., 2015; Watson, Jayachan-  
422 dran, Singer, et al., 2016; Zhai et al., 2021), indicating that magnetospheric processes  
423 may play an important role in driving ionospheric dTEC. Our findings support that mag-  
424 netospheric whistler-mode waves, modulated by ULF waves in the Pc3–5 band, are re-  
425 sponsible for these periodic dTEC through associated electron precipitation.

426 These results enhance our understanding of dTEC modulation by ULF waves, a  
427 topic widely discussed in the literature (Skone, 2009; Pilipenko et al., 2014; Watson et  
428 al., 2015; Watson, Jayachandran, Singer, et al., 2016; Wang et al., 2020; Zhai et al., 2021),  
429 and facilitates the integration of effects of magnetospheric whistler-mode waves into au-  
430 roral dTEC models. Statistical modeling of whistler-mode and ULF waves has been im-  
431 proving for several decades (e.g., Tsurutani & Smith, 1974; McPherron, 1972; Southwood  
432 & Hughes, 1983; Takahashi & Anderson, 1992; M. Hudson et al., 2004; Claudepierre et  
433 al., 2010; W. Li, Bortnik, Thorne, & Angelopoulos, 2011; Agapitov et al., 2013; Arte-  
434 myev et al., 2016; Tyler et al., 2019; Zong et al., 2017; Ma et al., 2020; X. J. Zhang et  
435 al., 2020; Shen et al., 2021; Sandhu et al., 2021; Hartinger et al., 2015, 2022, 2023). Lever-  
436 aging these wave effects and the associated electron precipitation can enhance physics-  
437 based modeling of ionospheric dTEC by providing better specifications of high-latitude  
438 drivers (Schunk et al., 2004; Ridley et al., 2006; Zettergren & Snively, 2015; Meng et al.,  
439 2016, 2020; Sheng et al., 2020; Verkhoglyadova et al., 2020; Huba & Drob, 2017). This  
440 wave-driven precipitation provides the dominant energy input to the ionosphere among  
441 all types of auroral precipitation (e.g., Newell et al., 2009), thus critically contributing  
442 to dTEC at high latitudes. As such, incorporating these magnetospheric phenomena is  
443 important for improving the accuracy of ionospheric dTEC models. This incorporation  
444 potentially benefits both GNSS-based applications and magnetosphere and ionosphere  
445 coupling science.

## 5 Conclusions

We present a detailed case study of ionospheric dTEC, using magnetically-conjugate observations from the THEMIS spacecraft and the GPS receiver at Fairbanks, Alaska. This conjunction setup allows us to identify the magnetospheric driver of the observed dTEC. Our key findings are summarized below:

- Combining in-situ wave and electron observations and quasilinear theory, we have modeled the electron precipitation induced by observed whistler-mode waves and deduced ionospheric dTEC based on impact ionization prediction. The cross-correlation between our modeled and observed dTEC reached  $\sim 0.8$  during the conjugacy period of  $\sim 30$  min but decreased outside of it.
- Observed peak-to-peak dTEC amplitudes reached  $\sim 0.5$  TECU, exhibiting modulations spanning scales of  $\sim 5$ – $100$  km. Within the modulated dTEC, enhancements in the rate of TEC index were measured to be  $\sim 0.2$  TECU/min.
- The whistler-mode waves and dTEC modulations were linked to ULF waves in the Pc3-5 band, featuring concurrent compressional and poloidal mode fluctuations. The amplitude spectra of whistler-mode waves and dTEC also agreed from 1 mHz to tens of mHz during the conjugacy period but diverged outside of it.

Thus, our results provide direct evidence that ULF-modulated whistler-mode waves in the magnetosphere drive electron precipitation leading to ionospheric dTEC modulations. Our observations also indicate that to reliably identify the electron precipitation responsible for dTEC requires precise spacecraft spatial alignment, optimal timing, and high raypath elevations. Our findings elucidate the high-latitude dTEC generation from magnetospheric wave-induced precipitation, which has not been adequately addressed in physics-based TEC models. Consequently, these results improve ionospheric dTEC prediction and enhance our understanding of magnetosphere-ionosphere coupling via ULF waves.

## Acknowledgments

This work has been supported by NASA projects 80NSSC23K0413, 80NSSC24K0138, and 80NSSC23K1038. Portions of the research were carried out at the Jet Propulsion Laboratory, California Institute of Technology, under a contract with NASA. O.P.V., M.D.H., and X.S. were supported by NASA project 80NSSC21K1683. O.P.V would like to thank

477 A.W. Moore (JPL) for data processing discussions. We are indebted to Emmanuel Ma-  
 478 songsong for help with the schematic figure.

## 479 **Open Research**

480 THEMIS data are available at [http://themis.ssl.berkeley.edu/data/themis/](http://themis.ssl.berkeley.edu/data/themis/the/12/)  
 481 [the/12/](http://themis.ssl.berkeley.edu/data/themis/the/12/). GPS RINEX data are publicly available from the NASA CDDIS archive of space  
 482 geodesy data ([https://cddis.nasa.gov/Data\\_and\\_Derived\\_Products/GNSS/high-rate](https://cddis.nasa.gov/Data_and_Derived_Products/GNSS/high-rate_data.html)  
 483 [\\_data.html](https://cddis.nasa.gov/Data_and_Derived_Products/GNSS/high-rate_data.html)). TEC data derived for this study is available at [https://doi.org/10.48577/](https://doi.org/10.48577/jpl.LGI5JS)  
 484 [jpl.LGI5JS](https://doi.org/10.48577/jpl.LGI5JS) (Verkhoglyadova, 2024). The access and processing of THEMIS and ground-  
 485 based magnetic field data from CMO and FYKN was done using SPEDAS V4.1, see Angelopoulos  
 486 et al. (2019). The original CMO data are provided by the USGS Geomagnetism Program  
 487 (<http://geomag.usgs.gov>) but can be accessed through [http://themis.ssl.berkeley](http://themis.ssl.berkeley.edu/data/themis/thg/12/mag/cmo/2013/)  
 488 [.edu/data/themis/thg/12/mag/cmo/2013/](http://themis.ssl.berkeley.edu/data/themis/thg/12/mag/cmo/2013/). FYKN data are part of the Geophysical  
 489 Institute Magnetometer Array operated by the Geophysical Institute, University of Alaska  
 490 (<https://www.gi.alaska.edu/monitors/magnetometer/archive>). The ionosonde data  
 491 from the Eielson station is available from <https://giro.uml.edu/ionoweb/>.

## 492 **Materials and Methods**

493 Y. Shen acknowledges the use of the tool of ChatGPT4 to assist with text editing  
 494 for some sentences of the Introduction and Results.

## 495 **References**

- 496 Aa, E., Zou, S., Eastes, R., Karan, D. K., Zhang, S.-R., Erickson, P. J., & Coster,  
 497 A. J. (2020, January). Coordinated Ground-Based and Space-Based Observa-  
 498 tions of Equatorial Plasma Bubbles. *Journal of Geophysical Research (Space*  
 499 *Physics)*, *125*(1), e27569. doi: 10.1029/2019JA027569
- 500 Agapitov, O. V., Artemyev, A., Krasnoselskikh, V., Khotyaintsev, Y. V., Moure-  
 501 nas, D., Breuillard, H., ... Rolland, G. (2013, June). Statistics of whistler  
 502 mode waves in the outer radiation belt: Cluster STAFF-SA measurements. *J.*  
 503 *Geophys. Res.*, *118*, 3407-3420. doi: 10.1002/jgra.50312
- 504 Agapitov, O. V., Artemyev, A., Mourenas, D., Krasnoselskikh, V., Bonnell, J., Le  
 505 Contel, O., ... Angelopoulos, V. (2014). The quasi-electrostatic mode of

- 506 chorus waves and electron nonlinear acceleration. *J. Geophys. Res.*, *119*,  
 507 1606–1626. doi: 10.1002/2013JA019223
- 508 Agapitov, O. V., Blum, L. W., Mozer, F. S., Bonnell, J. W., & Wygant, J. (2017,  
 509 March). Chorus whistler wave source scales as determined from multipoint  
 510 Van Allen Probe measurements. *Geophys. Res. Lett.*, *44*, 2634-2642. doi:  
 511 10.1002/2017GL072701
- 512 Agapitov, O. V., Mourenas, D., Artemyev, A., Mozer, F. S., Bonnell, J. W., An-  
 513 gelopoulos, V., ... Krasnoselskikh, V. (2018, October). Spatial Extent and  
 514 Temporal Correlation of Chorus and Hiss: Statistical Results From Multipoint  
 515 THEMIS Observations. *Journal of Geophysical Research (Space Physics)*,  
 516 *123*(10), 8317-8330. doi: 10.1029/2018JA025725
- 517 Angelopoulos, V. (2008, December). The THEMIS Mission. *Space Sci. Rev.*, *141*, 5-  
 518 34. doi: 10.1007/s11214-008-9336-1
- 519 Angelopoulos, V., Cruce, P., Drozdov, A., Grimes, E. W., Hatzigeorgiu, N., King,  
 520 D. A., ... Schroeder, P. (2019, January). The Space Physics Environ-  
 521 ment Data Analysis System (SPEDAS). *Space Sci. Rev.*, *215*, 9. doi:  
 522 10.1007/s11214-018-0576-4
- 523 Artemyev, A. V., Agapitov, O., Mourenas, D., Krasnoselskikh, V., Shastun, V., &  
 524 Mozer, F. (2016, April). Oblique Whistler-Mode Waves in the Earth's Inner  
 525 Magnetosphere: Energy Distribution, Origins, and Role in Radiation Belt Dy-  
 526 namics. *Space Sci. Rev.*, *200*(1-4), 261-355. doi: 10.1007/s11214-016-0252-5
- 527 Artemyev, A. V., Mourenas, D., Agapitov, O. V., & Krasnoselskikh, V. V. (2013,  
 528 April). Parametric validations of analytical lifetime estimates for radiation belt  
 529 electron diffusion by whistler waves. *Annales Geophysicae*, *31*, 599-624. doi:  
 530 10.5194/angeo-31-599-2013
- 531 Astafyeva, E. (2019, December). Ionospheric Detection of Natural Hazards. *Reviews*  
 532 *of Geophysics*, *57*(4), 1265-1288. doi: 10.1029/2019RG000668
- 533 Auster, H. U., Glassmeier, K. H., Magnes, W., Aydogar, O., Baumjohann,  
 534 W., Constantinescu, D., ... Wiedemann, M. (2008, December). The  
 535 THEMIS Fluxgate Magnetometer. *Space Sci. Rev.*, *141*, 235-264. doi:  
 536 10.1007/s11214-008-9365-9
- 537 Basu, S., Groves, K. M., Basu, S., & Sultan, P. J. (2002, November). Specification  
 538 and forecasting of scintillations in communication/navigation links: current

- 539 status and future plans. *Journal of Atmospheric and Solar-Terrestrial Physics*,  
 540 *64*(16), 1745-1754. doi: 10.1016/S1364-6826(02)00124-4
- 541 Basu, S., MacKenzie, E., Basu, S., Coley, W. R., Sharber, J. R., & Hoegy, W. R.  
 542 (1990, June). Plasma structuring by the gradient drift instability at high lati-  
 543 tudes and comparison with velocity shear driven processes. *J. Geophys. Res.*,  
 544 *95*(A6), 7799-7818. doi: 10.1029/JA095iA06p07799
- 545 Berland, G. D., Marshall, R. A., Capannolo, L., McCarthy, M. P., & Zheng, L.  
 546 (2023, November). Kinetic Modeling of Radiation Belt Electrons With Geant4  
 547 to Study Energetic Particle Precipitation in Earth's Atmosphere. *Earth and*  
 548 *Space Science*, *10*(11), e2023EA002987. doi: 10.1029/2023EA002987
- 549 Bertiger, W., Bar-Sever, Y., Dorsey, A., Haines, B., Harvey, N., Hemberger, D., ...  
 550 Willis, P. (2020, August). GipsyX/RTGx, a new tool set for space geodetic  
 551 operations and research. *Advances in Space Research*, *66*(3), 469-489. doi:  
 552 10.1016/j.asr.2020.04.015
- 553 Bonnell, J. W., Mozer, F. S., Delory, G. T., Hull, A. J., Ergun, R. E., Cully, C. M.,  
 554 ... Harvey, P. R. (2008, December). The Electric Field Instrument (EFI) for  
 555 THEMIS. *Space Sci. Rev.*, *141*, 303-341. doi: 10.1007/s11214-008-9469-2
- 556 Cattell, C., Wygant, J. R., Goetz, K., Kersten, K., Kellogg, P. J., von Rosenvinge,  
 557 T., ... Russell, C. T. (2008, January). Discovery of very large amplitude  
 558 whistler-mode waves in Earth's radiation belts. *Geophys. Res. Lett.*, *35*, 1105.  
 559 doi: 10.1029/2007GL032009
- 560 Cherniak, I., Krankowski, A., & Zakharenkova, I. (2014, August). Observation of  
 561 the ionospheric irregularities over the Northern Hemisphere: Methodology and  
 562 service. *Radio Science*, *49*(8), 653-662. doi: 10.1002/2014RS005433
- 563 Ciraolo, L., Azpilicueta, F., Brunini, C., Meza, A., & Radicella, S. M. (2007). Cali-  
 564 bration errors on experimental slant total electron content (TEC) determined  
 565 with GPS. *Journal of Geodesy*, *81*, 111-120.
- 566 Claudepierre, S. G., Hudson, M. K., Lotko, W., Lyon, J. G., & Denton, R. E. (2010,  
 567 November). Solar wind driving of magnetospheric ULF waves: Field line res-  
 568 onances driven by dynamic pressure fluctuations. *Journal of Geophysical Re-*  
 569 *search (Space Physics)*, *115*(A11), A11202. doi: 10.1029/2010JA015399
- 570 Coroniti, F. V., & Kennel, C. F. (1970, March). Electron precipitation pulsations.  
 571 *J. Geophys. Res.*, *75*(7), 1279-1289. doi: 10.1029/JA075i007p01279

- 572 Coster, A. J., & Yizengaw, E. (2021). Gnss/gps degradation from space weather.  
573 In *Space weather effects and applications* (p. 165-181). American Geophysical  
574 Union (AGU). doi: <https://doi.org/10.1002/9781119815570.ch8>
- 575 Cully, C. M., Bonnell, J. W., & Ergun, R. E. (2008, June). THEMIS observations  
576 of long-lived regions of large-amplitude whistler waves in the inner magneto-  
577 sphere. *Geophys. Res. Lett.*, *35*, 17. doi: 10.1029/2008GL033643
- 578 Cully, C. M., Ergun, R. E., Stevens, K., Nammari, A., & Westfall, J. (2008, Decem-  
579 ber). The THEMIS Digital Fields Board. *Space Sci. Rev.*, *141*, 343-355. doi:  
580 10.1007/s11214-008-9417-1
- 581 Davies, K., & Hartmann, G. K. (1976, July). Short-period fluctuations in total  
582 columnar electron content. *J. Geophys. Res.*, *81*(19), 3431. doi: 10.1029/  
583 JA081i019p03431
- 584 Deng, Y., & Ridley, A. J. (2007, September). Possible reasons for underestimat-  
585 ing Joule heating in global models: E field variability, spatial resolution, and  
586 vertical velocity. *Journal of Geophysical Research (Space Physics)*, *112*(A9),  
587 A09308. doi: 10.1029/2006JA012006
- 588 Fæhn Follestad, A., Herlingshaw, K., Ghadjari, H., Knudsen, D. J., McWilliams,  
589 K. A., Moen, J. I., . . . Oksavik, K. (2020, June). Dayside Field-Aligned  
590 Current Impacts on Ionospheric Irregularities. *Geophys. Res. Lett.*, *47*(11),  
591 e86722. doi: 10.1029/2019GL086722
- 592 Fang, X., Randall, C. E., Lummerzheim, D., Wang, W., Lu, G., Solomon, S. C.,  
593 & Frahm, R. A. (2010, November). Parameterization of monoenergetic  
594 electron impact ionization. *Geophys. Res. Lett.*, *37*(22), L22106. doi:  
595 10.1029/2010GL045406
- 596 Gondarenko, N. A., & Guzdar, P. N. (2004, September). Plasma patch structuring  
597 by the nonlinear evolution of the gradient drift instability in the high-latitude  
598 ionosphere. *Journal of Geophysical Research (Space Physics)*, *109*(A9),  
599 A09301. doi: 10.1029/2004JA010504
- 600 Hapgood, M., Liu, H., & Lugaz, N. (2022, March). SpaceX—Sailing Close  
601 to the Space Weather? *Space Weather*, *20*(3), e2022SW003074. doi:  
602 10.1029/2022SW00307410.1002/essoar.10510636.1
- 603 Hartinger, M. D., Elsdén, T., Archer, M. O., Takahashi, K., Wright, A. N., Arte-  
604 myev, A., . . . Angelopoulos, V. (2023, December). Properties of Magne-



- 605 tohydrodynamic Normal Modes in the Earth's Magnetosphere. *Journal*  
606 *of Geophysical Research (Space Physics)*, 128(12), e2023JA031987. doi:  
607 10.1029/2023JA031987
- 608 Hartinger, M. D., Moldwin, M. B., Zou, S., Bonnell, J. W., & Angelopoulos, V.  
609 (2015, January). ULF wave electromagnetic energy flux into the ionosphere:  
610 Joule heating implications. *Journal of Geophysical Research (Space Physics)*,  
611 120(1), 494-510. doi: 10.1002/2014JA020129
- 612 Hartinger, M. D., Takahashi, K., Drozdov, A. Y., Shi, X., Usanova, M. E., & Kress,  
613 B. (2022, April). ULF Wave Modeling, Effects, and Applications: Accom-  
614 plishments, Recent Advances, and Future. *Frontiers in Astronomy and Space*  
615 *Sciences*, 9, 867394. doi: 10.3389/fspas.2022.867394
- 616 Hartley, D. P., Kletzing, C. A., Kurth, W. S., Bounds, S. R., Averkamp, T. F.,  
617 Hospodarsky, G. B., ... Watt, C. E. J. (2016, May). Using the cold plasma  
618 dispersion relation and whistler mode waves to quantify the antenna sheath  
619 impedance of the Van Allen Probes EFW instrument. *Journal of Geophysical*  
620 *Research (Space Physics)*, 121(5), 4590-4606. doi: 10.1002/2016JA022501
- 621 Heelis, R. A., Sojka, J. J., David, M., & Schunk, R. W. (2009, March). Storm  
622 time density enhancements in the middle-latitude dayside ionosphere.  
623 *Journal of Geophysical Research (Space Physics)*, 114(A3), A03315. doi:  
624 10.1029/2008JA013690
- 625 Hey, J. S., Parsons, S. J., & Phillips, J. W. (1946, August). Fluctuations in Cos-  
626 mic Radiation at Radio-Frequencies. *Nature*, 158(4007), 234. doi: 10.1038/  
627 158234a0
- 628 Huang, C.-L., Spence, H. E., Singer, H. J., & Tsyganenko, N. A. (2008, April).  
629 A quantitative assessment of empirical magnetic field models at geosyn-  
630 chronous orbit during magnetic storms. *Journal of Geophysical Research*  
631 *(Space Physics)*, 113(A4), A04208. doi: 10.1029/2007JA012623
- 632 Huang, C.-S., & Kelley, M. C. (1996, January). Nonlinear evolution of equatorial  
633 spread F. 2. Gravity wave seeding of Rayleigh-Taylor instability. *J. Geophys.*  
634 *Res.*, 101(A1), 293-302. doi: 10.1029/95JA02210
- 635 Huba, J. D., & Drob, D. (2017, June). SAMI3 prediction of the impact of the 21  
636 August 2017 total solar eclipse on the ionosphere/plasmasphere system. *Geo-*  
637 *phys. Res. Lett.*, 44(12), 5928-5935. doi: 10.1002/2017GL073549

- 638 Hudson, M., Denton, R., Lessard, M., Miftakhova, E., & Anderson, R. (2004, Jan-  
639 uary). A study of Pc-5 ULF oscillations. *Annales Geophysicae*, *22*(1), 289-302.  
640 doi: 10.5194/angeo-22-289-2004
- 641 Hudson, M. K., Elkington, S. R., Lyon, J. G., & Goodrich, C. C. (2000, Jan-  
642 uary). Increase in Relativistic Electron Flux in the Inner Magnetosphere:  
643 ULF Wave Mode Structure. *Advances in Space Research*, *25*(12), 2327-2337.  
644 doi: 10.1016/S0273-1177(99)00518-9
- 645 Hudson, M. K., Kress, B. T., Mueller, H.-R., Zastrow, J. A., & Bernard Blake, J.  
646 (2008, March). Relationship of the Van Allen radiation belts to solar wind  
647 drivers. *Journal of Atmospheric and Solar-Terrestrial Physics*, *70*, 708-729.  
648 doi: 10.1016/j.jastp.2007.11.003
- 649 Hughes, W. J., & Southwood, D. J. (1976, July). The screening of micropulsation  
650 signals by the atmosphere and ionosphere. *J. Geophys. Res.*, *81*(19), 3234.  
651 doi: 10.1029/JA081i019p03234
- 652 Hunsucker, R. D. (1982, May). Atmospheric Gravity Waves Generated in the High-  
653 Latitude Ionosphere: A Review (Paper 1R1822). *Reviews of Geophysics and*  
654 *Space Physics*, *20*, 293. doi: 10.1029/RG020i002p00293
- 655 Jacobs, J. A., Kato, Y., Matsushita, S., & Troitskaya, V. A. (1964, January). Classi-  
656 fication of Geomagnetic Micropulsations. *J. Geophys. Res.*, *69*, 180-181. doi:  
657 10.1029/JZ069i001p00180
- 658 Jakowski, N., Mayer, C., Hoque, M., & Wilken, V. (2011). Total electron content  
659 models and their use in ionosphere monitoring. *Radio Science*, *46*(06), 1-11.
- 660 Jakowski, N., Sardon, E., Engler, E., Jungstand, A., & Klähn, D. (1996, De-  
661 cember). Relationships between GPS-signal propagation errors and  
662 EISCAT observations. *Annales Geophysicae*, *14*(12), 1429-1436. doi:  
663 10.1007/s00585-996-1429-0
- 664 Jaynes, A. N., Lessard, M. R., Takahashi, K., Ali, A. F., Malaspina, D. M., Michell,  
665 R. G., ... Wygant, J. R. (2015, October). Correlated Pc4-5 ULF waves,  
666 whistler-mode chorus, and pulsating aurora observed by the Van Allen  
667 Probes and ground-based systems. *J. Geophys. Res.*, *120*, 8749-8761. doi:  
668 10.1002/2015JA021380
- 669 Jin, Y., Moen, J. I., & Miloch, W. J. (2015). On the collocation of the cusp au-  
670 rora and the GPS phase scintillation: A statistical study. *Journal of Geophysi-*

- 671 *cal Research: Space Physics*, 120(10), 9176–9191.
- 672 Jin, Y., Xiong, C., Clausen, L., Spicher, A., Kotova, D., Brask, S., . . . Miloch, W.  
673 (2020, July). Ionospheric Plasma Irregularities Based on In Situ Measurements  
674 From the Swarm Satellites. *Journal of Geophysical Research (Space Physics)*,  
675 125(7), e28103. doi: 10.1029/2020JA028103
- 676 Kaeppeler, S. R., Marshall, R., Sanchez, E. R., Juarez Madera, D. H., Troyer, R., &  
677 Jaynes, A. N. (2022, December). pyGPI5: A python D- and E-region chem-  
678 istry and ionization model. *Frontiers in Astronomy and Space Sciences*, 9,  
679 338. doi: 10.3389/fspas.2022.1028042
- 680 Katoh, Y., Rosendahl, P. S., Ogawa, Y., Hiraki, Y., & Tadokoro, H. (2023, Decem-  
681 ber). Effect of the mirror force on the collision rate due to energetic electron  
682 precipitation: Monte Carlo simulations. *Earth, Planets and Space*, 75(1), 117.  
683 doi: 10.1186/s40623-023-01871-y
- 684 Kelley, M. C. (2009). *The Earth's ionosphere: Plasma physics and electrodynamics*.  
685 Academic press.
- 686 Kennel, C. F., & Engelmann, F. (1966, November). Velocity Space Diffusion from  
687 Weak Plasma Turbulence in a Magnetic Field. *Physics of Fluids*, 9, 2377-2388.  
688 doi: 10.1063/1.1761629
- 689 Kennel, C. F., & Petschek, H. E. (1966, January). Limit on Stably Trapped Particle  
690 Fluxes. *J. Geophys. Res.*, 71, 1-28.
- 691 Keskinen, M. J., & Ossakow, S. L. (1983, January). Nonlinear evolution of convect-  
692 ing plasma enhancements in the auroral ionosphere, 2. Small scale irregulari-  
693 ties. *J. Geophys. Res.*, 88(A1), 474-482. doi: 10.1029/JA088iA01p00474
- 694 Kintner, P. M., Ledvina, B. M., & de Paula, E. R. (2007, September). GPS  
695 and ionospheric scintillations. *Space Weather*, 5(9), 09003. doi: 10.1029/  
696 2006SW000260
- 697 Komjathy, A. (1997). *Global ionospheric total electron content mapping using the*  
698 *global positioning system* (Unpublished doctoral dissertation). University of  
699 New Brunswick, Canada.
- 700 Komjathy, A., Sparks, L., Wilson, B. D., & Mannucci, A. J. (2005, December).  
701 Automated daily processing of more than 1000 ground-based GPS receivers  
702 for studying intense ionospheric storms. *Radio Science*, 40(6), RS6006. doi:  
703 10.1029/2005RS003279

- 704 Komjathy, A., Yang, Y.-M., Meng, X., Verkhoglyadova, O., Mannucci, A. J.,  
 705 & Langley, R. B. (2016, July). Review and perspectives: Understand-  
 706 ing natural-hazards-generated ionospheric perturbations using GPS mea-  
 707 surements and coupled modeling. *Radio Science*, *51*(7), 951-961. doi:  
 708 10.1002/2015RS005910
- 709 Le Contel, O., Roux, A., Robert, P., Coillot, C., Bouabdellah, A., de La Porte,  
 710 B., ... Larson, D. (2008, December). First Results of the THEMIS  
 711 Search Coil Magnetometers. *Space Sci. Rev.*, *141*, 509-534. doi: 10.1007/  
 712 s11214-008-9371-y
- 713 Lessard, M. R., & Knudsen, D. J. (2001, October). Ionospheric reflection of small-  
 714 scale Alfvén waves. *Geophys. Res. Lett.*, *28*(18), 3573-3576. doi: 10.1029/  
 715 2000GL012529
- 716 Li, L., Omura, Y., Zhou, X.-Z., Zong, Q.-G., Rankin, R., Yue, C., & Fu, S.-  
 717 Y. (2022, May). Nonlinear Wave Growth Analysis of Chorus Emissions  
 718 Modulated by ULF Waves. *Geophys. Res. Lett.*, *49*(10), e97978. doi:  
 719 10.1029/2022GL097978
- 720 Li, L., Omura, Y., Zhou, X.-Z., Zong, Q.-G., Rankin, R., Yue, C., ... Ren, J. (2023,  
 721 February). Chorus Wave Generation Modulated by Field Line Resonance and  
 722 Mirror-Mode ULF Waves. *Journal of Geophysical Research (Space Physics)*,  
 723 *128*(2), e2022JA031127. doi: 10.1029/2022JA031127
- 724 Li, W., Bortnik, J., Thorne, R. M., & Angelopoulos, V. (2011, December). Global  
 725 distribution of wave amplitudes and wave normal angles of chorus waves  
 726 using THEMIS wave observations. *J. Geophys. Res.*, *116*, 12205. doi:  
 727 10.1029/2011JA017035
- 728 Li, W., Bortnik, J., Thorne, R. M., Nishimura, Y., Angelopoulos, V., & Chen, L.  
 729 (2011, June). Modulation of whistler mode chorus waves: 2. Role of density  
 730 variations. *J. Geophys. Res.*, *116*, A06206. doi: 10.1029/2010JA016313
- 731 Li, W., Thorne, R. M., Bortnik, J., Nishimura, Y., & Angelopoulos, V. (2011, June).  
 732 Modulation of whistler mode chorus waves: 1. Role of compressional Pc4-5  
 733 pulsations. *J. Geophys. Res.*, *116*, A06205. doi: 10.1029/2010JA016312
- 734 Lyons, L. R. (1974, December). Pitch angle and energy diffusion coefficients from  
 735 resonant interactions with ion-cyclotron and whistler waves. *Journal of Plasma*  
 736 *Physics*, *12*, 417-432. doi: 10.1017/S002237780002537X

- 737 Lysak, R. L. (1991, February). Feedback instability of the ionospheric resonant cav-  
 738 ity. *J. Geophys. Res.*, *96*(A2), 1553-1568. doi: 10.1029/90JA02154
- 739 Ma, Q., Connor, H. K., Zhang, X. J., Li, W., Shen, X. C., Gillespie, D., ... Spence,  
 740 H. E. (2020, August). Global Survey of Plasma Sheet Electron Precipitation  
 741 due to Whistler Mode Chorus Waves in Earth's Magnetosphere. *Geophys.*  
 742 *Res. Lett.*, *47*(15), e88798. doi: 10.1029/2020GL088798
- 743 Makarevich, R. A., Crowley, G., Azeem, I., Ngwira, C., & Forsythe, V. V. (2021,  
 744 May). Auroral E Region as a Source Region for Ionospheric Scintillation.  
 745 *Journal of Geophysical Research (Space Physics)*, *126*(5), e29212. doi:  
 746 10.1029/2021JA029212
- 747 Mannucci, A. J., Wilson, B. D., Yuan, D. N., Ho, C. H., Lindqwister, U. J., &  
 748 Runge, T. F. (1998, May). A global mapping technique for GPS-derived  
 749 ionospheric total electron content measurements. *Radio Science*, *33*(3), 565-  
 750 582. doi: 10.1029/97RS02707
- 751 Maruyama, T., Ma, G., & Nakamura, M. (2004, October). Signature of TEC storm  
 752 on 6 November 2001 derived from dense GPS receiver network and ionosonde  
 753 chain over Japan. *Journal of Geophysical Research (Space Physics)*, *109*(A10),  
 754 A10302. doi: 10.1029/2004JA010451
- 755 McCaffrey, A. M., & Jayachandran, P. T. (2017, June). Observation of subsecond  
 756 variations in auroral region total electron content using 100 Hz sampling of  
 757 GPS observables. *Journal of Geophysical Research (Space Physics)*, *122*(6),  
 758 6892-6900. doi: 10.1002/2017JA024255
- 759 McCaffrey, A. M., & Jayachandran, P. T. (2019, February). Determination of the  
 760 Refractive Contribution to GPS Phase "Scintillation". *Journal of Geophysical*  
 761 *Research (Space Physics)*, *124*(2), 1454-1469. doi: 10.1029/2018JA025759
- 762 McFadden, J. P., Carlson, C. W., Larson, D., Ludlam, M., Abiad, R., Elliott, B.,  
 763 ... Angelopoulos, V. (2008, December). The THEMIS ESA Plasma In-  
 764 strument and In-flight Calibration. *Space Sci. Rev.*, *141*, 277-302. doi:  
 765 10.1007/s11214-008-9440-2
- 766 McPherron, R. L. (1972, September). Substorm related changes in the geomagnetic  
 767 tail: The growth phase. *Planetary Space Science*, *20*, 1521-1539. doi: 10.1016/  
 768 0032-0633(72)90054-2
- 769 Meng, X., Mannucci, A. J., Verkhoglyadova, O. P., & Tsurutani, B. T. (2016, April).

- 770 On forecasting ionospheric total electron content responses to high-speed solar  
771 wind streams. *Journal of Space Weather and Space Climate*, 6, A19. doi:  
772 10.1051/swsc/2016014
- 773 Meng, X., Mannucci, A. J., Verkhoglyadova, O. P., Tsurutani, B. T., Ridley, A. J.,  
774 & Shim, J.-S. (2020, February). Thermosphere-Ionosphere Modeling With  
775 Forecastable Inputs: Case Study of the June 2012 High-Speed Stream Geo-  
776 magnetic Storm. *Space Weather*, 18(2), e02352. doi: 10.1029/2019SW002352
- 777 Meng, X., Ozturk, D. S., Verkhoglyadova, O. P., Varney, R. H., Reimer, A. S., Seme-  
778 ter, J. L., . . . Zhan, W. (2022, December). Energy Deposition by Mesoscale  
779 High-Latitude Electric Fields Into the Thermosphere During the 26 October  
780 2019 Geomagnetic Storm. *Journal of Geophysical Research (Space Physics)*,  
781 127(12), e2022JA030716. doi: 10.1029/2022JA030716
- 782 Meredith, N. P., Bortnik, J., Horne, R. B., Li, W., & Shen, X.-C. (2021). Statisti-  
783 cal investigation of the frequency dependence of the chorus source mechanism  
784 of plasmaspheric hiss. *Geophysical Research Letters*, 48(6), e2021GL092725.  
785 Retrieved from [https://agupubs.onlinelibrary.wiley.com/doi/abs/](https://agupubs.onlinelibrary.wiley.com/doi/abs/10.1029/2021GL092725)  
786 [10.1029/2021GL092725](https://doi.org/10.1029/2021GL092725) (e2021GL092725 2021GL092725) doi: [https://](https://doi.org/10.1029/2021GL092725)  
787 [doi.org/10.1029/2021GL092725](https://doi.org/10.1029/2021GL092725)
- 788 Miyoshi, Y., Katoh, Y., Nishiyama, T., Sakanoi, T., Asamura, K., & Hirahara, M.  
789 (2010, October). Time of flight analysis of pulsating aurora electrons, consid-  
790 ering wave-particle interactions with propagating whistler mode waves. *J.*  
791 *Geophys. Res.*, 115, A10312. doi: 10.1029/2009JA015127
- 792 Moen, J., Oksavik, K., Alfonsi, L., Daabakk, Y., Romano, V., & Spogli, L. (2013,  
793 January). Space weather challenges of the polar cap ionosphere. *Journal of*  
794 *Space Weather and Space Climate*, 3, A02. doi: 10.1051/swsc/2013025
- 795 Morton, Y. J., Yang, Z., Breitsch, B., Bourne, H., & Rino, C. (2020). Ionospheric ef-  
796 fects, monitoring, and mitigation techniques. In *Position, navigation, and tim-*  
797 *ing technologies in the 21st century* (p. 879-937). John Wiley Sons, Ltd. doi:  
798 <https://doi.org/10.1002/9781119458449.ch31>
- 799 Newell, P. T., Sotirelis, T., & Wing, S. (2009, September). Diffuse, monoenergetic,  
800 and broadband aurora: The global precipitation budget. *J. Geophys. Res.*,  
801 114, A09207. doi: 10.1029/2009JA014326
- 802 Nishimura, Y., Bortnik, J., Li, W., Thorne, R. M., Lyons, L. R., Angelopoulos, V.,

- 803 ... Auster, U. (2010, October). Identifying the Driver of Pulsating Aurora.  
804 *Science*, *330*, 81-84. doi: 10.1126/science.1193186
- 805 Nishimura, Y., Bortnik, J., Li, W., Thorne, R. M., Ni, B., Lyons, L. R., ... Auster,  
806 U. (2013, Feb). Structures of dayside whistler-mode waves deduced from  
807 conjugate diffuse aurora. *Journal of Geophysical Research (Space Physics)*,  
808 *118*(2), 664-673. doi: 10.1029/2012JA018242
- 809 Nishimura, Y., Kelly, T., Jayachandran, P. T., Mrak, S., Semeter, J. L., Dono-  
810 van, E. F., ... Nishitani, N. (2023, August). Nightside High-Latitude  
811 Phase and Amplitude Scintillation During a Substorm Using 1-Second Scin-  
812 tillation Indices. *Journal of Geophysical Research (Space Physics)*, *128*(8),  
813 e2023JA031402. doi: 10.1029/2023JA031402
- 814 Nishimura, Y., Mrak, S., Semeter, J. L., Coster, A. J., Jayachandran, P. T., Groves,  
815 K. M., ... Ruohoniemi, J. M. (2021, June). Evolution of Mid-latitude Density  
816 Irregularities and Scintillation in North America During the 7-8 September  
817 2017 Storm. *Journal of Geophysical Research (Space Physics)*, *126*(6), e29192.  
818 doi: 10.1029/2021JA029192
- 819 Okuzawa, T., & Davies, K. (1981, March). Pulsations in total columnar elec-  
820 tron content. *J. Geophys. Res.*, *86*(A3), 1355-1364. doi: 10.1029/  
821 JA086iA03p01355
- 822 Pi, X., Mannucci, A. J., Lindqwister, U. J., & Ho, C. M. (1997, September). Mon-  
823 itoring of global ionospheric irregularities using the Worldwide GPS Network.  
824 *Geophys. Res. Lett.*, *24*(18), 2283-2286. doi: 10.1029/97GL02273
- 825 Picone, J. M., Hedin, A. E., Drob, D. P., & Aikin, A. C. (2002, December).  
826 NRLMSISE-00 empirical model of the atmosphere: Statistical comparisons and  
827 scientific issues. *Journal of Geophysical Research (Space Physics)*, *107*(A12),  
828 1468. doi: 10.1029/2002JA009430
- 829 Pilipenko, V., Belakhovsky, V., Murr, D., Fedorov, E., & Engebretson, M. (2014,  
830 June). Modulation of total electron content by ULF Pc5 waves. *Jour-  
831 nal of Geophysical Research (Space Physics)*, *119*(6), 4358-4369. doi:  
832 10.1002/2013JA019594
- 833 Poole, A. W. V., & Sutcliffe, P. R. (1987, March). Mechanisms for observed total  
834 electron content pulsations at midlatitudes. *Journal of Atmospheric and Ter-  
835 restrial Physics*, *49*, 231-236. doi: 10.1016/0021-9169(87)90058-4

- 836 Prikryl, P., Jayachandran, P. T., Chadwick, R., & Kelly, T. D. (2015, May).  
 837 Climatology of GPS phase scintillation at northern high latitudes for the  
 838 period from 2008 to 2013. *Annales Geophysicae*, *33*(5), 531-545. doi:  
 839 10.5194/angeo-33-531-2015
- 840 Pulkkinen, A., Bernabeu, E., Thomson, A., Viljanen, A., Pirjola, R., Boteler, D.,  
 841 ... MacAlester, M. (2017, Jul). Geomagnetically induced currents: Science,  
 842 engineering, and applications readiness. *Space Weather*, *15*(7), 828-856. doi:  
 843 10.1002/2016SW001501
- 844 Rideout, W., & Coster, A. (2006, May). Automated GPS processing for global to-  
 845 tal electron content data. *GPS Solutions*, *10*, 219-228. doi: 10.1007/s10291-006  
 846 -0029-5
- 847 Ridley, A. J., Deng, Y., & Tóth, G. (2006, May). The global ionosphere thermo-  
 848 sphere model. *Journal of Atmospheric and Solar-Terrestrial Physics*, *68*(8),  
 849 839-864. doi: 10.1016/j.jastp.2006.01.008
- 850 Rino, C. (2011). *The theory of scintillation with applications in remote sensing*.  
 851 John Wiley & Sons.
- 852 Sandhu, J. K., Rae, I. J., Staples, F. A., Hartley, D. P., Walach, M. T., Elsdén, T.,  
 853 & Murphy, K. R. (2021, July). The Roles of the Magnetopause and Plasma-  
 854 pause in Storm-Time ULF Wave Power Enhancements. *Journal of Geophysical*  
 855 *Research (Space Physics)*, *126*(7), e29337. doi: 10.1029/2021JA029337
- 856 Santolík, O., Gurnett, D. A., Pickett, J. S., Parrot, M., & Cornilleau-Wehrin, N.  
 857 (2003, July). Spatio-temporal structure of storm-time chorus. *J. Geophys.*  
 858 *Res.*, *108*, 1278. doi: 10.1029/2002JA009791
- 859 Schunk, R. W., Scherliess, L., Sojka, J. J., Thompson, D. C., Anderson, D. N.,  
 860 Codrescu, M., ... Howe, B. M. (2004, February). Global Assimilation of  
 861 Ionospheric Measurements (GAIM). *Radio Science*, *39*(1), RS1S02. doi:  
 862 10.1029/2002RS002794
- 863 Shen, Y., Chen, L., Zhang, X.-J., Artemyev, A., Angelopoulos, V., Cully, C. M., ...  
 864 Horne, R. B. (2021, December). Conjugate Observation of Magnetospheric  
 865 Chorus Propagating to the Ionosphere by Ducting. *Geophys. Res. Lett.*,  
 866 *48*(23), e95933. doi: 10.1029/2021GL095933
- 867 Sheng, C., Deng, Y., Zhang, S.-R., Nishimura, Y., & Lyons, L. R. (2020, Febru-  
 868 ary). Relative Contributions of Ion Convection and Particle Precipitation



- 869 to Exciting Large-Scale Traveling Atmospheric and Ionospheric Distur-  
 870 bances. *Journal of Geophysical Research (Space Physics)*, *125*(2), e27342.  
 871 doi: 10.1029/2019JA027342
- 872 Shi, R., Li, W., Ma, Q., Green, A., Kletzing, C. A., Kurth, W. S., . . . Reeves, G. D.  
 873 (2019, February). Properties of Whistler Mode Waves in Earth's Plasmas-  
 874 sphere and Plumes. *Journal of Geophysical Research (Space Physics)*, *124*(2),  
 875 1035-1051. doi: 10.1029/2018JA026041
- 876 Shi, X., Baker, J. B. H., Ruohoniemi, J. M., Hartinger, M. D., Murphy, K. R., Ro-  
 877 driguez, J. V., . . . Angelopoulos, V. (2018, October). Long-Lasting Poloidal  
 878 ULF Waves Observed by Multiple Satellites and High-Latitude SuperDARN  
 879 Radars. *Journal of Geophysical Research (Space Physics)*, *123*(10), 8422-8438.  
 880 doi: 10.1029/2018JA026003
- 881 Shi, X., Zhang, X.-J., Artemyev, A., Angelopoulos, V., Hartinger, M. D., Tsai,  
 882 E., & Wilkins, C. (2022, December). On the Role of ULF Waves in the  
 883 Spatial and Temporal Periodicity of Energetic Electron Precipitation. *Jour-  
 884 nal of Geophysical Research (Space Physics)*, *127*(12), e2022JA030932. doi:  
 885 10.1029/2022JA030932
- 886 Skone, S. (2009, February). Using GPS TEC measurements to detect geomagnetic  
 887 Pc 3 pulsations. *Radio Science*, *44*(19), RS0A27. doi: 10.1029/2008RS004106
- 888 Southwood, D., & Hughes, W. (1983). Theory of hydromagnetic waves in the mag-  
 889 netosphere. *Space Science Reviews*, *35*(4), 301-366.
- 890 Southwood, D. J., & Kivelson, M. G. (1981, Jul). Charged particle behavior in  
 891 low-frequency geomagnetic pulsations 1. Transverse waves. *J. Geophys. Res.*,  
 892 *86*(A7), 5643-5655. doi: 10.1029/JA086iA07p05643
- 893 Spicher, A., Cameron, T., Grono, E. M., Yakymenko, K. N., Buchert, S. C., Clausen,  
 894 L. B. N., . . . Moen, J. I. (2015, January). Observation of polar cap patches  
 895 and calculation of gradient drift instability growth times: A Swarm case study.  
 896 *Geophys. Res. Lett.*, *42*(2), 201-206. doi: 10.1002/2014GL062590
- 897 Spicher, A., Clausen, L. B. N., Miloch, W. J., Lofstad, V., Jin, Y., & Moen, J. I.  
 898 (2017, March). Interhemispheric study of polar cap patch occurrence based on  
 899 Swarm in situ data. *Journal of Geophysical Research (Space Physics)*, *122*(3),  
 900 3837-3851. doi: 10.1002/2016JA023750
- 901 Spogli, L., Alfonsi, L., de Franceschi, G., Romano, V., Aquino, M. H. O., & Dodson,

- 902 A. (2009, September). Climatology of GPS ionospheric scintillations over high  
 903 and mid-latitude European regions. *Annales Geophysicae*, *27*(9), 3429-3437.  
 904 doi: 10.5194/angeo-27-3429-2009
- 905 Streltsov, A. V., & Lotko, W. (2008, May). Coupling between density struc-  
 906 tures, electromagnetic waves and ionospheric feedback in the auroral zone.  
 907 *Journal of Geophysical Research (Space Physics)*, *113*(A5), A05212. doi:  
 908 10.1029/2007JA012594
- 909 Takahashi, K., & Anderson, B. J. (1992, July). Distribution of ULF energy  
 910 ( $f \approx 80$  mHz) in the inner magnetosphere: A statistical analysis of AMPTE  
 911 CCE magnetic field data. *J. Geophys. Res.*, *97*(A7), 10751-10773. doi:  
 912 10.1029/92JA00328
- 913 Themens, D. R., Watson, C., Žagar, N., Vasylykevych, S., Elvidge, S., McCaffrey, A.,  
 914 ... Jayachandran, P. T. (2022, April). Global Propagation of Ionospheric Dis-  
 915 turbances Associated With the 2022 Tonga Volcanic Eruption. *Geophys. Res.*  
 916 *Lett.*, *49*(7), e98158. doi: 10.1029/2022GL098158.1002/essoar.10510350.1
- 917 Tsurutani, B. T., & Smith, E. J. (1974, January). Postmidnight chorus: A substorm  
 918 phenomenon. *J. Geophys. Res.*, *79*, 118-127. doi: 10.1029/JA079i001p00118
- 919 Tsyganenko, N. A. (1995, April). Modeling the Earth's magnetospheric magnetic  
 920 field confined within a realistic magnetopause. *J. Geophys. Res.*, *100*, 5599-  
 921 5612. doi: 10.1029/94JA03193
- 922 Tyler, E., Breneman, A., Cattell, C., Wygant, J., Thaller, S., & Malaspina, D.  
 923 (2019, Mar). Statistical Occurrence and Distribution of High-Amplitude  
 924 Whistler Mode Waves in the Outer Radiation Belt. *Geophys. Res. Lett.*,  
 925 *46*(5), 2328-2336. doi: 10.1029/2019GL082292
- 926 Verkhoglyadova, O. (2024). *Dataset for the paper "Magnetospheric control of*  
 927 *ionospheric TEC perturbations via whistler-mode and ULF waves" paper*  
 928 *to be submitted to AGU Advances*. JPL Open Repository. Retrieved from  
 929 <https://doi.org/10.48577/jpl.LGI5JS> doi: 10.48577/jpl.LGI5JS
- 930 Verkhoglyadova, O., Meng, X., Mannucci, A. J., Shim, J. S., & McGranaghan,  
 931 R. (2020, September). Evaluation of Total Electron Content Prediction  
 932 Using Three Ionosphere-Thermosphere Models. *Space Weather*, *18*(9),  
 933 e2020SW002452. doi: 10.1029/2020SW002452
- 934 Wang, B., Nishimura, Y., Hartinger, M., Sivadas, N., Lyons, L. L., Varney, R. H., &

- 935 Angelopoulos, V. (2020, August). Ionospheric Modulation by Storm Time Pc5  
 936 ULF Pulsations and the Structure Detected by PFISR-THEMIS Conjunction.  
 937 *Geophys. Res. Lett.*, *47*(16), e89060. doi: 10.1029/2020GL089060
- 938 Watson, C., Jayachandran, P. T., & MacDougall, J. W. (2016, May). Characteris-  
 939 tics of GPS TEC variations in the polar cap ionosphere. *Journal of Geophysi-  
 940 cal Research (Space Physics)*, *121*(5), 4748-4768. doi: 10.1002/2015JA022275
- 941 Watson, C., Jayachandran, P. T., Singer, H. J., Redmon, R. J., & Danskin, D.  
 942 (2015, September). Large-amplitude GPS TEC variations associated with  
 943 Pc5-6 magnetic field variations observed on the ground and at geosynchronous  
 944 orbit. *Journal of Geophysical Research (Space Physics)*, *120*(9), 7798-7821.  
 945 doi: 10.1002/2015JA021517
- 946 Watson, C., Jayachandran, P. T., Singer, H. J., Redmon, R. J., & Danskin, D.  
 947 (2016, February). GPS TEC response to Pc4 “giant pulsations”. *Jour-  
 948 nal of Geophysical Research (Space Physics)*, *121*(2), 1722-1735. doi:  
 949 10.1002/2015JA022253
- 950 Watt, C. E. J., Degeling, A. W., Rankin, R., Murphy, K. R., Rae, I. J., & Singer,  
 951 H. J. (2011, October). Ultralow-frequency modulation of whistler-mode wave  
 952 growth. *Journal of Geophysical Research (Space Physics)*, *116*(A10), A10209.  
 953 doi: 10.1029/2011JA016730
- 954 Xia, Z., Chen, L., Dai, L., Claudepierre, S. G., Chan, A. A., Soto-Chavez, A. R.,  
 955 & Reeves, G. D. (2016, September). Modulation of chorus intensity by ULF  
 956 waves deep in the inner magnetosphere. *Geophys. Res. Lett.*, *43*, 9444-9452.  
 957 doi: 10.1002/2016GL070280
- 958 Xia, Z., Chen, L., & Li, W. (2020, November). Statistical Study of Chorus Modula-  
 959 tions by Background Magnetic Field and Plasma Density. *Geophys. Res. Lett.*,  
 960 *47*(22), e89344. doi: 10.1029/2020GL089344
- 961 Xiong, C., Park, J., Lühr, H., Stolle, C., & Ma, S. Y. (2010, September). Compar-  
 962 ing plasma bubble occurrence rates at CHAMP and GRACE altitudes during  
 963 high and low solar activity. *Annales Geophysicae*, *28*(9), 1647-1658. doi:  
 964 10.5194/angeo-28-1647-2010
- 965 Yeh, K. C., & Liu, C. H. (1982, April). Radio wave scintillations in the ionosphere.  
 966 *IEEE Proceedings*, *70*, 324-360.
- 967 Yeoman, T. K., James, M., Mager, P. N., & Klimushkin, D. Y. (2012, June). Super-

- 968 DARN observations of high-m ULF waves with curved phase fronts and their  
 969 interpretation in terms of transverse resonator theory. *Journal of Geophysical*  
 970 *Research (Space Physics)*, 117(A6), A06231. doi: 10.1029/2012JA017668
- 971 Yizengaw, E., Moldwin, M. B., Komjathy, A., & Mannucci, A. J. (2006, February).  
 972 Unusual topside ionospheric density response to the November 2003 super-  
 973 storm. *Journal of Geophysical Research (Space Physics)*, 111(A2), A02308.  
 974 doi: 10.1029/2005JA011433
- 975 Yizengaw, E., Zesta, E., Moldwin, M. B., Magoun, M., Tripathi, N. K., Surus-  
 976 savadee, C., & Bamba, Z. (2018, June). ULF Wave-Associated Density  
 977 Irregularities and Scintillation at the Equator. *Geophys. Res. Lett.*, 45(11),  
 978 5290-5298. doi: 10.1029/2018GL078163
- 979 Zettergren, M. D., & Snively, J. B. (2015, September). Ionospheric response  
 980 to infrasonic-acoustic waves generated by natural hazard events. *Jour-*  
 981 *nal of Geophysical Research (Space Physics)*, 120(9), 8002-8024. doi:  
 982 10.1002/2015JA021116
- 983 Zhai, C., Shi, X., Wang, W., Hartinger, M. D., Yao, Y., Peng, W., . . . Baker,  
 984 J. B. H. (2021, July). Characterization of High-m ULF Wave Signa-  
 985 tures in GPS TEC Data. *Geophys. Res. Lett.*, 48(14), e94282. doi:  
 986 10.1029/2021GL094282
- 987 Zhang, S.-R., Vierinen, J., Aa, E., Goncharenko, L. P., Erickson, P. J., Rideout,  
 988 W., . . . Spicher, A. (2022, March). 2022 Tonga Volcanic Eruption Induced  
 989 Global Propagation of Ionospheric Disturbances via Lamb Waves. *Frontiers in*  
 990 *Astronomy and Space Sciences*, 9, 871275. doi: 10.3389/fspas.2022.871275
- 991 Zhang, X. J., Angelopoulos, V., Artemyev, A. V., Hartinger, M. D., & Bortnik, J.  
 992 (2020, October). Modulation of Whistler Waves by Ultra-Low-Frequency Per-  
 993 turbations: The Importance of Magnetopause Location. *Journal of Geophysical*  
 994 *Research (Space Physics)*, 125(10), e28334. doi: 10.1029/2020JA028334
- 995 Zhang, X.-J., Chen, L., Artemyev, A. V., Angelopoulos, V., & Liu, X. (2019,  
 996 November). Periodic Excitation of Chorus and ECH Waves Modulated by  
 997 Ultralow Frequency Compressions. *Journal of Geophysical Research (Space*  
 998 *Physics)*, 124(11), 8535-8550. doi: 10.1029/2019JA027201
- 999 Zong, Q., Rankin, R., & Zhou, X. (2017, Dec). The interaction of ultra-low-  
 1000 frequency pc3-5 waves with charged particles in Earth's magnetosphere. *Re-*

1001            *views of Modern Plasma Physics*, 1(1), 10. doi: 10.1007/s41614-017-0011-4  
1002        Zou, S., Ridley, A., Jia, X., Boyd, E., Nicolls, M., Coster, A., . . . Ruohoniemi, J. M.  
1003            (2017, February).     PFISR observation of intense ion upflow fluxes associated  
1004            with an SED during the 1 June 2013 geomagnetic storm. *Journal of Geophys-*  
1005            *ical Research (Space Physics)*, 122(2), 2589-2604. doi: 10.1002/2016JA023697

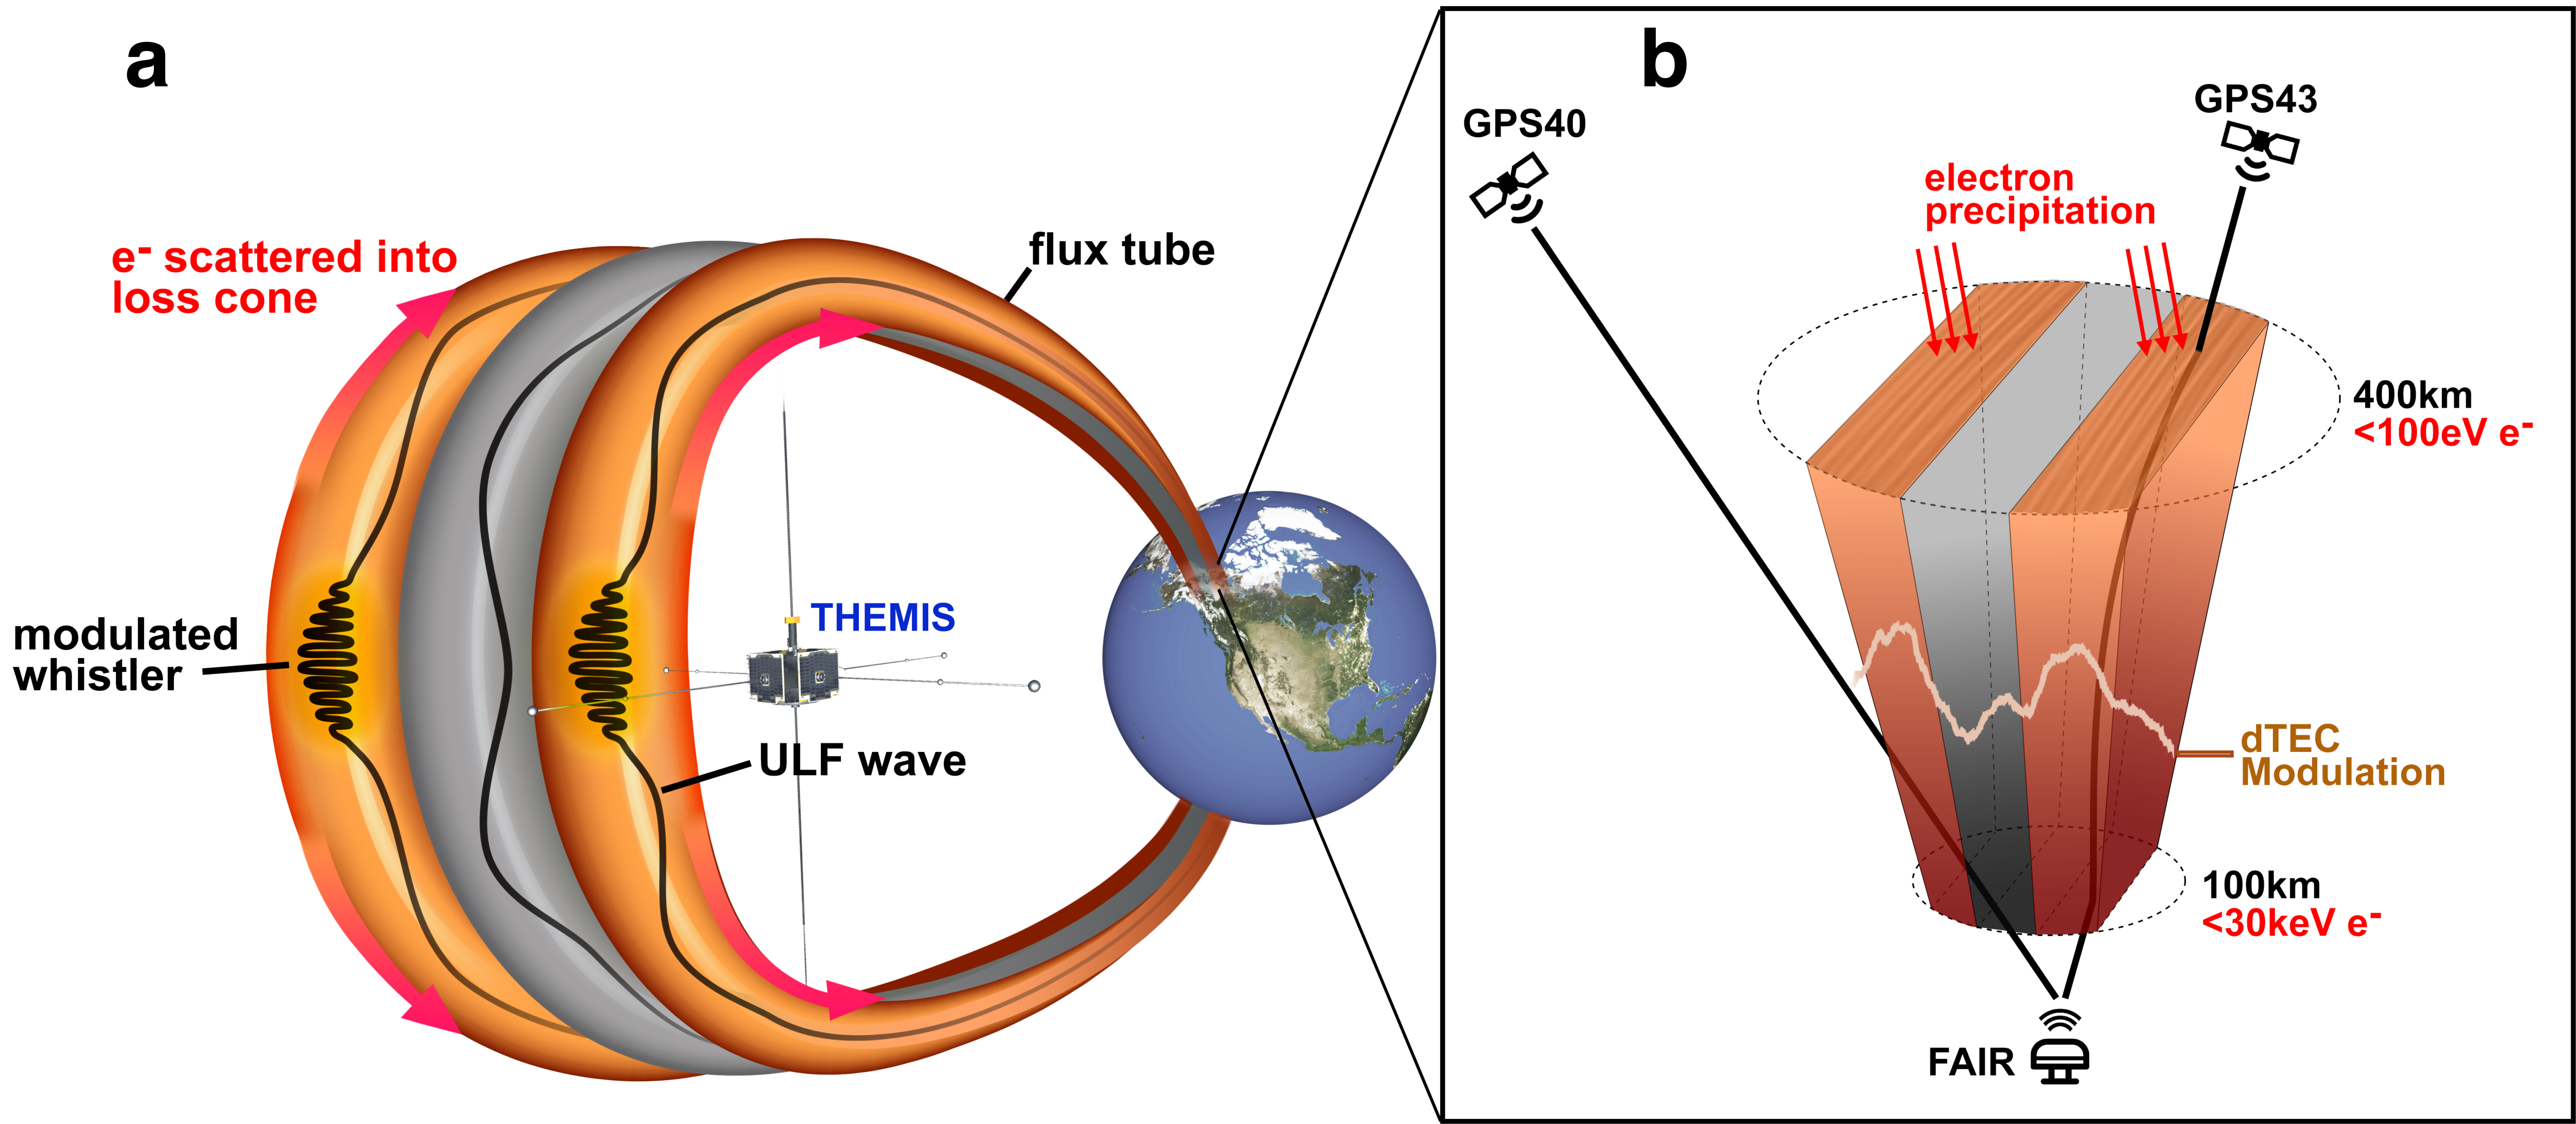

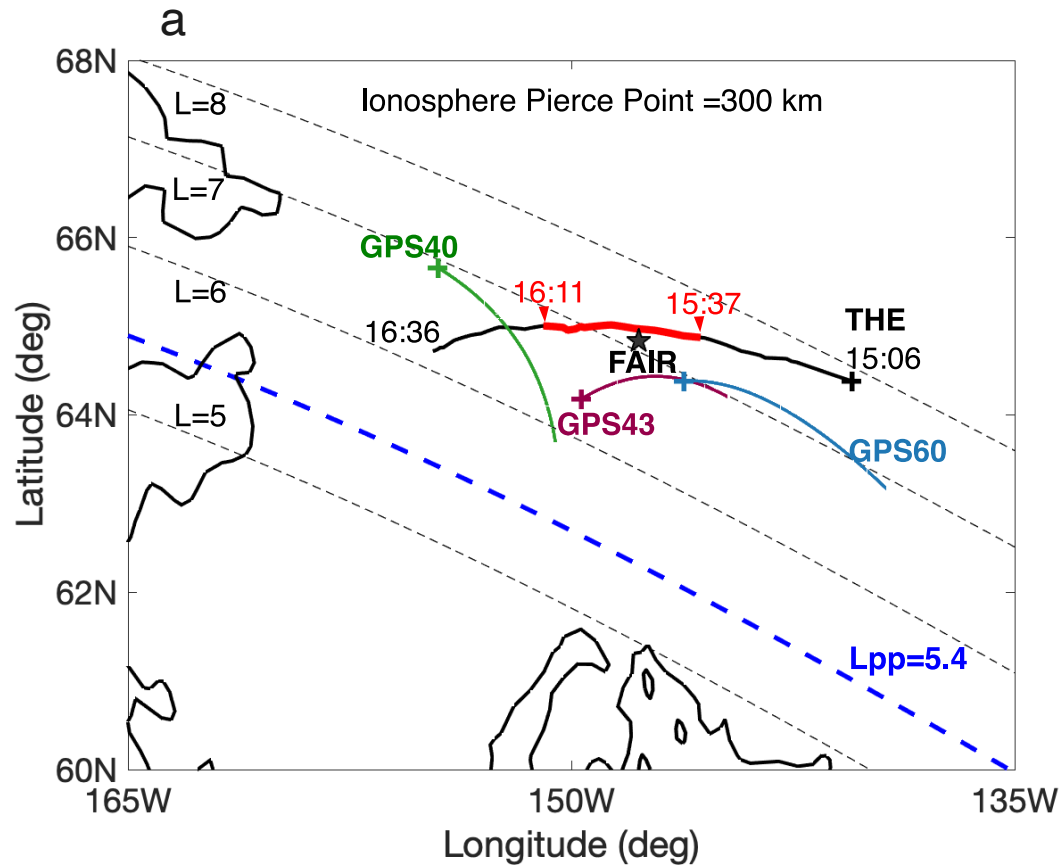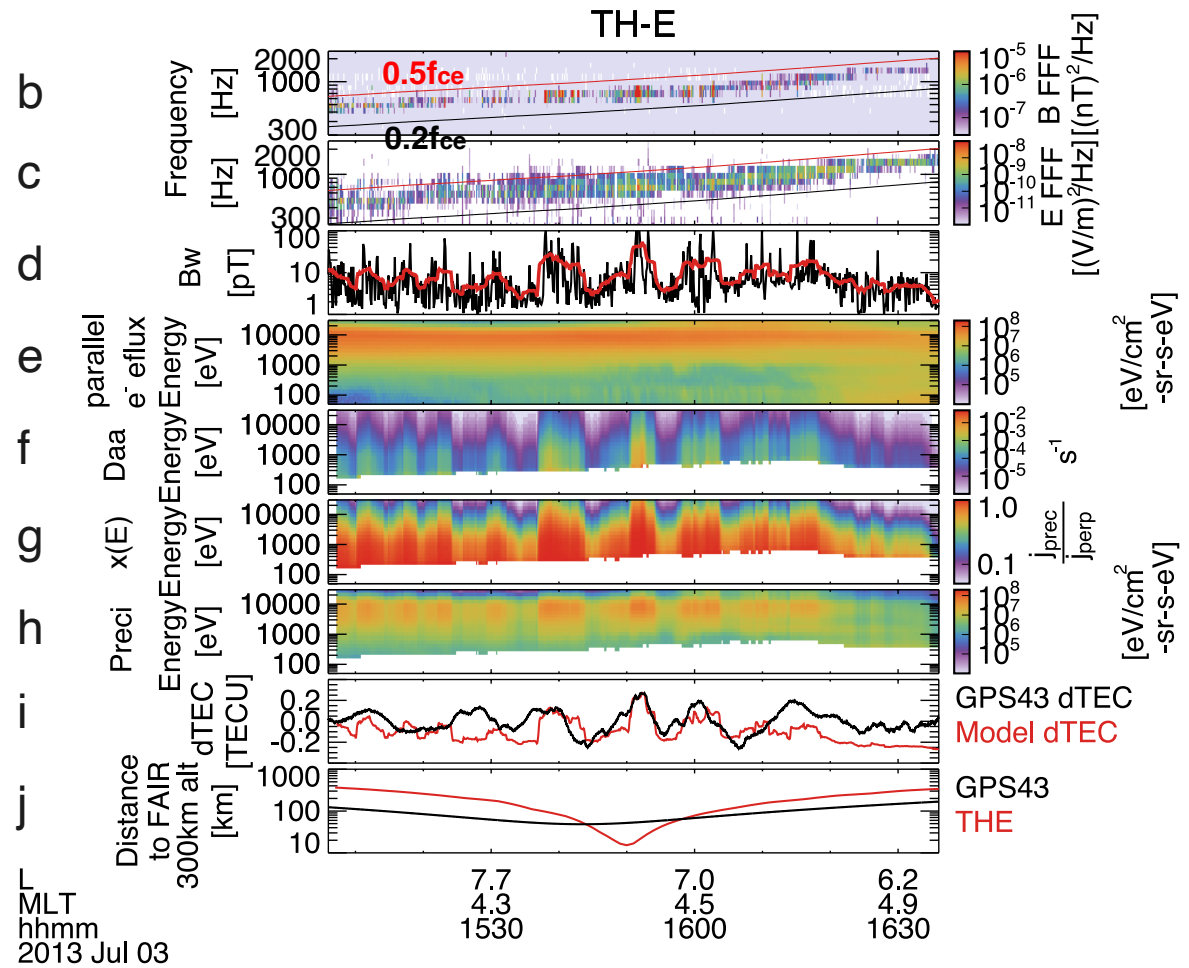

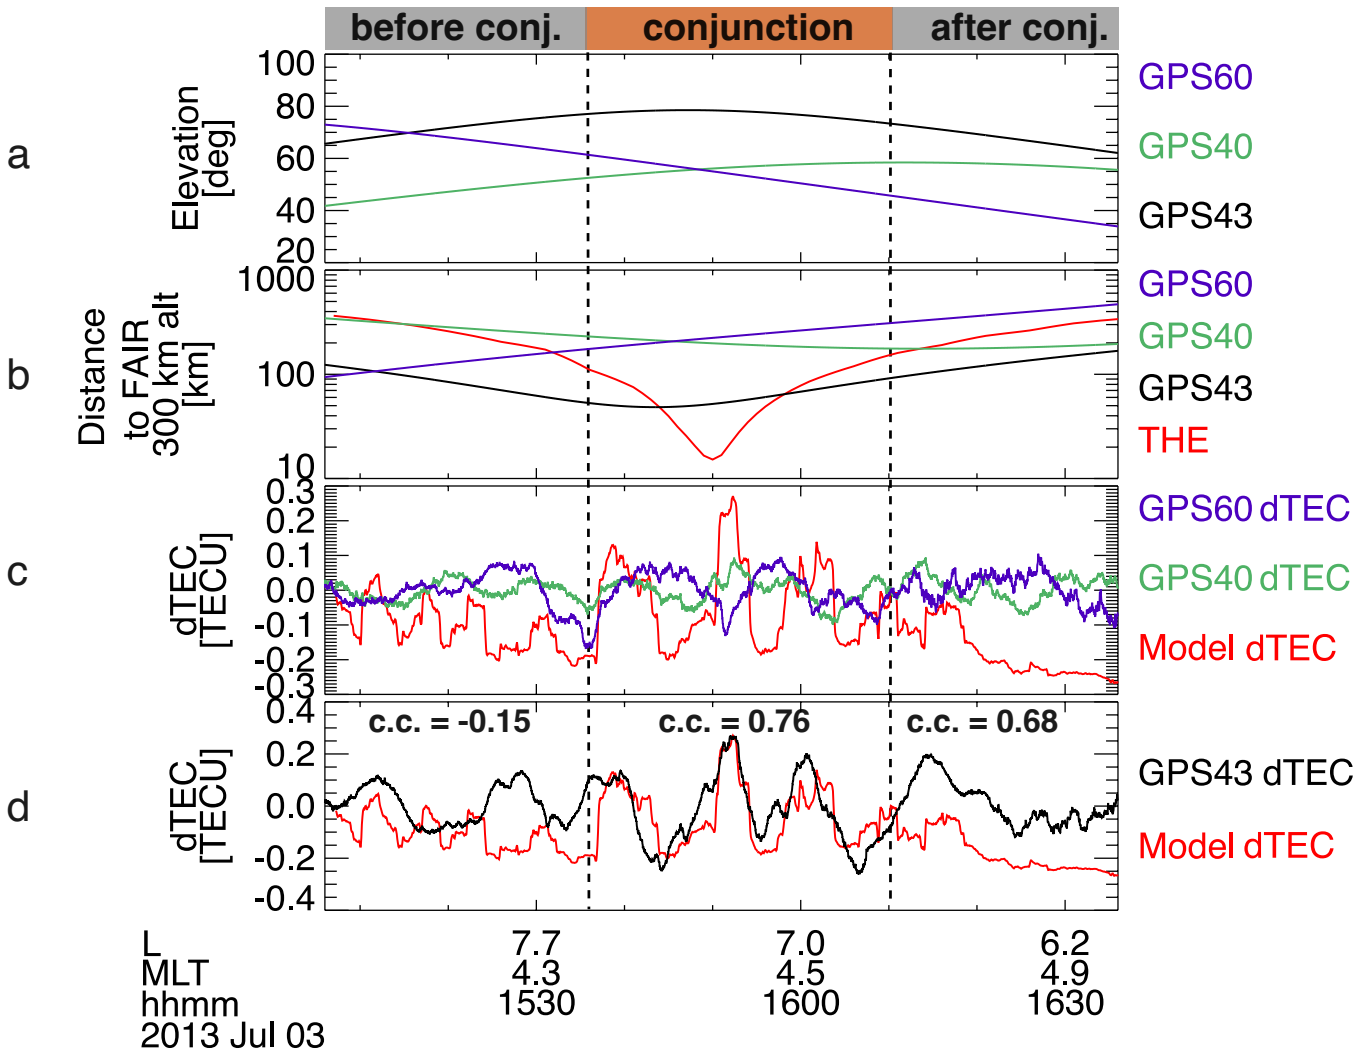



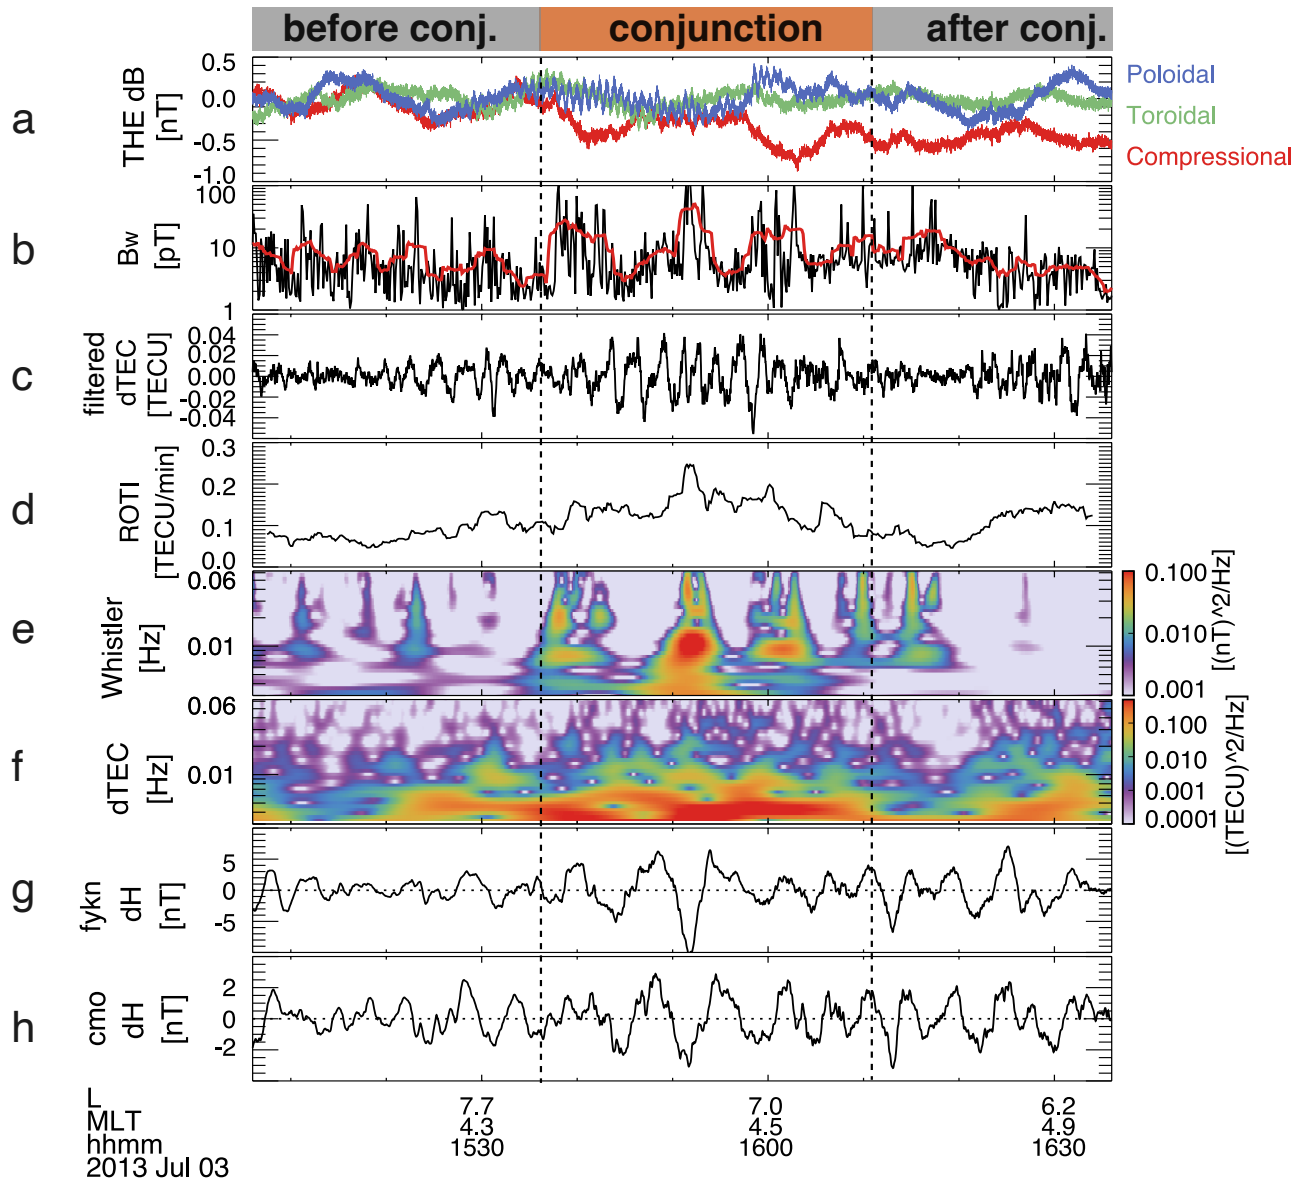

### Comparison of dTEC and Whistler spectra

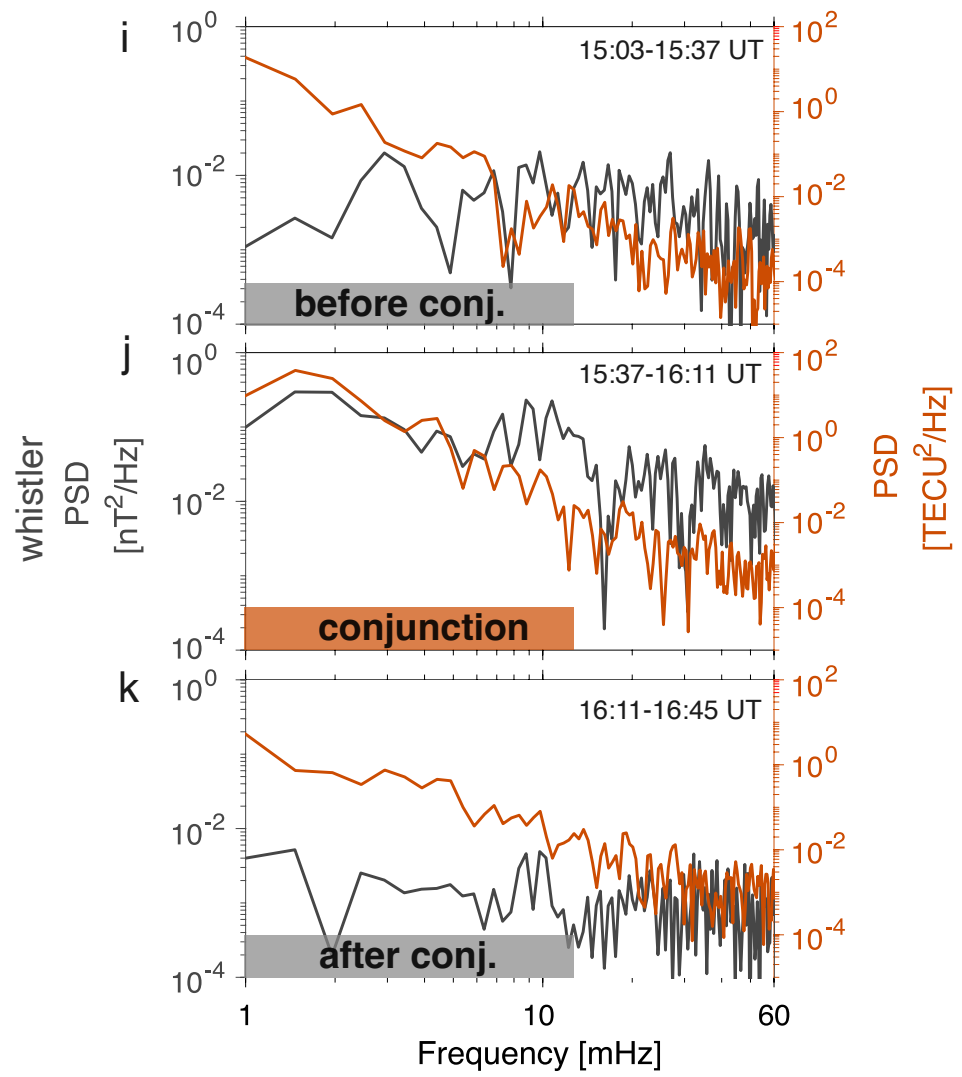

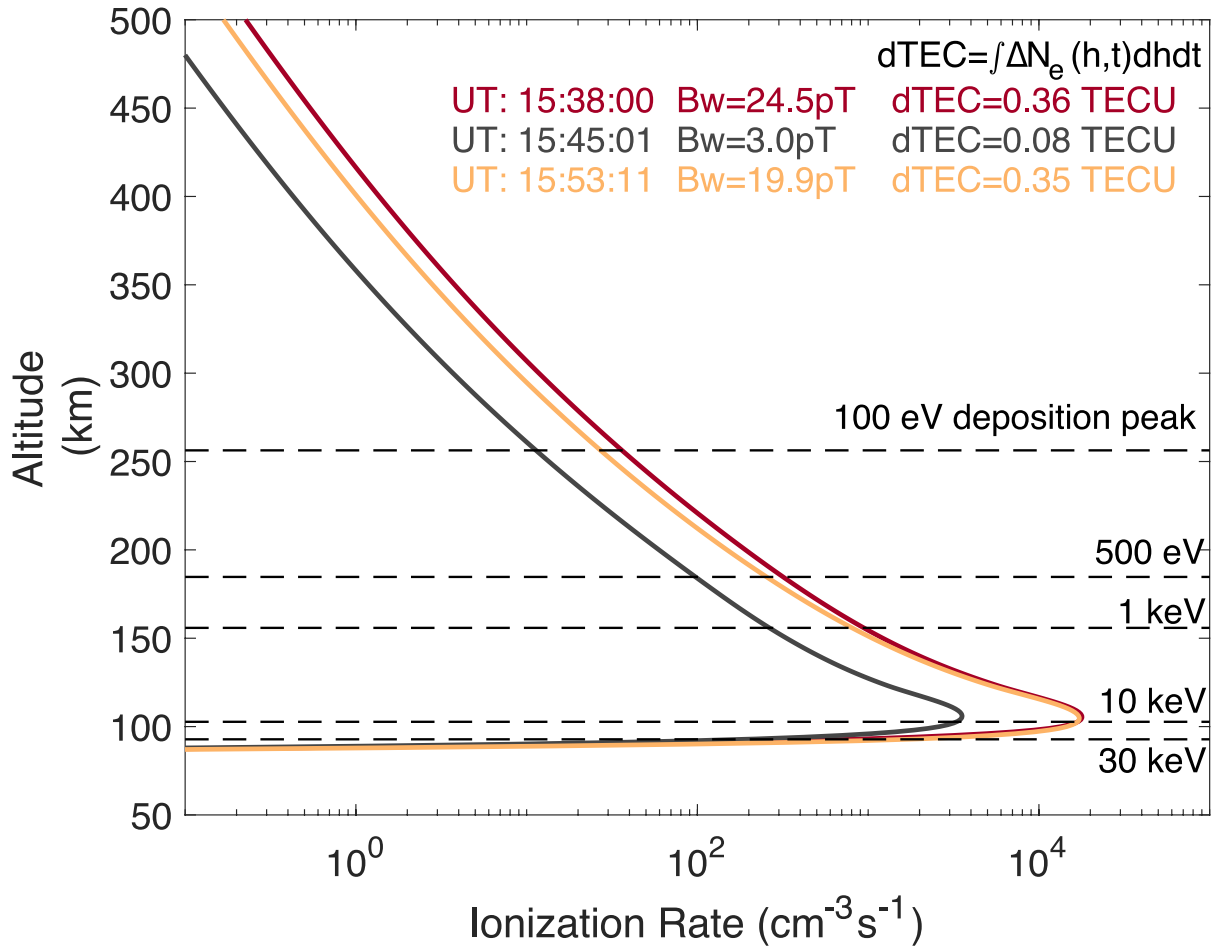

Supplement: AGA2-5-0-s004.pdf [file AGA2-5-0-s004.pdf]
