# Supplementary material for: Magnetospheric Control of Ionospheric TEC Perturbations via Whistler‐Mode and ULF Waves
Source: PubMed Central journal article supplement (PMC11600791; doi:10.1029/2024av001302), 2024-11-25
Supplement: AGA2-5-0-s008.pdf [file AGA2-5-0-s008.pdf]

1                   **Magnetospheric control of ionospheric TEC**  
2                   **perturbations via whistler-mode and ULF waves**

3                   **Yangyang Shen<sup>1</sup>, Olga P. Verkhoglyadova<sup>2</sup>, Anton Artemyev<sup>1</sup>, Michael D.**  
4                   **Hartinger<sup>3,1</sup>, Vassilis Angelopoulos<sup>1</sup>, Xueling Shi<sup>4</sup>, Ying Zou<sup>5</sup>**

5                   <sup>1</sup>Department of Earth, Planetary, and Space Sciences, University of California, Los Angeles, CA, USA

6                   <sup>2</sup>Jet Propulsion Laboratory, California Institute of Technology, Pasadena, CA, USA

7                   <sup>3</sup>Space Science Institute, Center for Space Plasma Physics, Boulder, CO, USA

8                   <sup>4</sup>Department of Electrical and Computer Engineering, Virginia Tech, Blacksburg, VA, USA

9                   <sup>5</sup>Johns Hopkins University Applied Physics Laboratory, Laurel, MD, USA

10                   **Key Points:**

- 11                   • Space-ground conjugate observations point to magnetospheric whistler-mode waves  
12                   as the driver of ionospheric TEC perturbations (dTEC)
- 13                   • The amplitude spectra of dTEC and whistlers are consistent and the cross-correlation  
14                   between modeled and observed dTEC reaches 0.8
- 15                   • Whistler-mode wave amplitudes and dTEC are modulated by ULF waves, which  
16                   exhibit concurrent compressional and poloidal mode variations

---

Corresponding author: Yangyang Shen, [yshen@epss.ucla.edu](mailto:yshen@epss.ucla.edu)

**Abstract**

Total electron content (TEC) in the ionosphere is vital for space weather applications, including monitoring Global Navigation Satellite Systems (GNSS) scintillations and detecting natural hazards, making comprehensive understanding, modeling, and forecasting of TEC perturbations critical for modern society. While modulations of TEC perturbations (dTEC) in the auroral region have been observed to be associated with ultra-low-frequency (ULF) waves, their driving mechanisms remain unclear. Using fortuitously timed and positioned conjugate observations from the THEMIS spacecraft and a GPS receiver at Fairbanks, Alaska, we provide direct evidence that dTEC modulations are driven by magnetospheric precipitation due to electron scattering into the loss cone by ULF-modulated whistler-mode waves. Peak-to-peak dTEC amplitudes reached  $\sim 0.5$  TECU with modulations spanning scales of  $\sim 5$ –80 km. The cross-correlation between modeled and observed dTEC reached  $\sim 0.8$  during the conjugacy period but decreased outside of it. The amplitude spectra of whistler-mode waves and dTEC also matched closely from 1 MHz to tens of MHz during the conjugacy period but diverged outside of it. Our findings offer crucial insights that could improve physics-based TEC modeling and ultimately enhance TEC forecast capabilities.

**Plain Language Summary**

Radio signals experience group delay and phase advance as they transit the ionosphere filled with free electrons. The total number of these electrons along the raypath from the satellite to a receiver defines the total electron content (TEC) of the ionosphere. Small-scale number density irregularities or TEC perturbations may be associated with rapid phase and amplitude fluctuations that cause GNSS signal flickering or scintillations. Scintillations degrade positioning accuracy, disrupt navigation and communication, and lead to signal reception failures. Thus, precise understanding, modeling, and forecasting of TEC perturbations (dTEC) is vital for space weather monitoring and GNSS scintillation prediction. In this study, we analyze fortuitously conjugate observations of ionospheric dTEC from a ground-based GPS receiver and magnetospheric very-low-frequency (VLF) whistler-mode waves from the THEMIS spacecraft, which were optimally aligned in time and space. We find consistent amplitude spectra of dTEC and whistler-mode waves during conjunction, as well as a good cross-correlation ( $\sim 0.8$ ) between observed and modeled dTEC, pointing to whistler-mode waves as the driver of the observed ionospheric

dTEC. The dTEC and whistler-mode wave amplitudes were modulated by ultra-low-frequency (ULF) waves. Our findings offer crucial insights that could ultimately enhance forecast capabilities of auroral TEC models.

## 1 Introduction

One of the first observed space weather phenomena was phase and amplitude fluctuations of radio signals traversing the inhomogeneous ionosphere (Hey et al., 1946). Rapid or small-scale fluctuations can cause signal scintillations of the Global Navigation Satellite Systems (GNSS), degrading positioning accuracy, disrupting navigation and communication, and leading to signal reception failures or loss of lock (Yeh & Liu, 1982; Kintner et al., 2007). The ionospheric signal errors, if caused by refractive effects, can be mitigated by using dual-frequency reception to navigate the dispersive ionosphere and compensating for differential phase delays in the calculated total electron content (TEC) (Mannucci et al., 1998; Ciraolo et al., 2007; McCaffrey & Jayachandran, 2017). The rate of TEC changes serves as an indicator for predicting GNSS scintillations (Pi et al., 1997; Makarevich et al., 2021). Furthermore, relative TEC perturbations have been used to monitor natural hazards, such as tsunamis, earthquakes, explosions, and volcanic eruptions (Komjathy et al., 2016; Astafyeva, 2019). Consequently, precise understanding, modeling, and forecasting of ionospheric TEC perturbations is critical for modern society (Kintner et al., 2007; Jakowski et al., 2007, 2011).

Strong small-scale ( $< \sim 100$  km) TEC perturbations have been observed across both low and high latitudes due to a multitude of mechanisms and drivers involved (Pi et al., 1997; Basu et al., 2002; Kintner et al., 2007; Moen et al., 2013; Pilipenko et al., 2014; Jin et al., 2015; Prikryl et al., 2015; Watson, Jayachandran, Singer, et al., 2016; Fæhn Follestad et al., 2020). Near equatorial latitudes, the most intense ionospheric TEC perturbations and GPS scintillations result from irregularities of plasma bubbles or equatorial spread  $F$ , driven by the Rayleigh-Taylor instability due to lower atmosphere-ionosphere coupling processes (C.-S. Huang & Kelley, 1996; Kelley, 2009; Xiong et al., 2010; Aa et al., 2020; Jin et al., 2020). At higher latitudes, TEC perturbations are caused by plasma irregularities in the cusp and polar cap regions, ranging from a few meters to hundreds of kilometers and associated with solar wind-magnetosphere-ionosphere coupling processes (e.g., Basu et al., 1990; Moen et al., 2013; Spicher et al., 2017). These polar cap irregularities, or density patches, emerge from complex dynamics involving EUV radi-

81 ation, convection, cusp precipitation, field-aligned currents, and various plasma insta-  
82 bilities (Kintner et al., 2007; Moen et al., 2013; Fæhn Follestad et al., 2020).

83 TEC perturbations have also been frequently observed in the auroral region, where  
84 structured particle precipitation prevails (Basu et al., 1983; Coker et al., 1995; Newell  
85 et al., 2009; Nishimura et al., 2010; Chaston et al., 2003; Watson et al., 2011; Watson,  
86 Jayachandran, Singer, et al., 2016; Kasahara et al., 2018; Liang et al., 2019; Shen et al.,  
87 2020; Nishimura et al., 2023). This auroral precipitation, often accompanied by plasma  
88 flow shears, can induce plasma instabilities and density gradients on scales down to the  
89 first Fresnel (diffractive) zone of hundreds of meters (Fejer & Kelley, 1980; Keskinen &  
90 Ossakow, 1983; Tsunoda, 1988; Semeter et al., 2017). Statistical studies have showed that  
91 strong TEC perturbations and GPS phase scintillations were closely collocated in the  
92 auroral region (e.g., Spogli et al., 2009; Jin et al., 2015; Prikryl et al., 2015; Makarevich  
93 et al., 2021).

94 Previous studies have identified modulations of TEC perturbations near the au-  
95 roral region associated with ultra-low-frequency (ULF) waves (Davies & Hartmann, 1976;  
96 Okuzawa & Davies, 1981; Skone, 2009; Pilipenko et al., 2014; Watson et al., 2015; Wat-  
97 son, Jayachandran, Singer, et al., 2016; Zhai et al., 2021). Skone (2009) noted that av-  
98 erage power of magnetic and TEC perturbations in the Pc3 band ( $\sim 0.02\text{--}0.1$  Hz) dis-  
99 played similar temporal variations. Pilipenko et al. (2014) observed a high coherence ( $\sim 0.9$ )  
100 between TEC perturbations and global Pc5 pulsations in a few millihertz during a ge-  
101 omagnetic storm. High coherence and significant common power between TEC pertur-  
102 bations and ULF radial magnetic field variations in the Pc4 band were also reported by  
103 Watson, Jayachandran, Singer, et al. (2016). Despite proposals for various direct TEC  
104 modulation mechanisms by ULF waves (Pilipenko et al., 2014), no mechanism has yet  
105 been conclusively established.

106 Combining spacecraft and ground-based radar observations, Wang et al. (2020) re-  
107 ported a storm-time event where duskside ionospheric density was modulated by ULF  
108 waves in the Pc5 range. Density inversion suggests that the Pc5 pulsations modulated  
109 precipitating electrons over an energy range of  $\sim 1\text{--}500$  keV and an altitude range of  $\sim 80\text{--}$   
110  $200$  km. The authors postulated that these precipitation and density perturbations are  
111 likely due to electron scattered into the loss cone by ULF-modulated very-low-frequency  
112 (VLF) whistler-mode waves.

113 Numerous observations and models demonstrate that ULF waves coexist with and  
114 modulate whistler-mode chorus waves (Coroniti & Kennel, 1970; W. Li, Thorne, et al.,  
115 2011; W. Li, Bortnik, Thorne, Nishimura, et al., 2011; Watt et al., 2011; Jaynes et al.,  
116 2015; Xia et al., 2016, 2020; Zhang et al., 2019, 2020; X. Shi et al., 2022; L. Li et al., 2022,  
117 2023). The modulation of the whistler-mode wave growth is potentially caused by compression-  
118 induced ambient thermal or resonant hot electron density variations (W. Li, Bortnik, Thorne,  
119 Nishimura, et al., 2011; Xia et al., 2016, 2020; Zhang et al., 2019, 2020), resonant elec-  
120 tron anisotropy variations (W. Li, Thorne, et al., 2011; Watt et al., 2011), and nonlin-  
121 ear effects from periodic magnetic field configuration variations (L. Li et al., 2022, 2023).  
122 The periodic excitation of whistler-mode waves at the ULF wave frequency leads to pe-  
123 riodic electron precipitation, which drives pulsating auroras (e.g., Miyoshi et al., 2010;  
124 Nishimura et al., 2010; Jaynes et al., 2015) and may account for many previously reported  
125 dTEC modulations at ULF frequencies (Pilipenko et al., 2014; Watson, Jayachandran,  
126 Singer, et al., 2016; Zhai et al., 2021).

127 However, it is challenging to establish a direct link between magnetospheric drivers  
128 and ionospheric TEC perturbations during ULF modulation events due to several fac-  
129 tors: (1) the path-integrated nature of TEC perturbations, which strongly depend on  
130 the satellite-to-receiver raypath elevation (e.g., Jakowski et al., 1996; Komjathy, 1997),  
131 (2) inherent phase shifts due to complex propagation and modulation effects (Watson  
132 et al., 2015), particularly when conjugate observations are misaligned or not synchro-  
133 nized, and (3) the dynamic and turbulent nature of the auroral ionosphere (Kelley, 2009).  
134 Direct evidence linking TEC perturbations to magnetospheric drivers is yet to be dis-  
135 covered.

136 In this study, fortuitously conjugate observations from the THEMIS spacecraft and  
137 the GPS receiver at Fairbanks, Alaska (FAIR) allow us to identify the driver of GPS TEC  
138 perturbations as magnetospheric electron precipitation induced by ULF-modulated whistler-  
139 mode waves. Figure 1 illustrates the physical picture emerging from our conjugate mag-  
140 netospheric and ionospheric observations of ULF waves, modulated whistler-mode waves,  
141 electron precipitation, and TEC perturbations. These results provide better specifica-  
142 tions of high-latitude drivers for physics-based TEC modeling (Ridley et al., 2006; Zetter-  
143 gren & Snively, 2015; Meng et al., 2016, 2020; Sheng et al., 2020; Verkhoglyadova et al.,  
144 2020; Huba & Drob, 2017) and enhance forecasting capabilities by incorporating the ef-  
145 fects of magnetospheric wave-driven electron precipitation.

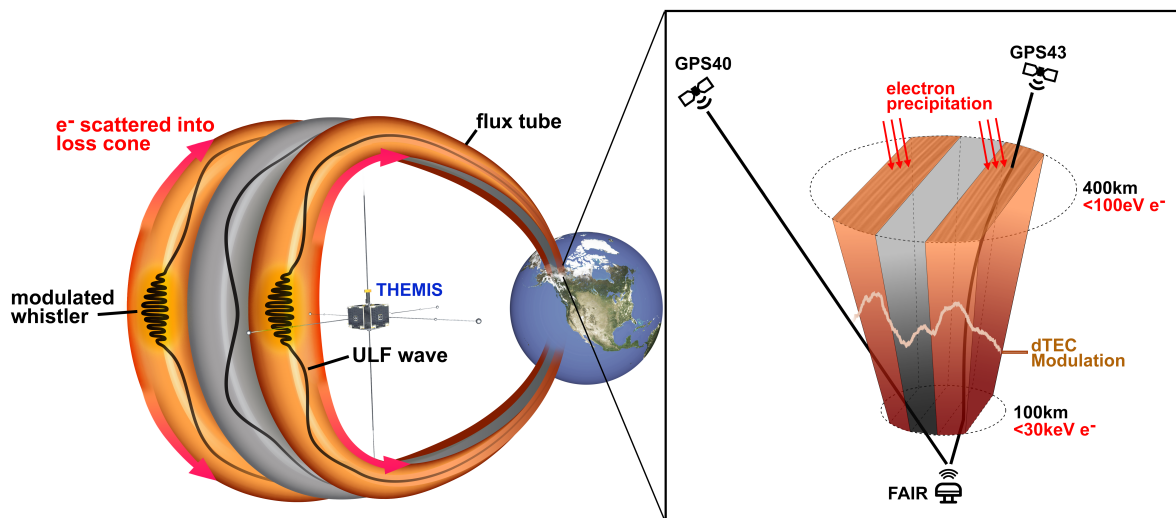

**Figure 1.** Schematic from THEMIS and FAIR observations of (a) modulation of magnetospheric precipitation due to electron scattering into the loss cone by ULF-modulated whistler-mode waves near the magnetic equator; and (b) the modulated electron precipitation has energies of  $\sim 0.1\text{--}30$  keV, depositing their energies at altitudes between  $\sim 100\text{--}400$  km, and inducing modulated impact ionization and TEC perturbations (dTEC) having amplitudes as large as  $\sim 0.5$  TECU and spanning scales of  $\sim 5\text{--}80$  km.

146 In what follows, Section 2 describes datasets and models employed to study whistler-  
147 driven precipitation and resulting TEC perturbations. Section 3 presents a detailed anal-  
148 ysis and cross-correlation between observed and modeled TEC perturbations. Section  
149 4 discusses the geophysical implications and applications of our results, which are fol-  
150 lowed by our main conclusions.

## 151 **2 Data and Methodology**

152 We derive 1-s vertical TEC (VTEC) measurements from phase and pseudorange  
153 data collected by the GPS receiver at Fairbanks, Alaska (FAIR) during 15:06–16:36 UT  
154 on July 3, 2013, processed at Jet Propulsion Laboratory using the GipsyX and Global  
155 Ionospheric Mapping (GIM) software (Komjathy et al., 2005; Bertiger et al., 2020). Phase-  
156 based TEC measurements are leveled using pseudorange delays for each phase-connected  
157 data collection. We focus on links between FAIR and GPS satellites with pseudo ran-  
158 dom noise (PRN) numbers 40, 43, and 60, referred to as GPS40, GPS43, and GPS60,  
159 whose ionospheric pierce points (IPP) at 450 km altitude are within 300 km proximity  
160 to FAIR, or IPPs at 150 km are within 100 km proximity to FAIR. The obtained TEC  
161 is expressed in TEC units (TECU), i.e.,  $10^{16}$  electrons/m<sup>2</sup>. The slant TEC is converted  
162 to VTEC using the standard mapping function (e.g., Mannucci et al., 1998). Measure-  
163 ments with elevation angles less than 30° are not considered here. The VTEC data are  
164 then detrended to get TEC perturbations (dTEC) using a fourth-order Butterworth low-  
165 pass filter. We focus on dTEC with wave periods smaller than 25 min. The accuracy of  
166 dTEC based on phase measurements is  $\sim 0.01$ – $0.02$  TECU (e.g., Coster et al., 2013).

167 We use the following datasets from THEMIS-E (Angelopoulos, 2008): electron en-  
168 ergy and pitch-angle distributions measured by the Electrostatic Analyzers (ESA) in-  
169 strument in the energy range of several eV up to 30 keV (McFadden et al., 2008), DC  
170 vector magnetic field at spin resolution ( $\sim 3$  s) measured by the Fluxgate Magnetome-  
171 ters (FGM) (Auster et al., 2008), electric and magnetic field wave spectra within 1 Hz–  
172 4 kHz, measured every  $\sim 8$  s by the Digital Fields Board (DFB), the Electric Field In-  
173 strument (EFI), and the search coil magnetometer (SCM) (Le Contel et al., 2008; Bon-  
174 nell et al., 2008; Cully, Ergun, et al., 2008). Background electron densities are inferred  
175 from spacecraft potentials (Bonnell et al., 2008; Nishimura et al., 2013). We also use ground-  
176 based magnetometer measurements every 1 s from the College (CMO) site operated by

177 the United States Geological Survey Geomagnetism Program and from the Fort Yukon  
 178 (FYKN) site operated by the Geophysical Institute at the University of Alaska.

179 THEMIS observations of electron distributions and wave spectra allow us to cal-  
 180 culate the precipitating flux of electrons scattered into the loss cone by whistler-mode  
 181 waves using quasilinear diffusion theory (Kennel & Engelmann, 1966; Lyons, 1974). For  
 182 whistler-mode wave normals  $\theta < 45^\circ$ , we use a validated analytical formula of bounce-  
 183 averaged electron diffusion coefficients from Artemyev et al. (2013). For small pitch an-  
 184 gle  $\alpha_{eq}$  approaching the loss cone  $\alpha_{LC}$ , the first-order cyclotron resonance provides the  
 185 main contribution to the bounce-averaged diffusion rate:

$$\langle D_{\alpha_{eq}\alpha_{eq}} \rangle \simeq \frac{\pi B_w^2 \Omega_{ceq} \omega_m}{4\gamma B_{eq}^2 \Delta\omega (p\epsilon_{meq})^{13/9} T(\alpha_{LC}) \cos^2 \alpha_{LC}} \times \frac{\Delta\lambda_{R,N} (1 + 3 \sin^2 \lambda_R)^{7/12} (1 - \bar{\omega})}{|\gamma\bar{\omega} - 2\gamma\bar{\omega}^2 + 1| |1 - \gamma\bar{\omega}|^{4/9}}, \quad (1)$$

186 with  $B_w$  indicating the wave amplitude,  $\omega_m$  the mean wave frequency,  $\Delta\omega$  the frequency  
 187 width,  $\bar{\omega} = \omega_m/\Omega_{ce}$  the normalized frequency,  $\Omega_{ce}$  and  $\Omega_{ceq}$  the local and equatorial  
 188 electron cyclotron frequency,  $\gamma$  the relativistic factor,  $p$  the electron momentum,  $\epsilon_{meq} =$   
 189  $\Omega_{pe}/\Omega_{ceq} \sqrt{\omega_m/\Omega_{ceq}}$  where  $\Omega_{pe}$  is the plasma frequency,  $T(\alpha_{eq})$  the bounce period,  $\lambda_R$   
 190 the latitude of resonance, and  $\Delta\lambda_{R,N}$  the latitudinal range of resonance (see details in  
 191 Artemyev et al. (2013)). The precipitating differential energy flux within the loss cone  
 192 can be estimated as  $x(E)J(E, \alpha_{LC})$ , where

$$x(E) = 2 \int_0^1 I_0(Z_0\tau) \tau d\tau / I_0(Z_0), \quad (2)$$

193 being the index of loss cone filling,  $J(E, \alpha_{LC})$  is the electron differential energy flux near  
 194 the loss cone,  $I_0$  is the modified Bessel function with an argument  $Z_0 \simeq \alpha_{LC} / \sqrt{\langle D_{\alpha_{eq}\alpha_{eq}} \rangle \cdot \tau_{loss}}$   
 195 (Kennel & Petschek, 1966), and  $\tau_{loss}$  is assumed to be half of the bounce period.

196 With an energy distribution of precipitating electrons within 0.1–30 keV, we es-  
 197 timate the impact ionization rate altitude profile using the parameterization model de-  
 198 veloped by Fang et al. (2010), covering isotropic electron precipitation from 100 eV up  
 199 to 1 MeV. This model, derived through fits to first-principle model results, allows effi-  
 200 cient ionization computation for arbitrary energy spectra. Atmospheric density and scale  
 201 height data were obtained from the NRLMSISE-00 model (Picone et al., 2002). We model  
 202 TEC perturbations resulting from whistler-induced electron precipitation by integrat-  
 203 ing ionization rates over altitude and time, adopting an 8-s integration period to align  
 204 with the temporal resolution of THEMIS wave spectra data. Although our analysis does  
 205 not concern equilibrium densities and omits recombination and convective effects, this



neglect has little impact because we focus on relative TEC perturbations due to short-time precipitation. It takes nearly 60 s for the background ionosphere to relax to an equilibrium density solution for 10-keV precipitation and longer for lower energies (e.g., Kaeppler et al., 2022). Our estimated dTEC also closely match observed dTEC values, underscoring the effectiveness of our modeling approach despite its approximation.

### 3 Results

On July 3, 2013, from 15:06 to 16:36 UT, the THEMIS-E spacecraft flew westward over the FAIR GPS receiver station, coming within  $\sim 20$  km relative to FAIR when mapped to 450 km altitude. This optimally timed and positioned space-ground conjunction offers a unique opportunity to link between magnetospheric and ionospheric processes along the field line. The event occurred at  $L \sim 7$ , outside the plasmapause of  $L_{pp} \sim 5.4$  (based on THEMIS-E densities near 17:00 UT), near the magnetic local time (*MLT*) of 4.5 hr, and during a geomagnetic quiet time with  $Kp \sim 1$  and  $AE \sim 200$  nT. Figure 2a illustrates the trajectories of THEMIS-E and the ionosphere pierce points (IPPs) of GPS40, GPS43, and GPS60 near FAIR, mapped to 450 km altitude. The footprints of THEMIS-E are field-line traced using the Tsyganenko T96 model (Tsyganenko, 1995) but the GPS satellites are mapped using line of sight. Of these GPS satellites, the GPS43 IPPs, moving eastward, were nearest to both the FAIR and THEMIS-E footprints, exhibiting close longitudinal alignment. A notable conjugacy, marked by the bright red segment from 15:37 to 16:11 UT, occurred when the footprints of THEMIS-E and GPS43 IPPs were within  $\sim 100$  km to each other and FAIR (Figure 2j). In Supporting Information, we also present the configuration when the satellites and their IPPs are mapped to an altitude of 150 km. This adjustment does not significantly alter the geometry of our conjunction event, but it does slightly reduce the scale of the satellite footpaths near FAIR.

Figures 2b–2d present THEMIS observations of whistler-mode waves. The observed wave frequencies were in the whistler lower band, spanning  $\sim 0.2$ – $0.5\Omega_{ce}$ , with a mean frequency  $\omega_m \sim 0.35\Omega_{ce}$ , and  $\Delta\omega \sim 0.15\Omega_{ce}$ , where the electron cyclotron frequency  $f_{ce} \sim \Omega_{ce}/2\pi \sim 2.15$  kHz. Figure 2d shows that whistler-mode wave amplitudes  $B_w$  range from several pT to over 100 pT, measured at 8-s cadence (black curve) and smoothed with 2-min moving averages (red curve). Short-term oscillations in  $B_w$  on the order of tens of seconds were observed atop more gradual variations of several minutes. We mainly use smoothed or average  $B_w$  to estimate electron precipitation in the following. Absent

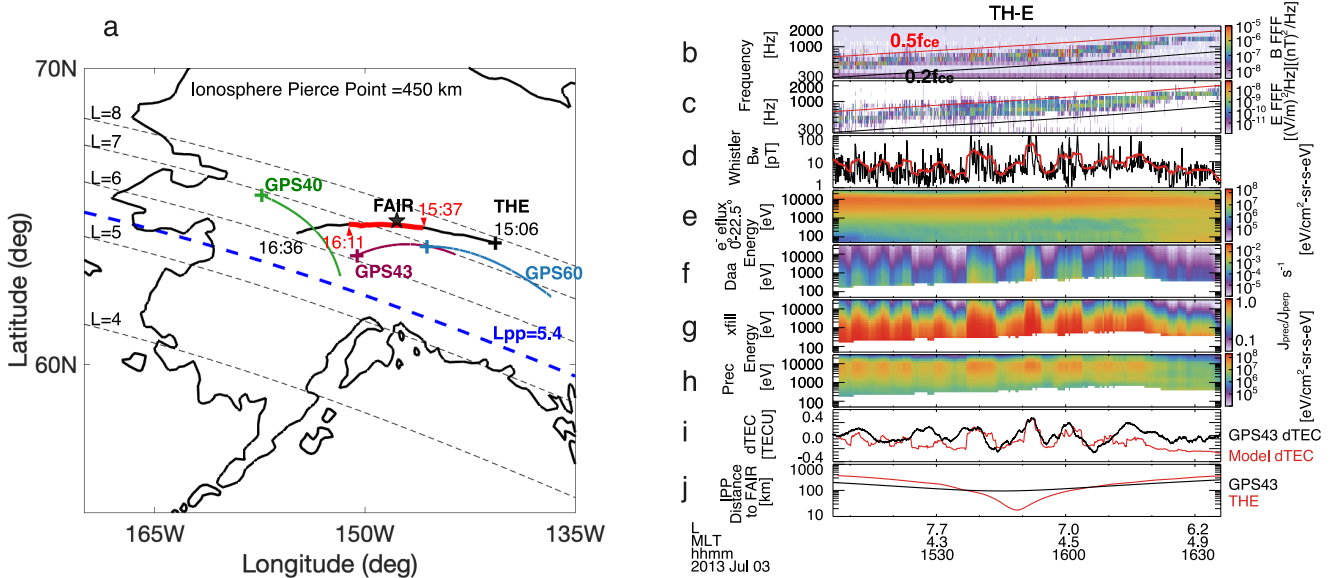

**Figure 2.** (a) Configuration of THEMIS-E (black curve), GPS40, GPS43, and GPS60 satellites (green, purple, and blue curves), and the FAIR receiver (black star) in geographic coordinates, with THEMIS and GPS mapped onto 450 km altitude using T96 field tracing (THEMIS) or line of sight (GPS). The plus symbol indicates the start of the footpath. (b–e) THEMIS-E magnetic field spectrogram, electric field spectrogram, whistler-mode wave amplitudes, and field-aligned ( $0^\circ$ – $22.5^\circ$ ) electron energy spectrogram. (f) Bounce-averaged electron diffusion rates. (g) Index of loss cone filling. (h) Whistler-driven precipitating electron energy spectrogram. (i) Comparison of whistler-driven model dTEC (red curve) and GPS43-observed dTEC (black curve). (j) Great-circle distances between THEMIS-E footpath (red curve) and GPS43 raypath (black curve) at IPP of 450 km relative to the FAIR station.

238 direct waveform data on whistler-mode wave normals for our event, we infer, based on  
 239 the measured  $E/cB$  spectra ( $E/cB \ll 1$ , see Supporting Information) and statistical night-  
 240 side equatorial plasma sheet observations (W. Li, Bortnik, Thorne, & Angelopoulos, 2011;  
 241 Agapitov et al., 2013; Meredith et al., 2021), the presence of quasi-parallel whistlers with  
 242 an assumed Gaussian wave normal width of  $\Delta\theta \sim 30^\circ$  confined within  $\pm 30^\circ$  in latitude.

243 Figures 2e–2h display the measured plasma sheet field-aligned ( $\alpha \sim [0^\circ, 22.5^\circ]$ ) elec-  
 244 trons from 50 eV up to 25 keV, calculated diffusion rates  $\langle D_{\alpha_{eq}\alpha_{eq}} \rangle$ , estimated loss cone  
 245 filling  $x(E)$ , and precipitating electron energy fluxes. Although  $\langle D_{\alpha_{eq}\alpha_{eq}} \rangle$  and  $x(E)$  in-  
 246 crease at lower energies, the precipitating energy fluxes peak between 1–10 keV, exhibit-  
 247 ing similar modulations as seen in the smoothed whistler-mode wave amplitude  $B_w$ . Elec-  
 248 tron precipitation fluxes below  $\sim 200$  eV are absent due to an energy threshold for elec-  
 249 tron cyclotron resonance interaction, with the lower limit primarily determined by the  
 250 ratio  $\Omega_{pe}/\Omega_{ce}$  ( $\sim 3$  in our case).

251 Figure 2i compares modeled (red) and directly measured dTEC (black) from the  
 252 GPS43 signal, revealing a nearly one-to-one phase correlation from 15:37 to 16:11 UT.  
 253 This period of close correlation coincides with the conjunction of THEMIS-E, GPS43,  
 254 and FAIR, where their relative distances were within  $\sim 100$  km (Figure 2j). Outside this  
 255 conjugacy period and further away from the FAIR station, the correlation decreases. Ob-  
 256 served peak-to-peak amplitudes of dTEC reached  $\sim 0.5$  TECU. Note that this particu-  
 257 lar event occurred during quiet conditions; other events during storms may have much  
 258 larger TEC modulation amplitudes (e.g., Watson et al., 2015), though more challeng-  
 259 ing to have such reliable conjunction, especially given uncertainties in magnetic field map-  
 260 ping during storms (e.g., C.-L. Huang et al., 2008).

261 Figure 3 underscores the critical role of observation geometry and timing in detect-  
 262 ing phase correlations between modeled and measured dTEC across three GPS satellites.  
 263 Despite all three satellites having raypath elevation angles  $> 40^\circ$ —reducing the likelihood  
 264 of multi-path effects (e.g., Kintner et al., 2007)—only the GPS43 elevation reached  $80^\circ$   
 265 above the FAIR station zenith (Figure 3a). During the conjugacy period, the IPPs of  
 266 GPS40 and GPS60 were distanced from FAIR by more than 200 km, while GPS43’s IPPs  
 267 remained within 100 km, coming within 20 km at its closest point (Figure 3b). Figures 3c  
 268 and 3d reveal that the modeled dTEC (red curve) aligns poorly with GPS40 and GPS60  
 269 dTEC (blue and magenta curves), but a significant cross-correlation ( $\sim 0.8$ ) emerges with

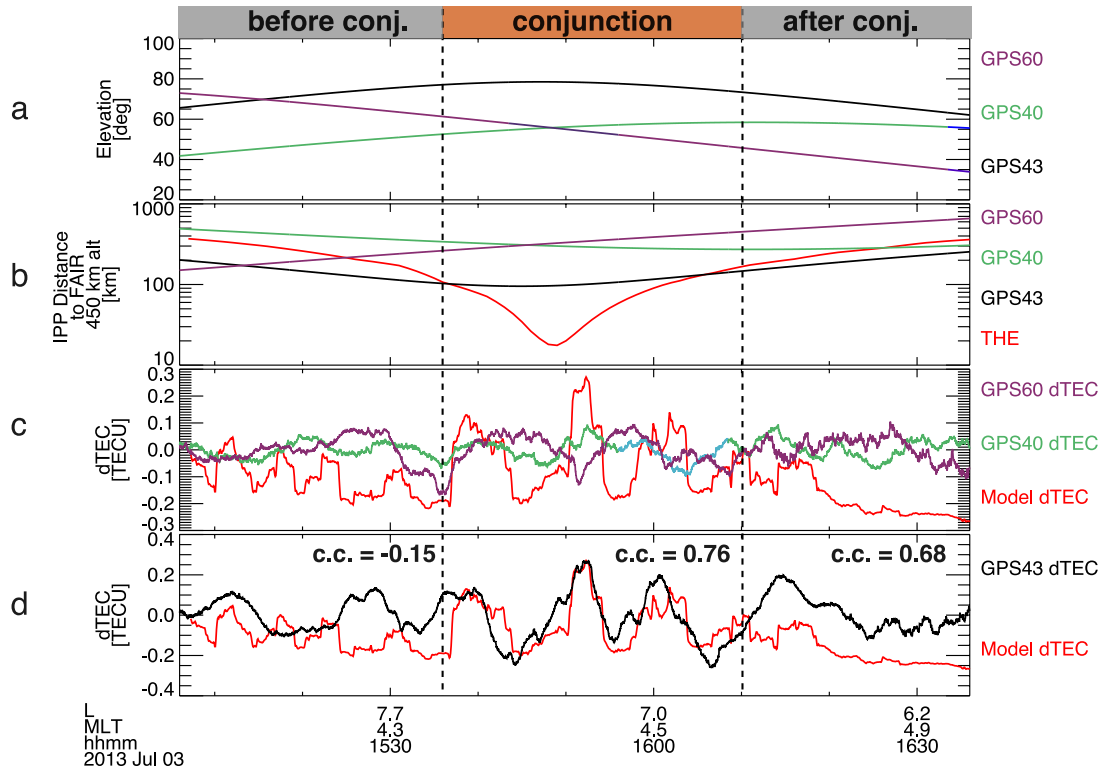

**Figure 3.** (a) Raypath elevation angles of GPS40 (green curve), GPS43 (black curve), and GPS60 (magenta curve). (b) Distances between THEMIS-E footpath and GPS satellite IPPs relative to FAIR, displayed in the same format as Figure 1j. (c) Comparison between whistler-driven model dTEC and observed dTEC from GPS40 and GPS60, which were not in good conjunction with THEMIS or FAIR. (d) Comparison between whistler-driven model dTEC and GPS43-observed dTEC. The cross-correlation coefficients are -0.15, 0.76, and 0.68 during intervals before, during, and after conjunction, respectively.

270 GPS43 dTEC (black) during the conjugacy period. Before and after the conjunction, TEC  
 271 phase shifts reduce the cross-correlation to -0.15 and 0.68, respectively. Given the near-  
 272 parallel longitudinal alignment of GPS43 IPPs and THEMIS-E footprints (Figure 2a),  
 273 the measured dTEC (black) potentially reflects both temporal and spatial/longitudinal  
 274 modulations. These findings suggest that to reliably identify the electron precipitation  
 275 responsible for TEC perturbations requires precise spacecraft spatial alignment, opti-  
 276 mal timing, and high raypath elevations.

277 The modulation of TEC perturbations, electron precipitation, and whistler-mode  
 278 wave amplitudes was linked to ULF wave activities in the Pc3-5 band (1.7 mHz to 100  
 279 mHz). Figure 4a display the magnetic field perturbations measured by THEMIS-E in  
 280 the mean field-aligned (MFA) coordinates, in which the parallel direction ( $\parallel$ , the com-  
 281 pressional component) is determined by 15-minute sliding averages of the magnetic field,  
 282 the azimuthal direction ( $\phi$ , the toroidal component) is along the cross product of  $z$  and  
 283 the spacecraft geocentric position vector, and the radial direction ( $r$ , the poloidal com-  
 284 ponent) completes the triad. Magnetic perturbations are obtained by subtracting the  
 285 15-minute mean field. During the conjunction, THEMIS-E detected both compressional  
 286 Pc5 waves (red curve) and poloidal Pc3-4 waves (blue curve). Figure 4b indicates that  
 287 peaks in whistler-mode wave amplitudes approximately align with troughs of compres-  
 288 sional ULF waves, with fine-scale whistler amplitudes primarily modulated by poloidal  
 289 Pc3-4 waves (See Supporting Information). Strong Pc5 ULF waves were also recorded  
 290 in the  $H$ -component magnetic field perturbations from magnetometers located at CMO  
 291 and FYKN (Figures 4g–4h), displaying a similar pattern but with greater amplitudes  
 292 at FYKN, located slightly north of FAIR. The discrepancy between ground- and space-  
 293 measured Pc5 waves potentially results from the localized nature of THEMIS-E obser-  
 294 vations (X. Shi et al., 2022) and the screening/modification effects of ULF waves travers-  
 295 ing the ionosphere (Hughes & Southwood, 1976; Lysak, 1991; Lessard & Knudsen, 2001;  
 296 X. Shi et al., 2018). These observations imply that the ionospheric TEC perturbations  
 297 were linked to ULF-modulated whistler-mode waves and the associated electron precip-  
 298 itation (e.g., Coroniti & Kennel, 1970; W. Li, Thorne, et al., 2011; Xia et al., 2016; Zhang  
 299 et al., 2020; L. Li et al., 2023).

300 Figures 4b–4c compare small-scale/high-frequency fluctuations of whistler-mode  
 301 wave amplitudes  $B_w$  and dTEC, which was bandpass-filtered within the frequency range  
 302 of 5–200 mHz. The small-scale dTEC fluctuations exhibit similar wave periods to  $B_w$

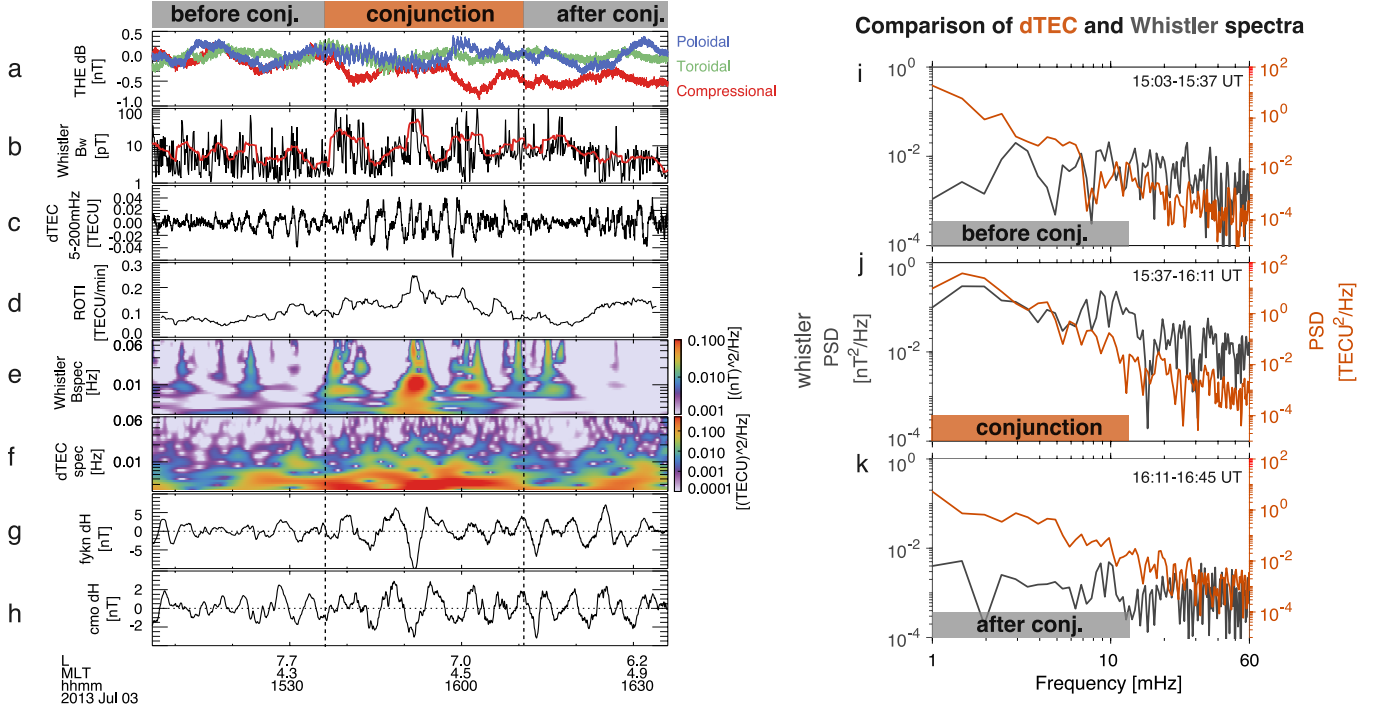

**Figure 4.** (a) THEMIS-E magnetic field perturbations in the mean-field-aligned (MFA) coordinates, exhibiting primarily compressional- (red) and poloidal-mode (blue) variations. (b) THEMIS-E whistler-mode wave amplitudes. The measured amplitudes are shown in black and smoothed in red. (c) dTEC bandpass filtered within 5–200 mHz. (d) The rate of dTEC changes (*ROTI*) from 200-s sliding window ensemble averaging. (e) Wavelet spectrogram of whistler-mode waves. (f) Wavelet spectrogram of GPS43 dTEC. (g) Ground-based magnetic field *H* component perturbations in 1.7–100 mHz from the Fort Yukon station (FYKN). (h) Ground-based magnetic *H* component perturbations in 1.7–100 mHz from the College station (CMO). (i–k) Comparisons of dTEC (orange curves) and whistler-mode wave amplitude fluctuation spectra (gray curves) in 1–60 mHz measured before (i), during (j), and after (k) the conjugacy period.

303 fluctuations, evidently intensifying during the conjugacy period, yet lacking a clear phase  
 304 correlation seen with larger scale perturbations in Figure 3d. Assumed purely spatial,  
 305 small-scale dTEC variations have wavelengths of  $\sim 15\text{--}30$  km at IPPs of 450 km altitude  
 306 (or  $\sim 5\text{--}10$  km at IPPs of 150 km altitude), compared with the larger-scale dTEC wave-  
 307 lengths of  $\sim 80$  km (or  $\sim 25$  km at IPPs of 150 km altitude). When mapped to the mag-  
 308 netosphere, these small-scale dTEC modulations correspond to a magnetospheric source  
 309 region of  $\sim 100\text{--}700$  km, while large-scale dTEC modulations suggest a source region of  
 310  $\sim 500\text{--}2000$  km. These scales align with prior observations of the transverse scale sizes  
 311 of chorus elements and their source regions (Santolík et al., 2003; Agapitov et al., 2017,  
 312 2018), and with the azimuthal wavelengths of high-m poloidal ULF waves (Yeoman et  
 313 al., 2012; X. Shi et al., 2018; Zong et al., 2017). Figure 4d shows the rate of TEC index  
 314 (*ROTI*), i.e., the standard deviation of the rate of TEC (*ROT*) (Pi et al., 1997), where  
 315  $ROT = (dTEC(t+\tau) - dTEC(t))/\tau$  with  $\tau = 10$  s,  $ROTI = \sqrt{\langle ROT^2 \rangle - \langle ROT \rangle^2}$  us-  
 316 ing 200-s sliding averages. Significant increases in *ROTI* were observed within the re-  
 317 gion of whistler-driven TEC perturbations. However, in our case the GPS signal fluc-  
 318 tuations were predominantly refractive, as negligible fluctuations were detected at fre-  
 319 quencies above 0.1 Hz (McCaffrey & Jayachandran, 2017, 2019; Nishimura et al., 2023).

320 Figures 4e–4f compare the wavelet spectrograms of whistler-mode wave  $B_w$  and dTEC,  
 321 displaying concurrent increases in wave power for both in the frequency range of  $\sim 3$  mHz  
 322 up to tens of mHz. Figures 4i–4k present a more detailed amplitude spectra compari-  
 323 son before, during, and after conjunction. Notably, only during the conjunction, whistler-  
 324 mode wave amplitudes and dTEC share similar power spectral density (PSD) distribu-  
 325 tions in the 1– $\sim 30$  mHz range. The peaks in whistler spectra were slightly and consis-  
 326 tently larger than those in dTEC spectra within 3–20 mHz by factors of 1.05–1.2, align-  
 327 ing with expected Doppler shift effects on ionospheric TEC measurements. The Doppler  
 328 shift results from relative motion of GPS raypath (or IPPs with velocities of  $\sim 160$  m/s  
 329 in our case) and propagating TEC structures (typically with velocities of several hun-  
 330 dred m/s) (Watson, Jayachandran, & MacDougall, 2016):  $f_{cor} = f_{obs} \left(1 + \frac{\mathbf{v}_{ipp} \cdot \mathbf{v}_{struct}}{|\mathbf{v}_{struct}|^2}\right)$ ,  
 331 where  $f_{cor}$  is the frequency corrected for relative motion. Watson, Jayachandran, and  
 332 MacDougall (2016) found that 89% of their statistical events required a correction fac-  
 333 tor of 1.2 or less for the Doppler shift, consistent with our observations. The agreement  
 334 between dTEC and whistler amplitude spectra supports that the observed dTEC resulted  
 335 from electron precipitation induced by whistler-mode waves.

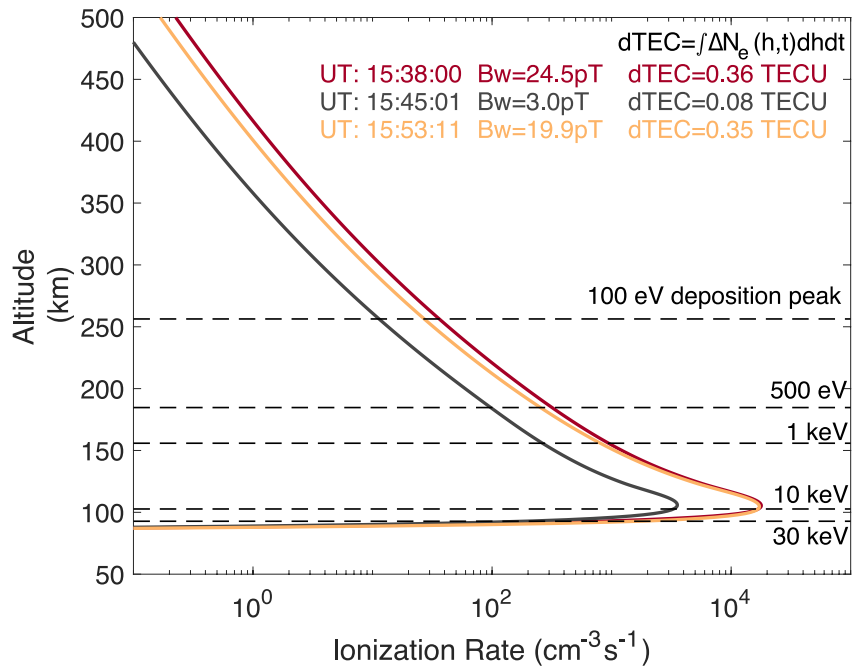

**Figure 5.** Ionization rate altitude profiles calculated at three time stamps of 15:38:00, 15:45:01, and 15:53:11 UT, corresponding to whistler-mode wave amplitudes of  $B_w = 24.5$  pT (red curve), 3.0 pT (gray curve), and 19.9 pT (orange curve). The dTEC were calculated by integrating ionization rates over altitude and time (8s). The dashed lines mark the peak deposition altitudes of 100 eV, 500 eV, 1 keV, 10 keV, and 30 keV precipitating monoenergetic electrons.



336 Figure 5 indicates that the electron precipitation, induced by ULF-modulated whistler-  
337 mode waves, can cause significant increases in ionospheric ionization rate or column den-  
338 sity, leading to TEC perturbations of  $\sim 0.36$  TECU with a moderate whistler amplitude  
339 of  $B_w \sim 25$  pT. Given that large-amplitude whistler-mode waves exceeding several hun-  
340 dred pT frequently occur in the inner magnetosphere (Cattell et al., 2008; Cully, Bon-  
341 nell, & Ergun, 2008; Agapitov et al., 2014; Hartley et al., 2016; R. Shi et al., 2019), we  
342 anticipate even larger TEC perturbations from such whistler activities. We defer a sta-  
343 tistical study including storm time events and the potential connection with scintilla-  
344 tion (e.g., McCaffrey & Jayachandran, 2019; Nishimura et al., 2023) for the future. In  
345 addition, the primary energy range of precipitation spans from  $\sim 100$  eV to  $\sim 30$  keV, con-  
346 tributing to density variations between  $\sim 90$ – $\sim 400$  km (Fang et al., 2010; Katoh et al.,  
347 2023; Berland et al., 2023).

#### 348 4 Discussion

349 Various mechanisms have been proposed that link ULF waves to TEC perturba-  
350 tions and ionospheric disturbances in general (Pilipenko et al., 2014). Although TEC per-  
351 turbations might arise from direct ULF wave effects through convective and divergent  
352 flows, MHD Alfvén-mode waves do not directly alter plasma density. Furthermore, mode-  
353 converted compressional waves, if present due to Hall currents, are evanescent in the iono-  
354 sphere (Lessard & Knudsen, 2001), resulting in minimal TEC perturbations (Pilipenko  
355 et al., 2014). A non-linear "feedback instability" mechanism may modify ULF wave dy-  
356 namics, causing field-aligned current striations and significant bottom-side ionospheric  
357 density cavities and gradients (Lysak, 1991; Streltsov & Lotko, 2008). Additionally, elec-  
358 tron precipitation and Joule heating are important factors to consider in the auroral re-  
359 gion (e.g., Deng & Ridley, 2007; Sheng et al., 2020; Meng et al., 2022).

360 Detecting one-to-one phase correlation between ground-based ULF waves and TEC  
361 perturbations may be challenging, largely due to ionospheric screening effects on ULF  
362 waves (Hughes & Southwood, 1976), with only a few exceptions noted during storm times  
363 (Pilipenko et al., 2014; Wang et al., 2020). However, this correlation has been frequently  
364 observed with spacecraft measurements of ULF waves (Watson et al., 2015; Watson, Jay-  
365 achandran, Singer, et al., 2016; Zhai et al., 2021), indicating that magnetospheric pro-  
366 cesses may play an important role in driving ionospheric TEC perturbations. Our find-  
367 ings support that magnetospheric whistler-mode waves, modulated by ULF waves in the

Pc3–5 band, are responsible for these periodic TEC perturbations through associated electron precipitation.

These results enhance our understanding of TEC modulation by ULF waves, a topic widely discussed in the literature (Skone, 2009; Pilipenko et al., 2014; Watson et al., 2015; Watson, Jayachandran, Singer, et al., 2016; Wang et al., 2020; Zhai et al., 2021), and facilitates the integration of effects of magnetospheric whistler-mode waves into auroral TEC models. Statistical modeling of whistler-mode and ULF waves has been improving for several decades (e.g., Tsurutani & Smith, 1974; McPherron, 1972; Takahashi & Anderson, 1992; W. Li, Bortnik, Thorne, & Angelopoulos, 2011; Agapitov et al., 2013; Artemyev et al., 2016; Tyler et al., 2019; Zong et al., 2017; Ma et al., 2020; Zhang et al., 2020; Sandhu et al., 2021; Hartinger et al., 2015, 2022, 2023). Leveraging these wave effects and the associated electron precipitation can enhance understanding and physics-based modeling of high-latitude TEC (Ridley et al., 2006; Zettergren & Snively, 2015; Meng et al., 2016, 2020; Sheng et al., 2020; Verkhoglyadova et al., 2020; Huba & Drob, 2017). Incorporating these magnetospheric phenomena is vital for improving the accuracy of ionospheric TEC models during periods of elevated geomagnetic activities, potentially benefiting ionospheric science and GNSS-based applications.

## 5 Conclusions

We present a detailed case study of ionospheric TEC perturbations (dTEC), using fortuitously timed and positioned conjugate observations from the THEMIS spacecraft and the GPS receiver at Fairbanks, Alaska (FAIR). This conjunction setup allows us to identify the magnetospheric driver of the observed dTEC. Our key findings are summarized below:

- Combining in-situ wave and electron observations and quasilinear theory, we have modeled the electron precipitation induced by observed whistler-mode waves and deduced ionospheric dTEC based on impact ionization predictions. The cross-correlation between the modeled and observed dTEC reached  $\sim 0.8$  during the conjugacy period of  $\sim 30$  min but decreased outside of it.
- Observed peak-to-peak dTEC amplitudes reached  $\sim 0.5$  TECU, exhibiting modulations spanning scales of  $\sim 5$ – $80$  km. Within the modulated dTEC, enhancements in the rate of TEC index (ROTI) were measured to be  $\sim 0.2$  TECU/min.

- 399 • The whistler-mode waves and dTEC modulations were linked to ULF waves in the  
400 Pc3-5 band, featuring concurrent compressional and poloidal mode fluctuations.  
401 The amplitude spectra of whistler-mode waves and dTEC also agreed from 1 mHz  
402 to tens of mHz during the conjugacy period but diverged outside of it.

403 Thus, our results provide direct evidence that ULF-modulated whistler-mode waves  
404 in the magnetosphere drive electron precipitation leading to ionospheric TEC pertur-  
405 bation modulations. Our observations also indicate that to reliably identify the electron  
406 precipitation responsible for TEC perturbations requires precise spacecraft spatial align-  
407 ment, optimal timing, and high raypath elevations. Our findings may help to augment  
408 physics-based high-latitude TEC modeling and forecasting by incorporating the effects  
409 of magnetospheric wave-driven precipitation.

### 410 **Acknowledgments**

411 This work has been supported by NASA projects 80NSSC23K0413, 80NSSC24K0138,  
412 and 80NSSC23K1038. Portions of the research were carried out at the Jet Propulsion  
413 Laboratory, California Institute of Technology, under a contract with NASA. O.P.V., M.D.H.,  
414 and X.S. were supported by NASA project 80NSSC21K1683. X.S. is supported by NASA  
415 award 80NSSC21K1677. O.P.V would like to thank A.W. Moore (JPL) for data process-  
416 ing discussions. We are indebted to Emmanuel Masongsong for help with the schematic  
417 figure.

### 418 **Open Research**

419 THEMIS data are available at <http://themis.ssl.berkeley.edu/data/themis/>.  
420 GPS RINEX data are publicly available from the NASA CDDIS archive of space geodesy  
421 data ([https://cddis.nasa.gov/Data\\_and\\_Derived\\_Products/index.html](https://cddis.nasa.gov/Data_and_Derived_Products/index.html)). TEC data  
422 derived for this study is available at [https://dataverse.jpl.nasa.gov/dataset.xhtml](https://dataverse.jpl.nasa.gov/dataset.xhtml?persistentId=doi:10.48577/jpl.KXY5BW)  
423 [?persistentId=doi:10.48577/jpl.KXY5BW](https://dataverse.jpl.nasa.gov/dataset.xhtml?persistentId=doi:10.48577/jpl.KXY5BW). Original CMO data are provided by the  
424 USGS Geomagnetism Program (<http://geomag.usgs.gov>). FYKN data are part of the  
425 Geophysical Institute Magnetometer Array operated by the Geophysical Institute, Uni-  
426 versity of Alaska (<http://magnet.asf.alaska.edu/>). Data access and processing was  
427 done using SPEDAS V4.1, see Angelopoulos et al. (2019).

428 **References**

- 429 Aa, E., Zou, S., Eastes, R., Karan, D. K., Zhang, S.-R., Erickson, P. J., & Coster,  
 430 A. J. (2020, January). Coordinated Ground-Based and Space-Based Observa-  
 431 tions of Equatorial Plasma Bubbles. *Journal of Geophysical Research (Space*  
 432 *Physics)*, *125*(1), e27569. doi: 10.1029/2019JA027569
- 433 Agapitov, O. V., Artemyev, A., Krasnoselskikh, V., Khotyaintsev, Y. V., Moure-  
 434 nas, D., Breuillard, H., ... Rolland, G. (2013, June). Statistics of whistler  
 435 mode waves in the outer radiation belt: Cluster STAFF-SA measurements. *J.*  
 436 *Geophys. Res.*, *118*, 3407-3420. doi: 10.1002/jgra.50312
- 437 Agapitov, O. V., Artemyev, A., Mourenas, D., Krasnoselskikh, V., Bonnell, J., Le  
 438 Contel, O., ... Angelopoulos, V. (2014). The quasi-electrostatic mode of  
 439 chorus waves and electron nonlinear acceleration. *J. Geophys. Res.*, *119*,  
 440 1606–1626. doi: 10.1002/2013JA019223
- 441 Agapitov, O. V., Blum, L. W., Mozer, F. S., Bonnell, J. W., & Wygant, J. (2017,  
 442 March). Chorus whistler wave source scales as determined from multipoint  
 443 Van Allen Probe measurements. *Geophys. Res. Lett.*, *44*, 2634-2642. doi:  
 444 10.1002/2017GL072701
- 445 Agapitov, O. V., Mourenas, D., Artemyev, A., Mozer, F. S., Bonnell, J. W., An-  
 446 gelopoulos, V., ... Krasnoselskikh, V. (2018, October). Spatial Extent and  
 447 Temporal Correlation of Chorus and Hiss: Statistical Results From Multipoint  
 448 THEMIS Observations. *Journal of Geophysical Research (Space Physics)*,  
 449 *123*(10), 8317-8330. doi: 10.1029/2018JA025725
- 450 Angelopoulos, V. (2008, December). The THEMIS Mission. *Space Sci. Rev.*, *141*, 5-  
 451 34. doi: 10.1007/s11214-008-9336-1
- 452 Angelopoulos, V., Cruce, P., Drozdov, A., Grimes, E. W., Hatzigeorgiu, N., King,  
 453 D. A., ... Schroeder, P. (2019, January). The Space Physics Environ-  
 454 ment Data Analysis System (SPEDAS). *Space Sci. Rev.*, *215*, 9. doi:  
 455 10.1007/s11214-018-0576-4
- 456 Artemyev, A. V., Agapitov, O., Mourenas, D., Krasnoselskikh, V., Shastun, V., &  
 457 Mozer, F. (2016, April). Oblique Whistler-Mode Waves in the Earth's Inner  
 458 Magnetosphere: Energy Distribution, Origins, and Role in Radiation Belt Dy-  
 459 namics. *Space Sci. Rev.*, *200*(1-4), 261-355. doi: 10.1007/s11214-016-0252-5
- 460 Artemyev, A. V., Mourenas, D., Agapitov, O. V., & Krasnoselskikh, V. V. (2013,

- 461 April). Parametric validations of analytical lifetime estimates for radiation belt  
 462 electron diffusion by whistler waves. *Annales Geophysicae*, *31*, 599-624. doi:  
 463 10.5194/angeo-31-599-2013
- 464 Astafyeva, E. (2019, December). Ionospheric Detection of Natural Hazards. *Reviews*  
 465 *of Geophysics*, *57*(4), 1265-1288. doi: 10.1029/2019RG000668
- 466 Auster, H. U., Glassmeier, K. H., Magnes, W., Aydogar, O., Baumjohann,  
 467 W., Constantinescu, D., ... Wiedemann, M. (2008, December). The  
 468 THEMIS Fluxgate Magnetometer. *Space Sci. Rev.*, *141*, 235-264. doi:  
 469 10.1007/s11214-008-9365-9
- 470 Basu, S., Groves, K. M., Basu, S., & Sultan, P. J. (2002, November). Specification  
 471 and forecasting of scintillations in communication/navigation links: current  
 472 status and future plans. *Journal of Atmospheric and Solar-Terrestrial Physics*,  
 473 *64*(16), 1745-1754. doi: 10.1016/S1364-6826(02)00124-4
- 474 Basu, S., MacKenzie, E., Basu, S., Carlson, H. C., Hardy, D. A., Rich, F. J., & Liv-  
 475 ington, R. C. (1983, December). Coordinated measurements of low-energy  
 476 electron precipitation and scintillations/TEC in the auroral oval. *Radio Sci-*  
 477 *ence*, *18*(6), 1151-1165. doi: 10.1029/RS018i006p01151
- 478 Basu, S., MacKenzie, E., Basu, S., Coley, W. R., Sharber, J. R., & Hoegy, W. R.  
 479 (1990, June). Plasma structuring by the gradient drift instability at high lati-  
 480 tudes and comparison with velocity shear driven processes. *J. Geophys. Res.*,  
 481 *95*(A6), 7799-7818. doi: 10.1029/JA095iA06p07799
- 482 Berland, G. D., Marshall, R. A., Capannolo, L., McCarthy, M. P., & Zheng, L.  
 483 (2023, November). Kinetic Modeling of Radiation Belt Electrons With Geant4  
 484 to Study Energetic Particle Precipitation in Earth's Atmosphere. *Earth and*  
 485 *Space Science*, *10*(11), e2023EA002987. doi: 10.1029/2023EA002987
- 486 Bertiger, W., Bar-Sever, Y., Dorsey, A., Haines, B., Harvey, N., Hemberger, D., ...  
 487 Willis, P. (2020, August). GipsyX/RTGx, a new tool set for space geodetic  
 488 operations and research. *Advances in Space Research*, *66*(3), 469-489. doi:  
 489 10.1016/j.asr.2020.04.015
- 490 Bonnell, J. W., Mozer, F. S., Delory, G. T., Hull, A. J., Ergun, R. E., Cully, C. M.,  
 491 ... Harvey, P. R. (2008, December). The Electric Field Instrument (EFI) for  
 492 THEMIS. *Space Sci. Rev.*, *141*, 303-341. doi: 10.1007/s11214-008-9469-2
- 493 Cattell, C., Wygant, J. R., Goetz, K., Kersten, K., Kellogg, P. J., von Rosenvinge,

- 494 T., . . . Russell, C. T. (2008, January). Discovery of very large amplitude  
 495 whistler-mode waves in Earth's radiation belts. *Geophys. Res. Lett.*, *35*, 1105.  
 496 doi: 10.1029/2007GL032009
- 497 Chaston, C. C., Peticolas, L. M., Bonnell, J. W., Carlson, C. W., Ergun, R. E., Mc-  
 498 Fadden, J. P., & Strangeway, R. J. (2003, February). Width and brightness of  
 499 auroral arcs driven by inertial Alfvén waves. *Journal of Geophysical Research*  
 500 *(Space Physics)*, *108*(A2), 1091. doi: 10.1029/2001JA007537
- 501 Ciruolo, L., Azpilicueta, F., Brunini, C., Meza, A., & Radicella, S. M. (2007). Cali-  
 502 bration errors on experimental slant total electron content (TEC) determined  
 503 with GPS. *Journal of Geodesy*, *81*, 111–120.
- 504 Coker, C., Hunsucker, R., & Lott, G. (1995, December). Detection of auroral activ-  
 505 ity using GPS satellites. *Geophys. Res. Lett.*, *22*(23), 3259–3262. doi: 10.1029/  
 506 95GL03091
- 507 Coroniti, F. V., & Kennel, C. F. (1970, March). Electron precipitation pulsations.  
 508 *J. Geophys. Res.*, *75*(7), 1279–1289. doi: 10.1029/JA075i007p01279
- 509 Coster, A., Williams, J., Weatherwax, A., Rideout, W., & Herne, D. (2013, March).  
 510 Accuracy of GPS total electron content: GPS receiver bias temperature depen-  
 511 dence. *Radio Science*, *48*(2), 190–196. doi: 10.1002/rds.20011
- 512 Cully, C. M., Bonnell, J. W., & Ergun, R. E. (2008, June). THEMIS observations  
 513 of long-lived regions of large-amplitude whistler waves in the inner magneto-  
 514 sphere. *Geophys. Res. Lett.*, *35*, 17. doi: 10.1029/2008GL033643
- 515 Cully, C. M., Ergun, R. E., Stevens, K., Nammari, A., & Westfall, J. (2008, Decem-  
 516 ber). The THEMIS Digital Fields Board. *Space Sci. Rev.*, *141*, 343–355. doi:  
 517 10.1007/s11214-008-9417-1
- 518 Davies, K., & Hartmann, G. K. (1976, July). Short-period fluctuations in total  
 519 columnar electron content. *J. Geophys. Res.*, *81*(19), 3431. doi: 10.1029/  
 520 JA081i019p03431
- 521 Deng, Y., & Ridley, A. J. (2007, September). Possible reasons for underestim-  
 522 ating Joule heating in global models: E field variability, spatial resolution, and  
 523 vertical velocity. *Journal of Geophysical Research (Space Physics)*, *112*(A9),  
 524 A09308. doi: 10.1029/2006JA012006
- 525 Fæhn Follestad, A., Herlingshaw, K., Ghadjari, H., Knudsen, D. J., McWilliams,  
 526 K. A., Moen, J. I., . . . Oksavik, K. (2020, June). Dayside Field-Aligned

- 527 Current Impacts on Ionospheric Irregularities. *Geophys. Res. Lett.*, *47*(11),  
 528 e86722. doi: 10.1029/2019GL086722
- 529 Fang, X., Randall, C. E., Lummerzheim, D., Wang, W., Lu, G., Solomon, S. C.,  
 530 & Frahm, R. A. (2010, November). Parameterization of monoenergetic  
 531 electron impact ionization. *Geophys. Res. Lett.*, *37*(22), L22106. doi:  
 532 10.1029/2010GL045406
- 533 Fejer, B. G., & Kelley, M. C. (1980, May). Ionospheric irregularities. *Reviews of*  
 534 *Geophysics and Space Physics*, *18*, 401-454. doi: 10.1029/RG018i002p00401
- 535 Hartinger, M. D., Elsdén, T., Archer, M. O., Takahashi, K., Wright, A. N., Arte-  
 536 myev, A., . . . Angelopoulos, V. (2023, December). Properties of Magneto-  
 537 hydrodynamic Normal Modes in the Earth's Magnetosphere. *Journal*  
 538 *of Geophysical Research (Space Physics)*, *128*(12), e2023JA031987. doi:  
 539 10.1029/2023JA031987
- 540 Hartinger, M. D., Moldwin, M. B., Zou, S., Bonnell, J. W., & Angelopoulos, V.  
 541 (2015, January). ULF wave electromagnetic energy flux into the ionosphere:  
 542 Joule heating implications. *Journal of Geophysical Research (Space Physics)*,  
 543 *120*(1), 494-510. doi: 10.1002/2014JA020129
- 544 Hartinger, M. D., Takahashi, K., Drozdov, A. Y., Shi, X., Usanova, M. E., & Kress,  
 545 B. (2022, April). ULF Wave Modeling, Effects, and Applications: Accom-  
 546 plishments, Recent Advances, and Future. *Frontiers in Astronomy and Space*  
 547 *Sciences*, *9*, 867394. doi: 10.3389/fspas.2022.867394
- 548 Hartley, D. P., Kletzing, C. A., Kurth, W. S., Bounds, S. R., Averkamp, T. F.,  
 549 Hospodarsky, G. B., . . . Watt, C. E. J. (2016, May). Using the cold plasma  
 550 dispersion relation and whistler mode waves to quantify the antenna sheath  
 551 impedance of the Van Allen Probes EFW instrument. *Journal of Geophysical*  
 552 *Research (Space Physics)*, *121*(5), 4590-4606. doi: 10.1002/2016JA022501
- 553 Hey, J. S., Parsons, S. J., & Phillips, J. W. (1946, August). Fluctuations in Cos-  
 554 mic Radiation at Radio-Frequencies. *Nature*, *158*(4007), 234. doi: 10.1038/  
 555 158234a0
- 556 Huang, C.-L., Spence, H. E., Singer, H. J., & Tsyganenko, N. A. (2008, April).  
 557 A quantitative assessment of empirical magnetic field models at geosyn-  
 558 chronous orbit during magnetic storms. *Journal of Geophysical Research*  
 559 *(Space Physics)*, *113*(A4), A04208. doi: 10.1029/2007JA012623

- 560 Huang, C.-S., & Kelley, M. C. (1996, January). Nonlinear evolution of equatorial  
561 spread F. 2. Gravity wave seeding of Rayleigh-Taylor instability. *J. Geophys.*  
562 *Res.*, *101*(A1), 293-302. doi: 10.1029/95JA02210
- 563 Huba, J. D., & Drob, D. (2017, June). SAMI3 prediction of the impact of the 21  
564 August 2017 total solar eclipse on the ionosphere/plasmasphere system. *Geo-*  
565 *phys. Res. Lett.*, *44*(12), 5928-5935. doi: 10.1002/2017GL073549
- 566 Hughes, W. J., & Southwood, D. J. (1976, July). The screening of micropulsation  
567 signals by the atmosphere and ionosphere. *J. Geophys. Res.*, *81*(19), 3234.  
568 doi: 10.1029/JA081i019p03234
- 569 Jakowski, N., Mayer, C., Hoque, M., & Wilken, V. (2011). Total electron content  
570 models and their use in ionosphere monitoring. *Radio Science*, *46*(06), 1–11.
- 571 Jakowski, N., Sardon, E., Engler, E., Jungstand, A., & Klähn, D. (1996, De-  
572 cember). Relationships between GPS-signal propagation errors and  
573 EISCAT observations. *Annales Geophysicae*, *14*(12), 1429-1436. doi:  
574 10.1007/s00585-996-1429-0
- 575 Jakowski, N., Wilken, V., & Mayer, C. (2007, August). Space weather monitoring by  
576 GPS measurements on board CHAMP. *Space Weather*, *5*(8), 08006. doi: 10  
577 .1029/2006SW000271
- 578 Jaynes, A. N., Lessard, M. R., Takahashi, K., Ali, A. F., Malaspina, D. M., Michell,  
579 R. G., ... Wygant, J. R. (2015, October). Correlated Pc4-5 ULF waves,  
580 whistler-mode chorus, and pulsating aurora observed by the Van Allen  
581 Probes and ground-based systems. *J. Geophys. Res.*, *120*, 8749-8761. doi:  
582 10.1002/2015JA021380
- 583 Jin, Y., Moen, J. I., & Miloch, W. J. (2015). On the collocation of the cusp au-  
584 rora and the GPS phase scintillation: A statistical study. *Journal of Geophys-  
585 ical Research: Space Physics*, *120*(10), 9176–9191.
- 586 Jin, Y., Xiong, C., Clausen, L., Spicher, A., Kotova, D., Brask, S., ... Miloch, W.  
587 (2020, July). Ionospheric Plasma Irregularities Based on In Situ Measurements  
588 From the Swarm Satellites. *Journal of Geophysical Research (Space Physics)*,  
589 *125*(7), e28103. doi: 10.1029/2020JA028103
- 590 Kaeppler, S. R., Marshall, R., Sanchez, E. R., Juarez Madera, D. H., Troyer, R., &  
591 Jaynes, A. N. (2022, December). pyGPI5: A python D- and E-region chem-  
592 istry and ionization model. *Frontiers in Astronomy and Space Sciences*, *9*,



- 593 338. doi: 10.3389/fspas.2022.1028042
- 594 Kasahara, S., Miyoshi, Y., Yokota, S., Kasahara, Y., Matsuda, S., Kumamoto, A.,  
595 ... Shinohara, I. (2018). Pulsating aurora from electron scattering by chorus  
596 waves. *Nature*, *554*, 337-340. doi: 10.1038/nature25505
- 597 Katoh, Y., Rosendahl, P. S., Ogawa, Y., Hiraki, Y., & Tadokoro, H. (2023, Decem-  
598 ber). Effect of the mirror force on the collision rate due to energetic electron  
599 precipitation: Monte Carlo simulations. *Earth, Planets and Space*, *75*(1), 117.  
600 doi: 10.1186/s40623-023-01871-y
- 601 Kelley, M. C. (2009). *The Earth's ionosphere: Plasma physics and electrodynamics*.  
602 Academic press.
- 603 Kennel, C. F., & Engelmann, F. (1966, November). Velocity Space Diffusion from  
604 Weak Plasma Turbulence in a Magnetic Field. *Physics of Fluids*, *9*, 2377-2388.  
605 doi: 10.1063/1.1761629
- 606 Kennel, C. F., & Petschek, H. E. (1966, January). Limit on Stably Trapped Particle  
607 Fluxes. *J. Geophys. Res.*, *71*, 1-28.
- 608 Keskinen, M. J., & Ossakow, S. L. (1983, January). Nonlinear evolution of convect-  
609 ing plasma enhancements in the auroral ionosphere, 2. Small scale irregulari-  
610 ties. *J. Geophys. Res.*, *88*(A1), 474-482. doi: 10.1029/JA088iA01p00474
- 611 Kintner, P. M., Ledvina, B. M., & de Paula, E. R. (2007, September). GPS  
612 and ionospheric scintillations. *Space Weather*, *5*(9), 09003. doi: 10.1029/  
613 2006SW000260
- 614 Komjathy, A. (1997). *Global ionospheric total electron content mapping using the*  
615 *global positioning system* (Unpublished doctoral dissertation). University of  
616 New Brunswick, Canada.
- 617 Komjathy, A., Sparks, L., Wilson, B. D., & Mannucci, A. J. (2005, December).  
618 Automated daily processing of more than 1000 ground-based GPS receivers  
619 for studying intense ionospheric storms. *Radio Science*, *40*(6), RS6006. doi:  
620 10.1029/2005RS003279
- 621 Komjathy, A., Yang, Y.-M., Meng, X., Verkhoglyadova, O., Mannucci, A. J.,  
622 & Langley, R. B. (2016, July). Review and perspectives: Understand-  
623 ing natural-hazards-generated ionospheric perturbations using GPS mea-  
624 surements and coupled modeling. *Radio Science*, *51*(7), 951-961. doi:  
625 10.1002/2015RS005910

- 626 Le Contel, O., Roux, A., Robert, P., Coillot, C., Bouabdellah, A., de La Porte,  
 627 B., ... Larson, D. (2008, December). First Results of the THEMIS  
 628 Search Coil Magnetometers. *Space Sci. Rev.*, *141*, 509-534. doi: 10.1007/  
 629 s11214-008-9371-y
- 630 Lessard, M. R., & Knudsen, D. J. (2001, October). Ionospheric reflection of small-  
 631 scale Alfvén waves. *Geophys. Res. Lett.*, *28*(18), 3573-3576. doi: 10.1029/  
 632 2000GL012529
- 633 Li, L., Omura, Y., Zhou, X.-Z., Zong, Q.-G., Rankin, R., Yue, C., & Fu, S.-  
 634 Y. (2022, May). Nonlinear Wave Growth Analysis of Chorus Emissions  
 635 Modulated by ULF Waves. *Geophys. Res. Lett.*, *49*(10), e97978. doi:  
 636 10.1029/2022GL097978
- 637 Li, L., Omura, Y., Zhou, X.-Z., Zong, Q.-G., Rankin, R., Yue, C., ... Ren, J. (2023,  
 638 February). Chorus Wave Generation Modulated by Field Line Resonance and  
 639 Mirror-Mode ULF Waves. *Journal of Geophysical Research (Space Physics)*,  
 640 *128*(2), e2022JA031127. doi: 10.1029/2022JA031127
- 641 Li, W., Bortnik, J., Thorne, R. M., & Angelopoulos, V. (2011, December). Global  
 642 distribution of wave amplitudes and wave normal angles of chorus waves  
 643 using THEMIS wave observations. *J. Geophys. Res.*, *116*, 12205. doi:  
 644 10.1029/2011JA017035
- 645 Li, W., Bortnik, J., Thorne, R. M., Nishimura, Y., Angelopoulos, V., & Chen, L.  
 646 (2011, June). Modulation of whistler mode chorus waves: 2. Role of density  
 647 variations. *J. Geophys. Res.*, *116*, A06206. doi: 10.1029/2010JA016313
- 648 Li, W., Thorne, R. M., Bortnik, J., Nishimura, Y., & Angelopoulos, V. (2011, June).  
 649 Modulation of whistler mode chorus waves: 1. Role of compressional Pc4-5  
 650 pulsations. *J. Geophys. Res.*, *116*, A06205. doi: 10.1029/2010JA016312
- 651 Liang, J., Shen, Y., Knudsen, D., Spanswick, E., Burchill, J., & Donovan, E. (2019,  
 652 June). e-POP and Red Line Optical Observations of Alfvénic Auroras. *Jour-  
 653 nal of Geophysical Research (Space Physics)*, *124*(6), 4672-4696. doi: 10.1029/  
 654 2019JA026679
- 655 Lyons, L. R. (1974, December). Pitch angle and energy diffusion coefficients from  
 656 resonant interactions with ion-cyclotron and whistler waves. *Journal of Plasma  
 657 Physics*, *12*, 417-432. doi: 10.1017/S002237780002537X
- 658 Lysak, R. L. (1991, February). Feedback instability of the ionospheric resonant cav-

- 659 ity. *J. Geophys. Res.*, *96*(A2), 1553-1568. doi: 10.1029/90JA02154
- 660 Ma, Q., Connor, H. K., Zhang, X. J., Li, W., Shen, X. C., Gillespie, D., ... Spence,  
661 H. E. (2020, August). Global Survey of Plasma Sheet Electron Precipitation  
662 due to Whistler Mode Chorus Waves in Earth's Magnetosphere. *Geophys.*  
663 *Res. Lett.*, *47*(15), e88798. doi: 10.1029/2020GL088798
- 664 Makarevich, R. A., Crowley, G., Azeem, I., Ngwira, C., & Forsythe, V. V. (2021,  
665 May). Auroral E Region as a Source Region for Ionospheric Scintillation.  
666 *Journal of Geophysical Research (Space Physics)*, *126*(5), e29212. doi:  
667 10.1029/2021JA029212
- 668 Mannucci, A. J., Wilson, B. D., Yuan, D. N., Ho, C. H., Lindqwister, U. J., &  
669 Runge, T. F. (1998, May). A global mapping technique for GPS-derived  
670 ionospheric total electron content measurements. *Radio Science*, *33*(3), 565-  
671 582. doi: 10.1029/97RS02707
- 672 McCaffrey, A. M., & Jayachandran, P. T. (2017, June). Observation of subsecond  
673 variations in auroral region total electron content using 100 Hz sampling of  
674 GPS observables. *Journal of Geophysical Research (Space Physics)*, *122*(6),  
675 6892-6900. doi: 10.1002/2017JA024255
- 676 McCaffrey, A. M., & Jayachandran, P. T. (2019, February). Determination of the  
677 Refractive Contribution to GPS Phase "Scintillation". *Journal of Geophysical*  
678 *Research (Space Physics)*, *124*(2), 1454-1469. doi: 10.1029/2018JA025759
- 679 McFadden, J. P., Carlson, C. W., Larson, D., Ludlam, M., Abiad, R., Elliott, B.,  
680 ... Angelopoulos, V. (2008, December). The THEMIS ESA Plasma In-  
681 strument and In-flight Calibration. *Space Sci. Rev.*, *141*, 277-302. doi:  
682 10.1007/s11214-008-9440-2
- 683 McPherron, R. L. (1972, September). Substorm related changes in the geomagnetic  
684 tail: The growth phase. *Planetary Space Science*, *20*, 1521-1539. doi: 10.1016/  
685 0032-0633(72)90054-2
- 686 Meng, X., Mannucci, A. J., Verkhoglyadova, O. P., & Tsurutani, B. T. (2016, April).  
687 On forecasting ionospheric total electron content responses to high-speed solar  
688 wind streams. *Journal of Space Weather and Space Climate*, *6*, A19. doi:  
689 10.1051/swsc/2016014
- 690 Meng, X., Mannucci, A. J., Verkhoglyadova, O. P., Tsurutani, B. T., Ridley, A. J.,  
691 & Shim, J.-S. (2020, February). Thermosphere-Ionosphere Modeling With

- 692 Forecastable Inputs: Case Study of the June 2012 High-Speed Stream Geo-  
 693 magnetic Storm. *Space Weather*, 18(2), e02352. doi: 10.1029/2019SW002352
- 694 Meng, X., Ozturk, D. S., Verkhoglyadova, O. P., Varney, R. H., Reimer, A. S., Seme-  
 695 ter, J. L., . . . Zhan, W. (2022, December). Energy Deposition by Mesoscale  
 696 High-Latitude Electric Fields Into the Thermosphere During the 26 October  
 697 2019 Geomagnetic Storm. *Journal of Geophysical Research (Space Physics)*,  
 698 127(12), e2022JA030716. doi: 10.1029/2022JA030716
- 699 Meredith, N. P., Bortnik, J., Horne, R. B., Li, W., & Shen, X.-C. (2021). Statisti-  
 700 cal investigation of the frequency dependence of the chorus source mechanism  
 701 of plasmaspheric hiss. *Geophysical Research Letters*, 48(6), e2021GL092725.  
 702 Retrieved from [https://agupubs.onlinelibrary.wiley.com/doi/abs/](https://agupubs.onlinelibrary.wiley.com/doi/abs/10.1029/2021GL092725)  
 703 10.1029/2021GL092725 (e2021GL092725 2021GL092725) doi: [https://](https://doi.org/10.1029/2021GL092725)  
 704 doi.org/10.1029/2021GL092725
- 705 Miyoshi, Y., Katoh, Y., Nishiyama, T., Sakanoi, T., Asamura, K., & Hirahara, M.  
 706 (2010, October). Time of flight analysis of pulsating aurora electrons, consid-  
 707 ering wave-particle interactions with propagating whistler mode waves. *J.*  
 708 *Geophys. Res.*, 115, A10312. doi: 10.1029/2009JA015127
- 709 Moen, J., Oksavik, K., Alfonsi, L., Daabakk, Y., Romano, V., & Spogli, L. (2013,  
 710 January). Space weather challenges of the polar cap ionosphere. *Journal of*  
 711 *Space Weather and Space Climate*, 3, A02. doi: 10.1051/swsc/2013025
- 712 Newell, P. T., Sotirelis, T., & Wing, S. (2009, September). Diffuse, monoenergetic,  
 713 and broadband aurora: The global precipitation budget. *J. Geophys. Res.*,  
 714 114, A09207. doi: 10.1029/2009JA014326
- 715 Nishimura, Y., Bortnik, J., Li, W., Thorne, R. M., Lyons, L. R., Angelopoulos, V.,  
 716 . . . Auster, U. (2010, October). Identifying the Driver of Pulsating Aurora.  
 717 *Science*, 330, 81-84. doi: 10.1126/science.1193186
- 718 Nishimura, Y., Bortnik, J., Li, W., Thorne, R. M., Ni, B., Lyons, L. R., . . . Auster,  
 719 U. (2013, Feb). Structures of dayside whistler-mode waves deduced from  
 720 conjugate diffuse aurora. *Journal of Geophysical Research (Space Physics)*,  
 721 118(2), 664-673. doi: 10.1029/2012JA018242
- 722 Nishimura, Y., Kelly, T., Jayachandran, P. T., Mrak, S., Semeter, J. L., Dono-  
 723 van, E. F., . . . Nishitani, N. (2023, August). Nightside High-Latitude  
 724 Phase and Amplitude Scintillation During a Substorm Using 1-Second Scin-

- 725       tillation Indices.       *Journal of Geophysical Research (Space Physics)*, *128*(8),  
726       e2023JA031402. doi: 10.1029/2023JA031402
- 727       Okuzawa, T., & Davies, K.       (1981, March).       Pulsations in total columnar elec-  
728       tron content.       *J. Geophys. Res.*, *86*(A3), 1355-1364.       doi: 10.1029/  
729       JA086iA03p01355
- 730       Pi, X., Mannucci, A. J., Lindqwister, U. J., & Ho, C. M.       (1997, September).       Mon-  
731       itoring of global ionospheric irregularities using the Worldwide GPS Network.  
732       *Geophys. Res. Lett.*, *24*(18), 2283-2286. doi: 10.1029/97GL02273
- 733       Picone, J. M., Hedin, A. E., Drob, D. P., & Aikin, A. C.       (2002, December).  
734       NRLMSISE-00 empirical model of the atmosphere: Statistical comparisons and  
735       scientific issues.       *Journal of Geophysical Research (Space Physics)*, *107*(A12),  
736       1468. doi: 10.1029/2002JA009430
- 737       Pilipenko, V., Belakhovsky, V., Murr, D., Fedorov, E., & Engebretson, M.       (2014,  
738       June).       Modulation of total electron content by ULF Pc5 waves.       *Jour-  
739       nal of Geophysical Research (Space Physics)*, *119*(6), 4358-4369.       doi:  
740       10.1002/2013JA019594
- 741       Prikryl, P., Jayachandran, P. T., Chadwick, R., & Kelly, T. D.       (2015, May).  
742       Climatology of GPS phase scintillation at northern high latitudes for the  
743       period from 2008 to 2013.       *Annales Geophysicae*, *33*(5), 531-545.       doi:  
744       10.5194/angeo-33-531-2015
- 745       Ridley, A. J., Deng, Y., & Tóth, G.       (2006, May).       The global ionosphere thermo-  
746       sphere model.       *Journal of Atmospheric and Solar-Terrestrial Physics*, *68*(8),  
747       839-864. doi: 10.1016/j.jastp.2006.01.008
- 748       Sandhu, J. K., Rae, I. J., Staples, F. A., Hartley, D. P., Walach, M. T., Elsdén, T.,  
749       & Murphy, K. R.       (2021, July).       The Roles of the Magnetopause and Plasma-  
750       pause in Storm-Time ULF Wave Power Enhancements.       *Journal of Geophysical  
751       Research (Space Physics)*, *126*(7), e29337. doi: 10.1029/2021JA029337
- 752       Santolík, O., Gurnett, D. A., Pickett, J. S., Parrot, M., & Cornilleau-Wehrlin, N.  
753       (2003, July).       Spatio-temporal structure of storm-time chorus.       *J. Geophys.  
754       Res.*, *108*, 1278. doi: 10.1029/2002JA009791
- 755       Semeter, J., Mrak, S., Hirsch, M., Swoboda, J., Akbari, H., Starr, G., ...  
756       Pankratius, V.       (2017, October).       GPS Signal Corruption by the Discrete  
757       Aurora: Precise Measurements From the Mahali Experiment.       *Geophys. Res.*

- 758 *Lett.*, 44(19), 9539-9546. doi: 10.1002/2017GL073570
- 759 Shen, Y., Artemyev, A., Zhang, X.-J., Vasko, I. Y., Runov, A., Angelopoulos, V., &  
760 Knudsen, D. (2020, August). Potential Evidence of Low-Energy Electron Scatter-  
761 ing and Ionospheric Precipitation by Time Domain Structures. *Geophys.*  
762 *Res. Lett.*, 47(16), e89138. doi: 10.1029/2020GL089138
- 763 Sheng, C., Deng, Y., Zhang, S.-R., Nishimura, Y., & Lyons, L. R. (2020, Febru-  
764 ary). Relative Contributions of Ion Convection and Particle Precipitation  
765 to Exciting Large-Scale Traveling Atmospheric and Ionospheric Distur-  
766 bances. *Journal of Geophysical Research (Space Physics)*, 125(2), e27342.  
767 doi: 10.1029/2019JA027342
- 768 Shi, R., Li, W., Ma, Q., Green, A., Kletzing, C. A., Kurth, W. S., ... Reeves, G. D.  
769 (2019, February). Properties of Whistler Mode Waves in Earth's Plasmas-  
770 sphere and Plumes. *Journal of Geophysical Research (Space Physics)*, 124(2),  
771 1035-1051. doi: 10.1029/2018JA026041
- 772 Shi, X., Baker, J. B. H., Ruohoniemi, J. M., Hartinger, M. D., Murphy, K. R., Ro-  
773 driguez, J. V., ... Angelopoulos, V. (2018, October). Long-Lasting Poloidal  
774 ULF Waves Observed by Multiple Satellites and High-Latitude SuperDARN  
775 Radars. *Journal of Geophysical Research (Space Physics)*, 123(10), 8422-8438.  
776 doi: 10.1029/2018JA026003
- 777 Shi, X., Zhang, X.-J., Artemyev, A., Angelopoulos, V., Hartinger, M. D., Tsai,  
778 E., & Wilkins, C. (2022, December). On the Role of ULF Waves in the  
779 Spatial and Temporal Periodicity of Energetic Electron Precipitation. *Jour-*  
780 *nal of Geophysical Research (Space Physics)*, 127(12), e2022JA030932. doi:  
781 10.1029/2022JA030932
- 782 Skone, S. (2009, February). Using GPS TEC measurements to detect geomagnetic  
783 Pc 3 pulsations. *Radio Science*, 44(19), RS0A27. doi: 10.1029/2008RS004106
- 784 Spicher, A., Clausen, L. B. N., Miloch, W. J., Lofstad, V., Jin, Y., & Moen, J. I.  
785 (2017, March). Interhemispheric study of polar cap patch occurrence based on  
786 Swarm in situ data. *Journal of Geophysical Research (Space Physics)*, 122(3),  
787 3837-3851. doi: 10.1002/2016JA023750
- 788 Spogli, L., Alfonsi, L., de Franceschi, G., Romano, V., Aquino, M. H. O., & Dodson,  
789 A. (2009, September). Climatology of GPS ionospheric scintillations over high  
790 and mid-latitude European regions. *Annales Geophysicae*, 27(9), 3429-3437.

- 791           doi: 10.5194/angeo-27-3429-2009
- 792   Streltsov, A. V., & Lotko, W.       (2008, May).       Coupling between density struc-  
793       tures, electromagnetic waves and ionospheric feedback in the auroral zone.  
794       *Journal of Geophysical Research (Space Physics)*, *113*(A5), A05212.       doi:  
795       10.1029/2007JA012594
- 796   Takahashi, K., & Anderson, B. J.       (1992, July).       Distribution of ULF energy  
797       (<math>f \leq 80</math> mHz) in the inner magnetosphere: A statistical analysis of AMPTE  
798       CCE magnetic field data.       *J. Geophys. Res.*, *97*(A7), 10751-10773.       doi:  
799       10.1029/92JA00328
- 800   Tsunoda, R. T.       (1988, November).       High-latitude F-region irregularities:  
801       A review and synthesis.       *Reviews of Geophysics*, *26*(4), 719-760.       doi:  
802       10.1029/RG026i004p00719
- 803   Tsurutani, B. T., & Smith, E. J. (1974, January). Postmidnight chorus: A substorm  
804       phenomenon. *J. Geophys. Res.*, *79*, 118-127. doi: 10.1029/JA079i001p00118
- 805   Tsyganenko, N. A.   (1995, April).   Modeling the Earth's magnetospheric magnetic  
806       field confined within a realistic magnetopause.   *J. Geophys. Res.*, *100*, 5599-  
807       5612. doi: 10.1029/94JA03193
- 808   Tyler, E., Breneman, A., Cattell, C., Wygant, J., Thaller, S., & Malaspina, D.  
809       (2019, Mar).       Statistical Occurrence and Distribution of High-Amplitude  
810       Whistler Mode Waves in the Outer Radiation Belt.       *Geophys. Res. Lett.*,  
811       *46*(5), 2328-2336. doi: 10.1029/2019GL082292
- 812   Verkhoglyadova, O., Meng, X., Mannucci, A. J., Shim, J. S., & McGranaghan,  
813       R.       (2020, September).   Evaluation of Total Electron Content Prediction  
814       Using Three Ionosphere-Thermosphere Models.       *Space Weather*, *18*(9),  
815       e2020SW002452. doi: 10.1029/2020SW002452
- 816   Wang, B., Nishimura, Y., Hartinger, M., Sivadas, N., Lyons, L. L., Varney, R. H., &  
817       Angelopoulos, V. (2020, August). Ionospheric Modulation by Storm Time Pc5  
818       ULF Pulsations and the Structure Detected by PFISR-THEMIS Conjunction.  
819       *Geophys. Res. Lett.*, *47*(16), e89060. doi: 10.1029/2020GL089060
- 820   Watson, C., Jayachandran, P. T., & MacDougall, J. W. (2016, May). Characteris-  
821       tics of GPS TEC variations in the polar cap ionosphere. *Journal of Geophysi-  
822       cal Research (Space Physics)*, *121*(5), 4748-4768. doi: 10.1002/2015JA022275
- 823   Watson, C., Jayachandran, P. T., Singer, H. J., Redmon, R. J., & Danskin, D.

- 824 (2015, September). Large-amplitude GPS TEC variations associated with  
 825 Pc5-6 magnetic field variations observed on the ground and at geosynchronous  
 826 orbit. *Journal of Geophysical Research (Space Physics)*, 120(9), 7798-7821.  
 827 doi: 10.1002/2015JA021517
- 828 Watson, C., Jayachandran, P. T., Singer, H. J., Redmon, R. J., & Danskin, D.  
 829 (2016, February). GPS TEC response to Pc4 “giant pulsations”. *Jour-*  
 830 *nal of Geophysical Research (Space Physics)*, 121(2), 1722-1735. doi:  
 831 10.1002/2015JA022253
- 832 Watson, C., Jayachandran, P. T., Spanswick, E., Donovan, E. F., & Danskin, D. W.  
 833 (2011, October). GPS TEC technique for observation of the evolution of sub-  
 834 storm particle precipitation. *Journal of Geophysical Research (Space Physics)*,  
 835 116(A10), A00I90. doi: 10.1029/2010JA015732
- 836 Watt, C. E. J., Degeling, A. W., Rankin, R., Murphy, K. R., Rae, I. J., & Singer,  
 837 H. J. (2011, October). Ultralow-frequency modulation of whistler-mode wave  
 838 growth. *Journal of Geophysical Research (Space Physics)*, 116(A10), A10209.  
 839 doi: 10.1029/2011JA016730
- 840 Xia, Z., Chen, L., Dai, L., Claudepierre, S. G., Chan, A. A., Soto-Chavez, A. R.,  
 841 & Reeves, G. D. (2016, September). Modulation of chorus intensity by ULF  
 842 waves deep in the inner magnetosphere. *Geophys. Res. Lett.*, 43, 9444-9452.  
 843 doi: 10.1002/2016GL070280
- 844 Xia, Z., Chen, L., & Li, W. (2020, November). Statistical Study of Chorus Modula-  
 845 tions by Background Magnetic Field and Plasma Density. *Geophys. Res. Lett.*,  
 846 47(22), e89344. doi: 10.1029/2020GL089344
- 847 Xiong, C., Park, J., Lühr, H., Stolle, C., & Ma, S. Y. (2010, September). Compar-  
 848 ing plasma bubble occurrence rates at CHAMP and GRACE altitudes during  
 849 high and low solar activity. *Annales Geophysicae*, 28(9), 1647-1658. doi:  
 850 10.5194/angeo-28-1647-2010
- 851 Yeh, K. C., & Liu, C. H. (1982, April). Radio wave scintillations in the ionosphere.  
 852 *IEEE Proceedings*, 70, 324-360.
- 853 Yeoman, T. K., James, M., Mager, P. N., & Klimushkin, D. Y. (2012, June). Super-  
 854 DARN observations of high-m ULF waves with curved phase fronts and their  
 855 interpretation in terms of transverse resonator theory. *Journal of Geophysical*  
 856 *Research (Space Physics)*, 117(A6), A06231. doi: 10.1029/2012JA017668



- 857 Zettergren, M. D., & Snively, J. B. (2015, September). Ionospheric response  
858 to infrasonic-acoustic waves generated by natural hazard events. *Jour-*  
859 *nal of Geophysical Research (Space Physics)*, *120*(9), 8002-8024. doi:  
860 10.1002/2015JA021116
- 861 Zhai, C., Shi, X., Wang, W., Hartinger, M. D., Yao, Y., Peng, W., ... Baker,  
862 J. B. H. (2021, July). Characterization of High-m ULF Wave Signa-  
863 tures in GPS TEC Data. *Geophys. Res. Lett.*, *48*(14), e94282. doi:  
864 10.1029/2021GL094282
- 865 Zhang, X. J., Angelopoulos, V., Artemyev, A. V., Hartinger, M. D., & Bortnik, J.  
866 (2020, October). Modulation of Whistler Waves by Ultra-Low-Frequency Per-  
867 turbations: The Importance of Magnetopause Location. *Journal of Geophysical*  
868 *Research (Space Physics)*, *125*(10), e28334. doi: 10.1029/2020JA028334
- 869 Zhang, X.-J., Chen, L., Artemyev, A. V., Angelopoulos, V., & Liu, X. (2019,  
870 November). Periodic Excitation of Chorus and ECH Waves Modulated by  
871 Ultralow Frequency Compressions. *Journal of Geophysical Research (Space*  
872 *Physics)*, *124*(11), 8535-8550. doi: 10.1029/2019JA027201
- 873 Zong, Q., Rankin, R., & Zhou, X. (2017, Dec). The interaction of ultra-low-  
874 frequency pc3-5 waves with charged particles in Earth's magnetosphere. *Re-*  
875 *views of Modern Plasma Physics*, *1*(1), 10. doi: 10.1007/s41614-017-0011-4
